# Supplementary material for: Computational study on the mechanisms of inhibition of SARS-CoV-2 Mpro by aldehyde warheads based on DFT
Source: Royal Society of Chemistry journal article supplement (doi:10.1039/d3cp03394e), 2023-01-01
Supplement: d3cp03394e1.pdf [file d3cp03394e1.pdf]

## Computational Study on the Mechanisms of Inhibition of SARS-CoV-2 M<sup>pro</sup> by Aldehyde Warhead Based on DFT

Yongsheng Yang,<sup>\*a</sup> Chenghua Zhang,<sup>a</sup> Xingcan Qian,<sup>a</sup> Feiyun Jia<sup>a</sup> and Shiwei Liang<sup>b</sup>

<sup>a</sup> School of Pharmacy and Institute of Pharmacy, North Sichuan Medical College, Sichuan, China

<sup>b</sup> School of Basic Medical Sciences and Forensic Medicine, North Sichuan Medical College, Sichuan, China

### Reference for Gaussian 09 program:

Gaussian 09, Revision E.01, Frisch, M. J.; Trucks, G. W.; Schlegel, H. B.; Scuseria, G. E.; Robb, M. A.; Cheeseman, J. R.; Scalmani, G.; Barone, V.; Petersson, G. A.; Nakatsuji, H.; Li, X.; Caricato, M.; Marenich, A. V.; Bloino, J.; Janesko, B. G.; Gomperts, R.; Mennucci, B.; Hratchian, H. P.; Ortiz, J. V.; Izmaylov, A. F.; Sonnenberg, J. L.; Williams-Young, D.; Ding, F.; Lipparini, F.; Egidi, F.; Goings, J.; Peng, B.; Petrone, A.; Henderson, T.; Ranasinghe, D.; Zakrzewski, V. G.; Gao, J.; Rega, N.; Zheng, G.; Liang, W.; Hada, M.; Ehara, M.; Toyota, K.; Fukuda, R.; Hasegawa, J.; Ishida, M.; Nakajima, T.; Honda, Y.; Kitao, O.; Nakai, H.; Vreven, T.; Throssell, K.; Montgomery, J. A., Jr.; Peralta, J. E.; Ogliaro, F.; Bearpark, M. J.; Heyd, J. J.; Brothers, E. N.; Kudin, K. N.; Staroverov, V. N.; Keith, T. A.; Kobayashi, R.; Normand, J.; Raghavachari, K.; Rendell, A. P.; Burant, J. C.; Iyengar, S. S.; Tomasi, J.; Cossi, M.; Millam, J. M.; Klene, M.; Adamo, C.; Cammi, R.; Ochterski, J. W.; Martin, R. L.; Morokuma, K.; Farkas, O.; Foresman, J. B.; Fox, D. J. Gaussian, Inc., Wallingford CT, 2013.

**Optimized Structures in Hypothetical Calculation:**

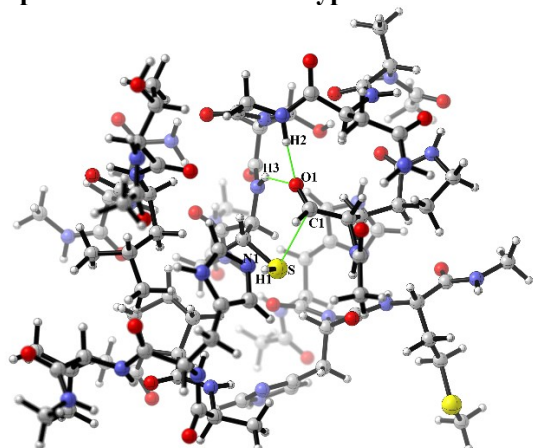

**(Reac-H2O)**

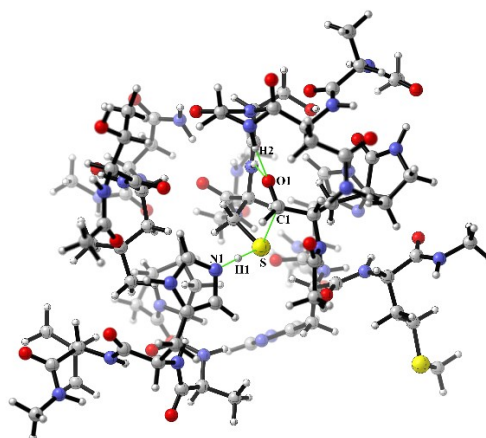

**(TS-1-H2O)**

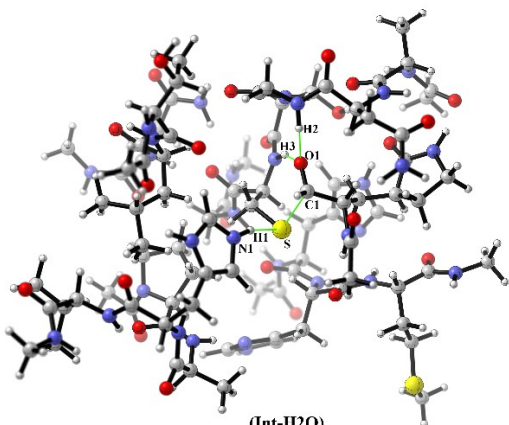

**(Int-H2O)**

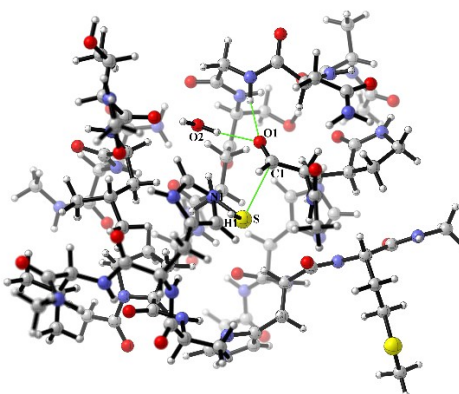

**(Reac-N3)**

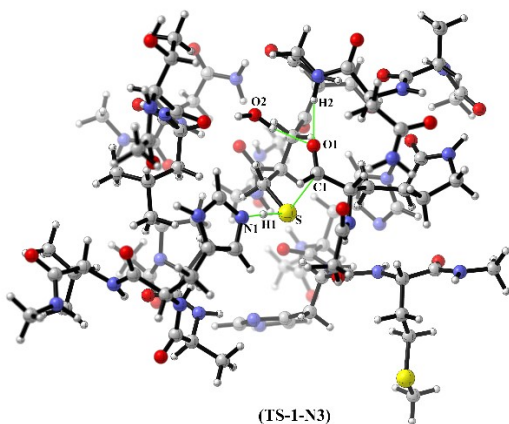

**(TS-1-N3)**

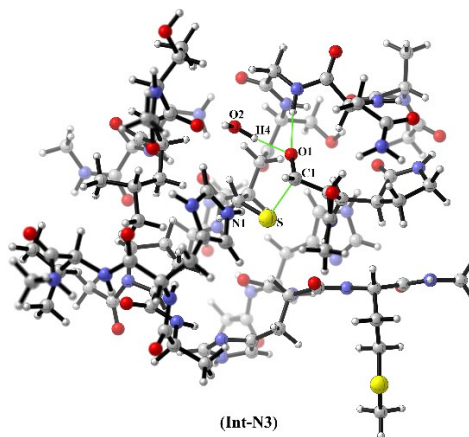

**(Int-N3)**

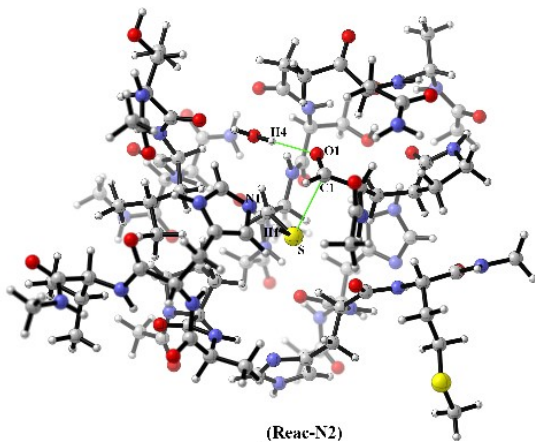

(Reac-N2)

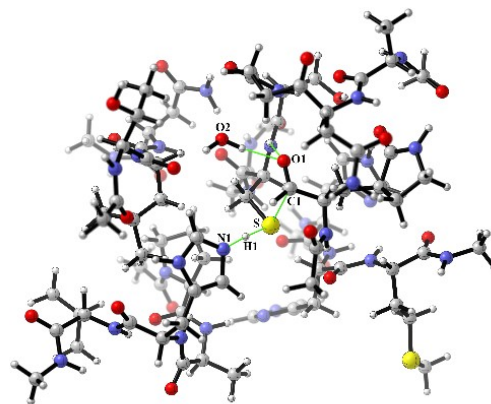

(TS-1-N2)

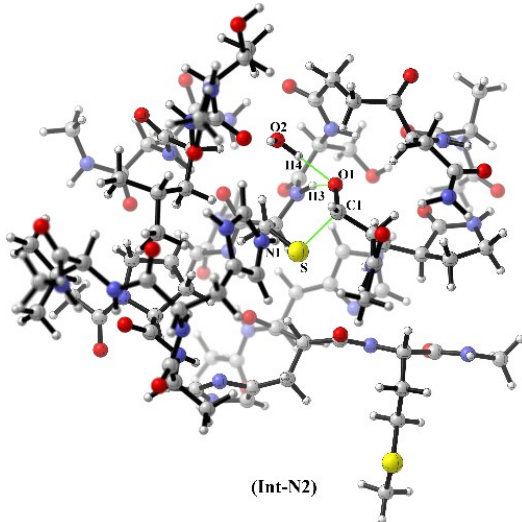

(Int-N2)

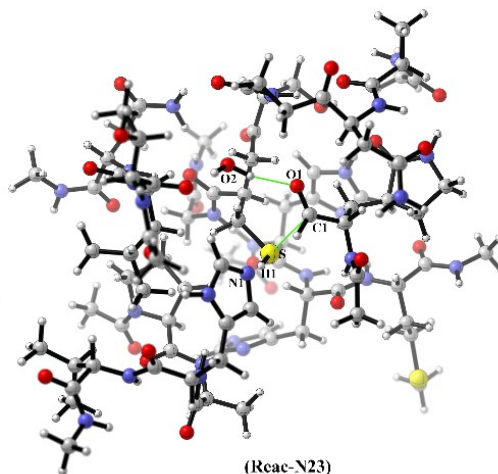

(Reac-N23)

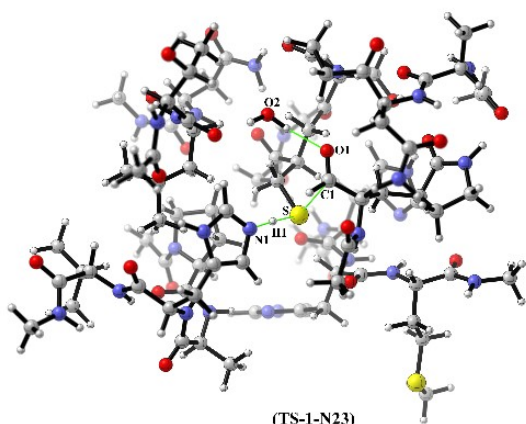

(TS-1-N23)

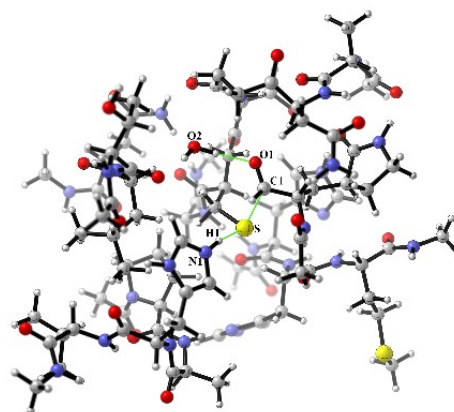

(Int-N23)

## Coordinates for All Optimized Compounds and Transition States:

| R-Com |           |          |          |   |          |          |          |
|-------|-----------|----------|----------|---|----------|----------|----------|
| C     | -5.63679  | -5.21094 | -4.41469 | C | 4.96833  | -3.85606 | -4.30391 |
| C     | -4.80354  | -4.97286 | -3.16331 | O | 6.17471  | -3.68371 | -4.10227 |
| O     | -4.63483  | -3.83280 | -2.72702 | N | 4.26147  | -3.12654 | -5.20231 |
| N     | -4.29917  | -6.08285 | -2.56120 | N | 2.05208  | -4.93639 | -0.91760 |
| C     | -3.77803  | -6.17932 | -1.19994 | C | 1.13214  | -5.56468 | 0.00361  |
| C     | -3.06368  | -4.92145 | -0.69047 | O | 1.02801  | -4.83384 | 1.34926  |
| O     | -2.01137  | -4.52794 | -1.22517 | C | 0.01858  | -4.96971 | 2.04737  |
| C     | -2.77820  | -7.34856 | -1.12719 | N | 2.10057  | -4.07950 | 1.69297  |
| O     | -3.48966  | -8.47299 | -1.66010 | C | 2.23353  | -3.40338 | 2.97306  |
| C     | -2.29364  | -7.61465 | 0.29681  | C | 1.70049  | -1.96201 | 3.00690  |
| N     | -3.59501  | -4.40915 | 0.41929  | O | 1.83438  | -1.29486 | 4.04166  |
| C     | -3.07455  | -3.27771 | 1.16799  | C | 3.69436  | -3.40579 | 3.47424  |
| C     | -3.82621  | -3.30094 | 2.51519  | O | 4.56082  | -2.53879 | 2.75829  |
| O     | -4.69262  | -4.14955 | 2.74091  | N | 1.09697  | -1.47601 | 1.90227  |
| C     | -3.21828  | -1.95101 | 0.39349  | C | 0.56032  | -0.12980 | 1.93411  |
| C     | -4.58458  | -1.67203 | -0.25379 | C | -0.39287 | 0.04638  | 3.13629  |
| C     | -5.75584  | -1.66878 | 0.74046  | O | -1.03340 | -0.90265 | 3.61782  |
| C     | -4.53410  | -0.34654 | -1.02911 | C | -0.23151 | 0.20989  | 0.67142  |
| N     | -3.46667  | -2.33664 | 3.38852  | S | 0.80525  | 0.52047  | -0.81679 |
| C     | -3.92341  | -2.35139 | 4.76483  | N | -0.49102 | 1.30226  | 3.58534  |
| C     | -4.63675  | -1.03562 | 5.09443  | C | -1.23275 | 1.67227  | 4.77862  |
| O     | -4.25770  | 0.04333  | 4.63197  | C | -0.25788 | 1.79093  | 5.95374  |
| C     | -2.73570  | -2.55231 | 5.74258  | O | 0.02275  | 2.88585  | 6.45863  |
| C     | -2.02827  | -3.86030 | 5.37313  | N | 0.29620  | 0.62927  | 6.36499  |
| O     | -2.46785  | -4.93872 | 5.75277  | C | 1.33036  | 0.63013  | 7.38769  |
| N     | -0.94489  | -3.71361 | 4.56244  | C | 1.00556  | 6.26148  | 6.17566  |
| C     | -6.08713  | 3.64435  | 3.89752  | C | 1.55208  | 5.91697  | 4.79231  |
| C     | -5.31709  | 4.14520  | 2.68595  | O | 1.98495  | 6.77768  | 4.02431  |
| O     | -4.98409  | 5.32517  | 2.57421  | N | 1.59070  | 4.58389  | 4.50082  |
| N     | -5.02027  | 3.20338  | 1.73182  | C | 2.44807  | 4.04483  | 3.45735  |
| C     | -3.99449  | 3.52472  | 0.74532  | C | 1.71743  | 3.80004  | 2.12543  |
| C     | -4.52760  | 3.63728  | -0.68422 | O | 0.59725  | 3.27226  | 2.07808  |
| O     | -5.66377  | 3.31867  | -1.02986 | C | 3.05885  | 2.72046  | 3.96039  |
| C     | -2.91355  | 2.40851  | 0.88345  | C | 3.94878  | 2.03491  | 2.97040  |
| C     | -3.44919  | 1.50741  | 2.01119  | N | 4.80101  | 2.71573  | 2.11402  |
| C     | -4.95803  | 1.76284  | 2.00657  | C | 4.10770  | 0.67689  | 2.81742  |
| N     | -3.58263  | 4.10820  | -1.55711 | C | 5.46447  | 1.76571  | 1.46705  |
| C     | -3.97653  | 4.67777  | -2.84346 | N | 5.07812  | 0.52460  | 1.86055  |
| C     | -4.70478  | 3.71730  | -3.79165 | N | 2.39330  | 4.14527  | 1.00659  |
| O     | -5.46203  | 4.17097  | -4.64395 | C | 1.82700  | 3.95690  | -0.31771 |
| C     | -2.73205  | 5.22663  | -3.55336 | C | 2.80285  | 3.51489  | -1.41162 |
| N     | -4.40721  | 2.38860  | -3.69660 | O | 2.32262  | 3.23753  | -2.52102 |
| C     | -4.96157  | 1.42456  | -4.63015 | C | 1.10850  | 5.25149  | -0.83845 |
| C     | -6.09211  | 0.55703  | -4.03505 | C | 0.12459  | 5.81630  | 0.13761  |
| O     | -6.20992  | -0.63138 | -4.33298 | N | -1.24673 | 5.61378  | 0.04843  |
| C     | -3.86834  | 0.56443  | -5.29288 | C | 0.41468  | 6.54826  | 1.26550  |
| C     | -2.99550  | -0.20897 | -4.35605 | C | -1.76600 | 6.21807  | 1.10662  |
| N     | -3.29343  | -1.47303 | -3.88381 | N | -0.79621 | 6.78903  | 1.87011  |
| C     | -1.76425  | 0.08538  | -3.81316 | N | 4.15035  | 3.55535  | -1.22338 |
| C     | -2.26536  | -1.88574 | -3.09916 | C | 5.01899  | 3.58942  | -2.40120 |
| N     | -1.31245  | -0.96332 | -3.03211 | C | 6.47938  | 3.31003  | -2.02896 |
| N     | -6.97521  | 1.22521  | -3.24143 | O | 6.89204  | 3.37635  | -0.87472 |
| C     | -8.03060  | 0.51202  | -2.51474 | C | 4.89664  | 4.95690  | -3.12261 |
| C     | -9.32711  | 0.27262  | -3.32306 | C | 5.35324  | 6.12609  | -2.24901 |
| O     | -10.08978 | -0.62527 | -2.97741 | S | 5.06075  | 7.71197  | -3.12176 |
| C     | -8.30949  | 1.24119  | -1.17038 | C | 5.63209  | 8.85652  | -1.81711 |
| C     | -8.89508  | 2.64757  | -1.36931 | N | 7.27177  | 3.01947  | -3.09990 |
| C     | -9.19633  | 0.40409  | -0.24039 | C | 8.72528  | 2.90385  | -3.02415 |
| C     | 8.65356   | -2.35969 | 2.99575  | C | 3.54173  | 2.28071  | -5.59379 |
| C     | 8.49504   | -3.01300 | 1.63260  | C | 3.77270  | 0.89635  | -5.01510 |
| O     | 9.26957   | -2.77104 | 0.69919  | O | 4.27524  | -0.00784 | -5.68706 |
| N     | 7.49058   | -3.92677 | 1.53590  | C | 6.13461  | -1.53641 | 0.31297  |
| C     | 7.20654   | -4.63854 | 0.30149  | O | 6.51941  | -1.15373 | -0.79962 |
| C     | 5.76260   | -4.41275 | -0.14503 | N | 7.71199  | -1.44881 | -1.34719 |
| O     | 4.85158   | -4.27817 | 0.68894  | C | 7.91990  | -0.85490 | -2.66135 |
| C     | 7.41098   | -6.15577 | 0.47825  | C | 6.48132  | -0.52402 | -3.10568 |
| N     | 5.52733   | -4.50861 | -1.46201 | C | 5.72564  | -0.28204 | -1.78246 |
| C     | 4.17443   | -4.48228 | -2.00417 | C | 4.20454  | -0.57206 | -1.71157 |
| C     | 3.26968   | -5.45976 | -1.22202 | C | 3.48955  | -0.56515 | -3.07335 |
| O     | 3.63909   | -6.59149 | -0.94044 | N | 3.41127  | 0.73762  | -3.70718 |
| C     | 4.18414   | -4.87906 | -3.49326 | C | 2.12290  | -1.23692 | -3.06930 |
|       |           |          |          | O | 1.94348  | -2.38318 | -2.70106 |

|   |           |          |          |   |           |          |          |
|---|-----------|----------|----------|---|-----------|----------|----------|
| H | -5.53437  | -6.21642 | -4.83118 | H | 1.39350   | -0.36361 | 7.83462  |
| H | -1.93152  | -7.08390 | -1.77656 | H | 0.21045   | -0.18853 | 5.77077  |
| H | -1.62374  | -8.48109 | 0.30354  | H | 1.85391   | 6.34833  | 6.86257  |
| H | -3.14124  | -7.83732 | 0.95207  | H | 2.25438   | 2.03123  | 4.24441  |
| H | -1.74031  | -6.76807 | 0.71503  | H | 3.60679   | 2.96091  | 4.88066  |
| H | -2.87504  | -9.21464 | -1.72506 | H | 3.65071   | -0.16326 | 3.31226  |
| H | -4.61229  | -6.41786 | -0.52526 | H | 5.40159   | -0.35956 | 1.46138  |
| H | -4.49751  | -6.98975 | -2.96281 | H | 6.22547   | 1.94150  | 0.72156  |
| H | -2.45927  | -1.95221 | -0.39023 | H | 3.24900   | 4.76849  | 3.28448  |
| H | -2.95162  | -1.13944 | 1.07435  | H | 1.16774   | 3.93872  | 5.16399  |
| H | -4.76195  | -2.46642 | -0.98223 | H | 0.61102   | 4.99426  | -1.77551 |
| H | -5.37939  | -0.28334 | -1.71447 | H | 1.87653   | 6.00127  | -1.06634 |
| H | -4.59163  | 0.51431  | -0.36393 | H | 1.33964   | 6.86022  | 1.72342  |
| H | -3.61597  | -0.25031 | -1.61377 | H | -0.92416  | 7.27805  | 2.74302  |
| H | -6.66605  | -1.31042 | 0.24968  | H | -2.81416  | 6.27336  | 1.37111  |
| H | -5.96367  | -2.66606 | 1.13436  | H | 1.07670   | 3.16940  | -0.23765 |
| H | -5.55517  | -1.01482 | 1.59574  | H | 3.32796   | 4.50933  | 1.13068  |
| H | -2.01207  | -3.44977 | 1.38772  | H | 3.84845   | 5.08274  | -3.40790 |
| H | -4.40447  | -4.83644 | 0.86215  | H | 5.47840   | 4.93240  | -4.05095 |
| H | -3.11672  | -2.64583 | 6.76263  | H | 6.41659   | 6.03813  | -2.00057 |
| H | -2.07291  | -1.68598 | 5.68206  | H | 4.79160   | 6.13058  | -1.30898 |
| H | -0.63553  | -4.51767 | 4.02881  | H | 5.51387   | 9.87114  | -2.20320 |
| H | -0.75869  | -2.80877 | 4.14455  | H | 5.02898   | 8.75017  | -0.91117 |
| H | -4.59544  | -3.20570 | 4.85323  | H | 6.68607   | 8.68789  | -1.57972 |
| H | -2.68412  | -1.71966 | 3.18748  | H | 4.69278   | 2.80890  | -3.08989 |
| H | -5.46594  | 2.98002  | 4.50858  | H | 4.58027   | 3.59975  | -0.30367 |
| H | -1.94330  | 2.85489  | 1.11533  | H | 9.06770   | 2.10221  | -3.68213 |
| H | -2.80713  | 1.85619  | -0.05399 | H | 6.84997   | 3.02702  | -4.01685 |
| H | -3.06297  | 1.82896  | 2.97687  | H | 4.50563   | 2.69697  | -5.90393 |
| H | -3.19311  | 0.45643  | 1.90240  | H | 1.38403   | 0.58208  | 2.06234  |
| H | -5.47267  | 1.23212  | 1.20283  | H | -0.79468  | 1.11780  | 0.86123  |
| H | -5.42192  | 1.48599  | 2.94856  | H | -0.91361  | -0.60342 | 0.43572  |
| H | -3.58186  | 4.49276  | 1.01124  | H | 8.40482   | -1.56253 | -3.33890 |
| H | -3.02134  | 5.68168  | -4.50282 | H | 3.72123   | 0.14262  | -1.04142 |
| H | -2.24003  | 5.97964  | -2.93061 | H | 4.04425   | -1.55088 | -1.25165 |
| H | -2.01724  | 4.42041  | -3.74896 | H | 4.06407   | -1.18859 | -3.76118 |
| H | -4.69657  | 5.49019  | -2.68844 | H | 2.93780   | 1.50602  | -3.23020 |
| H | -2.73134  | 4.50093  | -1.14208 | N | -5.67245  | -1.11294 | 5.96690  |
| H | -3.23363  | 1.23911  | -5.87463 | H | -6.10282  | -0.22096 | 6.17079  |
| H | -4.35800  | -0.11955 | -5.99081 | C | -6.28116  | -2.32280 | 6.51052  |
| H | -1.17679  | 0.98308  | -3.95296 | H | -7.02938  | -2.02802 | 7.24799  |
| H | -2.27095  | -2.84603 | -2.60511 | H | -6.77594  | -2.91777 | 5.73506  |
| H | -5.43691  | 2.03012  | -5.41060 | H | -5.54223  | -2.95216 | 7.01473  |
| H | -3.81515  | 2.06450  | -2.94333 | H | 0.89228   | -2.06526 | 1.09580  |
| H | -7.32582  | 1.36037  | -0.69813 | H | 1.29183   | -0.65734 | -3.51510 |
| H | -9.27585  | 0.89514  | 0.73533  | N | -9.59093  | 1.12266  | -4.35526 |
| H | -10.19962 | 0.28013  | -0.65424 | H | -8.86924  | 1.78491  | -4.60266 |
| H | -8.78525  | -0.59810 | -0.08612 | C | -10.76338 | 0.99028  | -5.19718 |
| H | -9.01808  | 3.13804  | -0.39924 | H | -11.28489 | 1.94863  | -5.28867 |
| H | -9.87531  | 2.60107  | -1.85570 | H | -10.50240 | 0.63372  | -6.20094 |
| H | -8.24228  | 3.29203  | -1.96493 | H | -11.42600 | 0.26273  | -4.72694 |
| H | -7.66910  | -0.49909 | -2.30209 | H | 6.43368   | 0.32216  | -3.79194 |
| H | -6.65918  | 2.10749  | -2.85062 | H | 5.90040   | 0.75297  | -1.46160 |
| H | 9.31432   | -1.49931 | 2.89587  | H | 6.08996   | -1.40191 | -3.62000 |
| H | 7.19280   | -6.68814 | -0.45150 | H | 8.54829   | 0.04230  | -2.58443 |
| H | 6.73760   | -6.53680 | 1.25143  | H | 8.43083   | -1.90892 | -0.78313 |
| H | 7.89977   | -4.25728 | -0.45121 | H | 7.68295   | -2.04075 | 3.39029  |
| H | 6.74660   | -3.89758 | 2.22212  | H | 9.09454   | -3.07271 | 3.69966  |
| H | 3.14755   | -4.96226 | -3.82973 | H | 0.50604   | 7.23072  | 6.13206  |
| H | 4.65899   | -5.85950 | -3.59491 | H | 0.32717   | 5.49539  | 6.56020  |
| H | 4.67478   | -2.30249 | -5.62662 | H | -6.37385  | 4.51166  | 4.49204  |
| H | 3.25646   | -3.19763 | -5.23783 | H | -6.98327  | 3.08948  | 3.60522  |
| H | 3.76281   | -3.47605 | -1.91809 | H | -6.68581  | -5.03823 | -4.15585 |
| H | 6.28440   | -4.45117 | -2.13600 | H | -5.36017  | -4.47148 | -5.16875 |
| H | 1.48046   | -6.58494 | 0.18856  | H | 2.93657   | 2.18022  | -6.49840 |
| H | 0.12430   | -5.60385 | -0.41476 | H | 3.05136   | 2.96256  | -4.89634 |
| H | 1.81931   | -3.98748 | -1.18758 | H | 2.31020   | 0.89341  | 6.97116  |
| H | 4.05819   | -4.44239 | 3.45720  | H | 1.07104   | 1.36282  | 8.15257  |
| H | 3.67990   | -3.04868 | 4.50557  | H | 9.21867   | 3.83949  | -3.30993 |
| H | 4.74418   | -2.93836 | 1.88762  | H | 8.99164   | 2.66762  | -1.99320 |
| H | 1.63364   | -3.94994 | 3.70910  | H | 8.44323   | -6.35452 | 0.77617  |
| H | 2.90878   | -4.08632 | 1.07729  | H | -4.19097  | -1.94469 | -3.95240 |
| H | -2.01984  | 0.93635  | 4.96218  | H | -0.05903  | -0.04977 | -1.70091 |
| H | -1.68198  | 2.65590  | 4.63348  | O | -0.01289  | -2.77823 | -0.53968 |
| H | 0.01392   | 2.05756  | 3.10309  | H | 0.08789   | -2.31991 | -1.38707 |

|             |           |          |          |   |          |          |          |
|-------------|-----------|----------|----------|---|----------|----------|----------|
| H           | -0.75382  | -3.40691 | -0.68055 | O | 6.52528  | -3.01831 | -4.65367 |
|             |           |          |          | N | 4.63450  | -2.11659 | -5.52231 |
|             |           |          |          | N | 2.77846  | -4.93243 | -1.18173 |
| <b>TS-1</b> |           |          |          | C | 2.20152  | -5.78543 | -0.16224 |
| C           | -5.35595  | -4.78230 | -5.07512 | C | 2.18541  | -5.14414 | 1.23476  |
| C           | -4.80123  | -4.64762 | -3.66590 | O | 1.45866  | -5.61011 | 2.10678  |
| O           | -4.74808  | -3.54744 | -3.10747 | N | 3.00874  | -4.06927 | 1.41232  |
| N           | -4.39070  | -5.80305 | -3.08883 | C | 3.15538  | -3.40465 | 2.69697  |
| C           | -3.97071  | -6.01210 | -1.70988 | C | 2.40721  | -2.06262 | 2.80518  |
| C           | -3.21467  | -4.82478 | -1.10547 | O | 2.42582  | -1.43403 | 3.87179  |
| O           | -2.25411  | -4.32124 | -1.70916 | C | 4.63458  | -3.19256 | 3.07449  |
| C           | -3.02819  | -7.23545 | -1.68304 | O | 5.29840  | -2.23777 | 2.26295  |
| O           | -3.76842  | -8.27940 | -2.32760 | N | 1.74716  | -1.64110 | 1.70924  |
| C           | -2.60565  | -7.63455 | -0.27259 | C | 0.93331  | -0.43576 | 1.70023  |
| N           | -3.60562  | -4.49549 | 0.13050  | C | 0.07112  | -0.36963 | 2.96750  |
| C           | -3.04928  | -3.42504 | 0.94616  | O | -0.49420 | -1.38051 | 3.42052  |
| C           | -3.51438  | -3.69436 | 2.38927  | C | -0.03672 | -0.43611 | 0.49599  |
| O           | -4.44149  | -4.47588 | 2.63010  | S | 0.52725  | 0.56752  | -0.93190 |
| C           | -3.47889  | -2.01480 | 0.44942  | N | -0.08316 | 0.84921  | 3.48620  |
| C           | -4.87464  | -1.91358 | -0.18838 | C | -0.83648 | 1.12480  | 4.70059  |
| C           | -6.02317  | -2.25179 | 0.77339  | C | 0.10456  | 1.13838  | 5.89587  |
| C           | -5.09760  | -0.52459 | -0.80319 | O | 0.30174  | 2.15700  | 6.57324  |
| N           | -2.84570  | -2.99563 | 3.32700  | N | 0.72361  | -0.03143 | 6.13958  |
| C           | -3.11950  | -3.14440 | 4.75176  | C | 1.76108  | -0.08535 | 7.14155  |
| C           | -3.94082  | -1.93821 | 5.23104  | C | 0.93991  | 5.61299  | 6.76530  |
| O           | -3.50572  | -0.78717 | 5.13260  | C | 1.40550  | 5.49801  | 5.31317  |
| C           | -1.81139  | -3.24771 | 5.55779  | O | 1.64735  | 6.48509  | 4.61569  |
| C           | -1.02035  | -4.45745 | 5.04381  | N | 1.60640  | 4.22128  | 4.87950  |
| O           | -1.36550  | -5.59525 | 5.34492  | C | 2.42570  | 3.90352  | 3.72354  |
| N           | 0.02251   | -4.16011 | 4.22764  | C | 1.61883  | 3.75235  | 2.41998  |
| C           | -6.04183  | 2.75562  | 4.43392  | O | 0.48466  | 3.25676  | 2.40404  |
| C           | -5.40365  | 3.31230  | 3.16586  | C | 3.19104  | 2.59761  | 4.02855  |
| O           | -5.34842  | 4.52184  | 2.94378  | C | 4.10735  | 2.12405  | 2.94275  |
| N           | -4.87542  | 2.39870  | 2.29042  | N | 4.81613  | 2.97710  | 2.10920  |
| C           | -3.98999  | 2.90655  | 1.23628  | C | 4.45476  | 0.81911  | 2.68502  |
| C           | -4.71873  | 3.28926  | -0.05188 | C | 5.58525  | 2.18159  | 1.37555  |
| O           | -5.86803  | 2.94308  | -0.32390 | N | 5.40134  | 0.87357  | 1.69301  |
| C           | -2.92029  | 1.80383  | 1.02489  | N | 2.24707  | 4.16240  | 1.29062  |
| C           | -3.00671  | 1.02714  | 2.34067  | C | 1.61092  | 4.01215  | -0.01107 |
| C           | -4.49723  | 1.02500  | 2.65518  | C | 2.52727  | 3.70801  | -1.19947 |
| N           | -3.94171  | 4.01990  | -0.90821 | O | 1.98389  | 3.35892  | -2.25939 |
| C           | -4.55389  | 4.77179  | -2.00224 | C | 0.78533  | 5.28865  | -0.40828 |
| C           | -5.24148  | 3.91806  | -3.07681 | C | -0.20199 | 5.71431  | 0.63278  |
| O           | -6.08029  | 4.42467  | -3.81432 | N | -1.55635 | 5.41576  | 0.56418  |
| C           | -3.49163  | 5.65216  | -2.67206 | C | 0.06776  | 6.37715  | 1.80741  |
| N           | -4.82483  | 2.62408  | -3.20230 | C | -2.08583 | 5.89060  | 1.68165  |
| C           | -5.39259  | 1.73027  | -4.19318 | N | -1.13719 | 6.47401  | 2.46192  |
| C           | -6.46067  | 0.76426  | -3.63318 | N | 3.86427  | 3.94848  | -1.15436 |
| O           | -6.58904  | -0.37082 | -4.09061 | C | 4.62148  | 4.03563  | -2.40453 |
| C           | -4.30446  | 0.96173  | -4.97062 | C | 6.13099  | 4.07173  | -2.09354 |
| C           | -3.32984  | 0.23754  | -4.09866 | O | 6.55075  | 4.14117  | -0.94142 |
| N           | -3.44943  | -1.08039 | -3.69343 | C | 4.19083  | 5.28496  | -3.21579 |
| C           | -2.17264  | 0.68907  | -3.51006 | C | 4.48004  | 6.59290  | -2.47819 |
| C           | -2.39813  | -1.38934 | -2.90209 | S | 3.85203  | 8.01304  | -3.45327 |
| N           | -1.60384  | -0.32900 | -2.77379 | C | 4.26624  | 9.35698  | -2.28683 |
| N           | -7.28294  | 1.29223  | -2.68802 | N | 6.94133  | 4.04755  | -3.18898 |
| C           | -8.31929  | 0.47616  | -2.05056 | C | 8.39340  | 4.23188  | -3.13644 |
| C           | -9.55485  | 0.23246  | -2.94095 | C | 1.45572  | 1.68585  | -5.27718 |
| O           | -10.30045 | -0.71169 | -2.69589 | C | 2.15652  | 0.50675  | -4.63191 |
| C           | -8.69246  | 1.10636  | -0.68133 | O | 2.24582  | -0.58474 | -5.20927 |
| C           | -9.38734  | 2.46798  | -0.83521 | O | 6.40593  | -1.08840 | -0.09051 |
| C           | -9.52911  | 0.14701  | 0.17331  | C | 6.49229  | -0.57409 | -1.21214 |
| C           | 9.04782   | -1.80856 | 2.06307  | N | 7.49491  | -0.77649 | -2.08220 |
| C           | 8.97072   | -2.42636 | 0.68246  | C | 7.38957  | -0.00232 | -3.31014 |
| O           | 9.47537   | -1.90969 | -0.31788 | C | 5.91634  | 0.47610  | -3.29735 |
| N           | 8.31982   | -3.62566 | 0.64997  | C | 5.49596  | 0.42896  | -1.81119 |
| C           | 7.91942   | -4.25150 | -0.59479 | C | 4.02652  | 0.11591  | -1.41606 |
| C           | 6.42722   | -4.02245 | -0.82672 | C | 3.11011  | -0.36304 | -2.54211 |
| O           | 5.63519   | -4.03147 | 0.13212  | N | 2.65191  | 0.72928  | -3.38720 |
| C           | 8.16543   | -5.76877 | -0.56260 | C | 1.93633  | -1.22406 | -2.07665 |
| N           | 6.03146   | -3.93150 | -2.09990 | O | 2.10738  | -2.13855 | -1.24709 |
| C           | 4.62035   | -3.94243 | -2.44653 | H | -5.33718 | -5.80217 | -5.46638 |
| C           | 3.97353   | -5.18694 | -1.77117 | H | -2.14528 | -6.96440 | -2.28065 |
| O           | 4.53900   | -6.27165 | -1.78284 | H | -2.00387 | -8.54823 | -0.31053 |
| C           | 4.44002   | -4.01329 | -3.97435 | H | -3.48068 | -7.83003 | 0.35450  |
| C           | 5.29062   | -2.99954 | -4.73611 |   |          |          |          |

|   |           |          |          |             |           |          |          |
|---|-----------|----------|----------|-------------|-----------|----------|----------|
| H | -1.99739  | -6.86036 | 0.20283  | H           | 3.75503   | 2.78191  | 4.95194  |
| H | -3.18425  | -9.04060 | -2.43602 | H           | 4.13974   | -0.10813 | 3.13020  |
| H | -4.85043  | -6.24941 | -1.09596 | H           | 5.80587   | 0.06059  | 1.22044  |
| H | -4.51063  | -6.67081 | -3.59415 | H           | 6.27981   | 2.52111  | 0.62229  |
| H | -2.73734  | -1.68552 | -0.28248 | H           | 3.14046   | 4.72022  | 3.58890  |
| H | -3.40289  | -1.32771 | 1.29336  | H           | 1.28321   | 3.45964  | 5.47242  |
| H | -4.90634  | -2.62881 | -1.01389 | H           | 0.26987   | 5.06581  | -1.34500 |
| H | -5.90875  | -0.58254 | -1.52545 | H           | 1.49461   | 6.10275  | -0.60255 |
| H | -5.36578  | 0.23393  | -0.06330 | H           | 0.98215   | 6.71360  | 2.26969  |
| H | -4.21311  | -0.16739 | -1.33952 | H           | -1.26558  | 6.86988  | 3.38093  |
| H | -6.98589  | -2.13063 | 0.26581  | H           | -3.12922  | 5.83934  | 1.96646  |
| H | -5.96647  | -3.27339 | 1.15348  | H           | 0.91582   | 3.17265  | 0.05512  |
| H | -6.02262  | -1.58400 | 1.64331  | H           | 3.23888   | 4.35897  | 1.38732  |
| H | -1.95650  | -3.48474 | 0.92406  | H           | 3.12122   | 5.19118  | -3.41759 |
| H | -4.37270  | -4.98523 | 0.58165  | H           | 4.69568   | 5.28343  | -4.18868 |
| H | -2.06408  | -3.43367 | 6.60516  | H           | 5.55575   | 6.71821  | -2.30949 |
| H | -1.26272  | -2.30818 | 5.48467  | H           | 3.98627   | 6.58635  | -1.50097 |
| H | 0.44763   | -4.90482 | 3.68223  | H           | 3.94013   | 10.29329 | -2.74447 |
| H | 0.10939   | -3.21901 | 3.86270  | H           | 3.74119   | 9.22586  | -1.33667 |
| H | -3.66089  | -4.08207 | 4.86752  | H           | 5.34403   | 9.40602  | -2.10877 |
| H | -2.06239  | -2.39583 | 3.07587  | H           | 4.40047   | 3.14697  | -3.00646 |
| H | -5.27147  | 2.39709  | 5.12556  | H           | 4.38281   | 4.07970  | -0.29130 |
| H | -1.93751  | 2.24785  | 0.84768  | H           | 8.90000   | 3.41835  | -3.66324 |
| H | -3.16988  | 1.16696  | 0.17240  | H           | 6.50595   | 4.03463  | -4.09930 |
| H | -2.51252  | 1.60950  | 3.11296  | H           | 1.81884   | 1.80069  | -6.30105 |
| H | -2.55938  | 0.03535  | 2.33767  | H           | 1.58317   | 0.44728  | 1.67414  |
| H | -5.04401  | 0.30478  | 2.03887  | H           | -0.98935  | -0.00566 | 0.80093  |
| H | -4.68984  | 0.79634  | 3.70053  | H           | -0.22966  | -1.46672 | 0.19075  |
| H | -3.50215  | 3.80332  | 1.61616  | H           | 7.60778   | -0.63144 | -4.17732 |
| H | -3.95281  | 6.23676  | -3.47026 | H           | 3.56827   | 0.99368  | -0.95316 |
| H | -3.04024  | 6.32840  | -1.94092 | H           | 4.03833   | -0.65404 | -0.63860 |
| H | -2.69671  | 5.03263  | -3.10091 | H           | 3.65655   | -1.06031 | -3.18948 |
| H | -5.35984  | 5.40337  | -1.61008 | H           | 2.42326   | 1.61463  | -2.93393 |
| H | -3.05999  | 4.39624  | -0.54070 | N           | -5.15277  | -2.19265 | 5.77967  |
| H | -3.75121  | 1.68576  | -5.57497 | H           | -5.64101  | -1.36227 | 6.08805  |
| H | -4.80149  | 0.26138  | -5.64464 | C           | -5.87174  | -3.46703 | 5.78574  |
| H | -1.71787  | 1.66743  | -3.56621 | H           | -6.91355  | -3.26898 | 6.04389  |
| H | -2.26432  | -2.36401 | -2.45180 | H           | -5.84087  | -3.93978 | 4.79989  |
| H | -5.92442  | 2.38038  | -4.89744 | H           | -5.46288  | -4.16148 | 6.52756  |
| H | -4.20296  | 2.24847  | -2.49937 | H           | 1.76885   | -2.21917 | 0.87994  |
| H | -7.73740  | 1.27836  | -0.16936 | H           | 1.10724   | -1.27239 | -2.79793 |
| H | -9.72217  | 0.59505  | 1.15381  | N           | -9.77657  | 1.12752  | -3.94128 |
| H | -10.48454 | -0.08110 | -0.30452 | H           | -9.09287  | 1.85963  | -4.06873 |
| H | -9.00599  | -0.80168 | 0.33123  | C           | -10.89950 | 1.02429  | -4.85142 |
| H | -9.55434  | 2.91575  | 0.14887  | H           | -11.51241 | 1.93200  | -4.82561 |
| H | -10.35902 | 2.36167  | -1.32951 | H           | -10.56388 | 0.85527  | -5.88114 |
| H | -8.78715  | 3.17741  | -1.41377 | H           | -11.50475 | 0.17525  | -4.53139 |
| H | -7.92246  | -0.52994 | -1.88228 | H           | 5.81532   | 1.46982  | -3.73722 |
| H | -6.94422  | 2.09802  | -2.17085 | H           | 5.76667   | 1.38268  | -1.34172 |
| H | 9.63924   | -0.89497 | 2.01532  | H           | 5.31384   | -0.21014 | -3.89189 |
| H | 7.82099   | -6.23354 | -1.49012 | H           | 8.09026   | 0.84420  | -3.29576 |
| H | 7.60637   | -6.22125 | 0.26194  | H           | 8.33907   | -1.24772 | -1.75209 |
| H | 8.50853   | -3.78702 | -1.38866 | H           | 8.03167   | -1.57481 | 2.40223  |
| H | 7.73077   | -3.84715 | 1.44299  | H           | 9.49726   | -2.50273 | 2.77978  |
| H | 3.37690   | -3.90643 | -4.20658 | H           | 0.33928   | 6.51681  | 6.87917  |
| H | 4.76150   | -5.00643 | -4.30670 | H           | 0.37801   | 4.73353  | 7.09078  |
| H | 5.21068   | -1.44598 | -6.01169 | H           | -6.59449  | 3.56457  | 4.91133  |
| H | 3.64814   | -1.87888 | -5.42353 | H           | -6.71766  | 1.92284  | 4.22039  |
| H | 4.14986   | -3.03755 | -2.05071 | H           | -6.38546  | -4.41467 | -5.06755 |
| H | 6.69368   | -3.82501 | -2.86438 | H           | -4.78267  | -4.13218 | -5.74155 |
| H | 2.78237   | -6.71082 | -0.12460 | H           | 0.38805   | 1.44924  | -5.33335 |
| H | 1.16089   | -6.02391 | -0.38641 | H           | 1.58272   | 2.61576  | -4.71891 |
| H | 2.42700   | -3.98325 | -1.22741 | H           | 2.66479   | 0.44570  | 6.81746  |
| H | 5.13821   | -4.16850 | 3.04654  | H           | 1.40650   | 0.37850  | 8.06368  |
| H | 4.65886   | -2.80925 | 4.09732  | H           | 8.68205   | 5.18825  | -3.58366 |
| H | 5.51024   | -2.64026 | 1.40140  | H           | 8.69077   | 4.22105  | -2.08772 |
| H | 2.70266   | -4.04778 | 3.45926  | H           | 9.23014   | -5.97140 | -0.42438 |
| H | 3.72602   | -3.90179 | 0.71200  | H           | -4.24549  | -1.70877 | -3.82486 |
| H | -1.62418  | 0.37782  | 4.83347  | H           | -0.58264  | 0.04375  | -1.89555 |
| H | -1.26754  | 2.12295  | 4.62498  | O           | -0.00027  | -3.64685 | -0.30118 |
| H | 0.31227   | 1.67421  | 3.02564  | H           | 0.59414   | -3.11222 | -0.85503 |
| H | 2.01939   | -1.12811 | 7.33230  | H           | -0.74763  | -3.91218 | -0.87206 |
| H | 0.70354   | -0.76008 | 5.43546  |             |           |          |          |
| H | 1.82726   | 5.71017  | 7.39950  | <b>Intl</b> |           |          |          |
| H | 2.47678   | 1.79718  | 4.25551  | C           | -5.22068  | -5.03785 | -5.08484 |

|   |           |          |          |   |          |          |          |
|---|-----------|----------|----------|---|----------|----------|----------|
| C | -4.58655  | -4.80168 | -3.72309 | C | 2.45119  | -4.99411 | 1.36205  |
| O | -4.61383  | -3.68104 | -3.20219 | O | 1.80392  | -5.51555 | 2.26741  |
| N | -4.02711  | -5.89486 | -3.15145 | N | 3.21718  | -3.87831 | 1.51070  |
| C | -3.46771  | -6.04769 | -1.81305 | C | 3.36359  | -3.19062 | 2.78070  |
| C | -2.92398  | -4.75924 | -1.20163 | C | 2.55243  | -1.88396 | 2.90533  |
| O | -2.06026  | -4.09770 | -1.80544 | O | 2.49576  | -1.30733 | 4.00237  |
| C | -2.29011  | -7.04490 | -1.89611 | C | 4.84044  | -2.91985 | 3.12122  |
| O | -2.86065  | -8.22195 | -2.47959 | O | 5.45371  | -1.96891 | 2.26575  |
| C | -1.64884  | -7.32739 | -0.54042 | N | 1.91820  | -1.45086 | 1.80225  |
| N | -3.34139  | -4.51177 | 0.04103  | C | 1.01238  | -0.31745 | 1.80121  |
| C | -2.86638  | -3.42564 | 0.88910  | C | 0.11980  | -0.33163 | 3.04899  |
| C | -3.34366  | -3.75422 | 2.31294  | O | -0.39098 | -1.38340 | 3.47527  |
| O | -4.24699  | -4.57492 | 2.51482  | C | 0.06133  | -0.40887 | 0.58636  |
| C | -3.34739  | -2.03032 | 0.40509  | S | 0.66828  | 0.32754  | -0.97297 |
| C | -4.72367  | -1.97756 | -0.27859 | N | -0.13720 | 0.86610  | 3.58160  |
| C | -5.88506  | -2.41068 | 0.62760  | C | -0.92391 | 1.05770  | 4.79239  |
| C | -4.99941  | -0.57904 | -0.85203 | C | 0.02030  | 1.09468  | 5.98610  |
| N | -2.70596  | -3.07306 | 3.28411  | O | 0.22845  | 2.13559  | 6.62649  |
| C | -3.00154  | -3.29013 | 4.69482  | N | 0.64293  | -0.07276 | 6.22686  |
| C | -3.90313  | -2.15867 | 5.20330  | C | 1.76160  | -0.15189 | 7.13544  |
| O | -3.56475  | -0.97497 | 5.10701  | C | 0.71534  | 5.51226  | 6.80440  |
| C | -1.71215  | -3.34554 | 5.53239  | C | 1.10855  | 5.45205  | 5.32723  |
| C | -0.85010  | -4.50710 | 5.02050  | O | 1.22995  | 6.46375  | 4.63194  |
| O | -1.17603  | -5.66475 | 5.26499  | N | 1.39114  | 4.20047  | 4.86670  |
| N | 0.22525   | -4.14547 | 4.28066  | C | 2.21824  | 3.94859  | 3.69895  |
| C | -6.15919  | 2.39913  | 4.48192  | C | 1.41680  | 3.75962  | 2.39450  |
| C | -5.56915  | 3.04598  | 3.23525  | O | 0.28526  | 3.25594  | 2.38240  |
| O | -5.59799  | 4.26277  | 3.05773  | C | 3.07472  | 2.69785  | 3.99970  |
| N | -4.98297  | 2.20327  | 2.32282  | C | 4.01853  | 2.28080  | 2.91480  |
| C | -4.12304  | 2.81378  | 1.30446  | N | 4.64673  | 3.16895  | 2.05310  |
| C | -4.84978  | 3.18219  | 0.01155  | C | 4.46836  | 1.00389  | 2.67988  |
| O | -5.98236  | 2.79992  | -0.28369 | C | 5.46783  | 2.42055  | 1.32452  |
| C | -2.95898  | 1.81081  | 1.08424  | N | 5.39466  | 1.11156  | 1.67432  |
| C | -3.01616  | 0.97197  | 2.36272  | N | 2.05007  | 4.15390  | 1.26142  |
| C | -4.50892  | 0.84781  | 2.64129  | C | 1.41407  | 3.98127  | -0.03744 |
| N | -4.08615  | 3.95191  | -0.82394 | C | 2.33509  | 3.71263  | -1.22946 |
| C | -4.70800  | 4.72507  | -1.89746 | O | 1.80367  | 3.31769  | -2.27905 |
| C | -5.33810  | 3.90177  | -3.02883 | C | 0.54791  | 5.23454  | -0.43583 |
| O | -6.10417  | 4.44021  | -3.81940 | C | -0.39122 | 5.67544  | 0.64029  |
| C | -3.67213  | 5.68167  | -2.50191 | N | -1.73766 | 5.33894  | 0.67517  |
| N | -4.96051  | 2.59099  | -3.13872 | C | -0.05605 | 6.35867  | 1.78516  |
| C | -5.51531  | 1.72695  | -4.16088 | C | -2.19340 | 5.80703  | 1.82860  |
| C | -6.51693  | 0.68341  | -3.62079 | N | -1.20725 | 6.42715  | 2.52955  |
| O | -6.55554  | -0.45555 | -4.09041 | N | 3.65401  | 4.02910  | -1.19541 |
| C | -4.41704  | 1.04158  | -5.00046 | C | 4.41402  | 4.11021  | -2.44258 |
| C | -3.44680  | 0.26089  | -4.17660 | C | 5.91035  | 4.27340  | -2.11506 |
| N | -3.59782  | -1.07481 | -3.82897 | O | 6.29492  | 4.51236  | -0.97303 |
| C | -2.28746  | 0.66979  | -3.57270 | C | 3.91983  | 5.29287  | -3.31600 |
| C | -2.57748  | -1.46604 | -3.05634 | C | 4.11312  | 6.64821  | -2.63448 |
| N | -1.77071  | -0.41510 | -2.89344 | S | 3.39886  | 7.97840  | -3.67522 |
| N | -7.37103  | 1.13333  | -2.66723 | C | 3.72587  | 9.39914  | -2.57389 |
| C | -8.31596  | 0.22191  | -2.01095 | N | 6.74366  | 4.18044  | -3.18797 |
| C | -9.52190  | -0.17110 | -2.88846 | C | 8.17231  | 4.49626  | -3.13883 |
| O | -10.14397 | -1.19659 | -2.62912 | C | 1.37127  | 1.55864  | -5.20226 |
| C | -8.74604  | 0.83205  | -0.64920 | C | 2.04564  | 0.39227  | -4.50115 |
| C | -9.58428  | 2.10820  | -0.81985 | O | 2.09224  | -0.72613 | -5.03321 |
| C | -9.47137  | -0.19719 | 0.22579  | O | 6.53544  | -0.78172 | -0.05806 |
| C | 9.08731   | -1.55075 | 2.01351  | C | 6.53137  | -0.34037 | -1.21305 |
| C | 9.06117   | -2.14653 | 0.62215  | N | 7.50428  | -0.53736 | -2.11853 |
| O | 9.55035   | -1.59116 | -0.36454 | C | 7.28562  | 0.13586  | -3.39039 |
| N | 8.46518   | -3.37445 | 0.56400  | C | 5.78356  | 0.50798  | -3.33112 |
| C | 8.05072   | -3.96719 | -0.69186 | C | 5.44037  | 0.54897  | -1.82615 |
| C | 6.54808   | -3.75592 | -0.87914 | C | 4.01553  | 0.17075  | -1.33441 |
| O | 5.78753   | -3.74426 | 0.10386  | C | 3.04434  | -0.37965 | -2.37744 |
| C | 8.32525   | -5.47974 | -0.71520 | N | 2.57281  | 0.66647  | -3.28417 |
| N | 6.11140   | -3.70122 | -2.14132 | C | 1.84494  | -1.14398 | -1.75177 |
| C | 4.69163   | -3.77191 | -2.44703 | O | 2.15921  | -2.07769 | -0.87994 |
| C | 4.10527   | -5.01172 | -1.71794 | H | -5.07712 | -6.04777 | -5.47594 |
| O | 4.69258   | -6.08716 | -1.74071 | H | -1.54947 | -6.59698 | -2.57451 |
| C | 4.47492   | -3.90673 | -3.96485 | H | -0.88294 | -8.10220 | -0.64819 |
| C | 5.26974   | -2.89542 | -4.78446 | H | -2.39218 | -7.68309 | 0.17927  |
| O | 6.50742   | -2.88534 | -4.75462 | H | -1.15868 | -6.43781 | -0.13398 |
| N | 4.55734   | -2.04425 | -5.55673 | H | -2.14860 | -8.85358 | -2.64261 |
| N | 2.93937   | -4.75953 | -1.07966 | H | -4.23090 | -6.48665 | -1.15652 |
| C | 2.42444   | -5.62475 | -0.03864 | H | -4.06088 | -6.77253 | -3.65308 |



|   |           |          |          |             |           |          |          |
|---|-----------|----------|----------|-------------|-----------|----------|----------|
| H | -2.59551  | -1.65436 | -0.29555 | H           | 2.87483   | 4.81283  | 3.56251  |
| H | -3.32832  | -1.35840 | 1.26380  | H           | 1.15182   | 3.41641  | 5.47069  |
| H | -4.69330  | -2.66701 | -1.12643 | H           | -0.00049  | 4.97787  | -1.34495 |
| H | -5.77138  | -0.65237 | -1.61492 | H           | 1.23597   | 6.05229  | -0.68267 |
| H | -5.34332  | 0.13394  | -0.09855 | H           | 0.87850   | 6.72554  | 2.17497  |
| H | -4.11113  | -0.14760 | -1.32653 | H           | -1.25073  | 6.79591  | 3.46849  |
| H | -6.83191  | -2.34686 | 0.08115  | H           | -3.21218  | 5.73398  | 2.18655  |
| H | -5.77057  | -3.43341 | 0.99053  | H           | 0.74918   | 3.11736  | 0.02653  |
| H | -5.96585  | -1.76193 | 1.50783  | H           | 3.05500   | 4.30122  | 1.35930  |
| H | -1.77087  | -3.43517 | 0.88800  | H           | 2.86191   | 5.12256  | -3.52856 |
| H | -4.03425  | -5.10287 | 0.49246  | H           | 4.44512   | 5.27867  | -4.27777 |
| H | -1.98341  | -3.56327 | 6.56913  | H           | 5.17567   | 6.85458  | -2.46401 |
| H | -1.20990  | -2.37893 | 5.49256  | H           | 3.61230   | 6.65107  | -1.66083 |
| H | 0.71709   | -4.85497 | 3.74213  | H           | 3.34370   | 10.29103 | -3.07486 |
| H | 0.29843   | -3.19112 | 3.94912  | H           | 3.20790   | 9.28064  | -1.61817 |
| H | -3.48555  | -4.26301 | 4.76408  | H           | 4.79813   | 9.52289  | -2.39881 |
| H | -1.93072  | -2.44909 | 3.06842  | H           | 4.26059   | 3.18287  | -3.00554 |
| H | -5.36322  | 2.05241  | 5.15006  | H           | 4.15867   | 4.25067  | -0.34290 |
| H | -2.01200  | 2.34196  | 0.95955  | H           | 8.75965   | 3.67247  | -3.55396 |
| H | -3.13288  | 1.19185  | 0.19940  | H           | 6.33190   | 4.01342  | -4.09413 |
| H | -2.58014  | 1.55229  | 3.17091  | H           | 1.82729   | 1.69284  | -6.18688 |
| H | -2.49566  | 0.01730  | 2.32316  | H           | 1.57045   | 0.62684  | 1.77339  |
| H | -4.98777  | 0.11650  | 1.98343  | H           | -0.84120  | 0.16410  | 0.80175  |
| H | -4.70813  | 0.55924  | 3.67004  | H           | -0.22191  | -1.45272 | 0.43522  |
| H | -3.72331  | 3.73856  | 1.72009  | H           | 7.50526   | -0.53620 | -4.22451 |
| H | -4.14117  | 6.27805  | -3.28618 | H           | 3.55276   | 1.03566  | -0.85103 |
| H | -3.26999  | 6.34362  | -1.73056 | H           | 4.11011   | -0.58563 | -0.54992 |
| H | -2.83866  | 5.11847  | -2.93554 | H           | 3.54072   | -1.13266 | -2.99529 |
| H | -5.54777  | 5.30448  | -1.49460 | H           | 2.37102   | 1.58279  | -2.88415 |
| H | -3.22114  | 4.34712  | -0.43248 | N           | -5.07017  | -2.51982 | 5.78763  |
| H | -3.86756  | 1.81966  | -5.53603 | H           | -5.61643  | -1.73745 | 6.12306  |
| H | -4.89533  | 0.38921  | -5.73338 | C           | -5.68211  | -3.84884 | 5.78871  |
| H | -1.79445  | 1.62848  | -3.56995 | H           | -6.71874  | -3.74605 | 6.11423  |
| H | -2.45061  | -2.45718 | -2.62942 | H           | -5.67211  | -4.28601 | 4.78596  |
| H | -6.08396  | 2.39249  | -4.82053 | H           | -5.17399  | -4.52976 | 6.47964  |
| H | -4.42062  | 2.18756  | -2.38613 | H           | 2.10576   | -1.87111 | 0.88484  |
| H | -7.81166  | 1.11163  | -0.14594 | H           | 1.19672   | -1.47669 | -2.58231 |
| H | -9.70937  | 0.24561  | 1.19853  | N           | -9.86504  | 0.68521  | -3.88899 |
| H | -10.39796 | -0.53607 | -0.24313 | H           | -9.27660  | 1.49247  | -4.03346 |
| H | -8.84772  | -1.07980 | 0.39892  | C           | -10.97831 | 0.43869  | -4.78444 |
| H | -9.78967  | 2.55422  | 0.15757  | H           | -11.68434 | 1.27597  | -4.77240 |
| H | -10.54313 | 1.88933  | -1.30171 | H           | -10.63573 | 0.28069  | -5.81361 |
| H | -9.06993  | 2.86708  | -1.41863 | H           | -11.48564 | -0.46220 | -4.43749 |
| H | -7.81273  | -0.73235 | -1.82756 | H           | 5.58069   | 1.45168  | -3.84253 |
| H | -7.09093  | 1.96021  | -2.14677 | H           | 5.67190   | 1.55098  | -1.44188 |
| H | 9.65662   | -0.62198 | 1.99718  | H           | 5.20472   | -0.26531 | -3.83391 |
| H | 7.97071   | -5.92089 | -1.65024 | H           | 7.92204   | 1.02883  | -3.47090 |
| H | 7.79087   | -5.97050 | 0.10385  | H           | 8.38353   | -0.95224 | -1.80637 |
| H | 8.61166   | -3.46603 | -1.48398 | H           | 8.05593   | -1.34811 | 2.32543  |
| H | 7.88388   | -3.62954 | 1.35292  | H           | 9.53418   | -2.24522 | 2.73177  |
| H | 3.40325   | -3.84079 | -4.17049 | H           | 0.08742   | 6.38833  | 6.97351  |
| H | 4.82138   | -4.90144 | -4.26578 | H           | 0.20685   | 4.60239  | 7.13279  |
| H | 5.09468   | -1.36018 | -6.07102 | H           | -6.75137  | 3.15326  | 4.99990  |
| H | 3.57282   | -1.82878 | -5.39426 | H           | -6.78947  | 1.53950  | 4.23719  |
| H | 4.19590   | -2.87496 | -2.06570 | H           | -6.29159  | -4.83447 | -4.99778 |
| H | 6.75078   | -3.62605 | -2.92801 | H           | -4.80815  | -4.31611 | -5.79453 |
| H | 3.02368   | -6.53900 | -0.02481 | H           | 0.32321   | 1.29083  | -5.36924 |
| H | 1.37989   | -5.88278 | -0.21762 | H           | 1.42064   | 2.48970  | -4.63419 |
| H | 2.58025   | -3.80015 | -1.11197 | H           | 2.64360   | -0.50666 | 6.59359  |
| H | 5.37695   | -3.87855 | 3.11142  | H           | 1.94858   | 0.84079  | 7.54491  |
| H | 4.87524   | -2.50551 | 4.13218  | H           | 8.38893   | 5.41303  | -3.69635 |
| H | 5.66110   | -2.38790 | 1.41036  | H           | 8.44378   | 4.63843  | -2.09272 |
| H | 2.95592   | -3.84614 | 3.55743  | H           | 9.39606   | -5.66639 | -0.60370 |
| H | 3.85308   | -3.63584 | 0.75769  | H           | -4.41371  | -1.66729 | -3.99498 |
| H | -1.66890  | 0.26301  | 4.89067  | H           | -0.93655  | -0.34044 | -2.26625 |
| H | -1.41310  | 2.03026  | 4.74202  | O           | 0.09006   | -3.65648 | -0.11643 |
| H | 0.19371   | 1.72457  | 3.13117  | H           | 0.81348   | -3.06867 | -0.43517 |
| H | 1.55314   | -0.84076 | 7.96122  | H           | -0.50857  | -3.78116 | -0.87217 |
| H | 0.54812   | -0.81608 | 5.54457  |             |           |          |          |
| H | 1.63140   | 5.62652  | 7.39352  | <b>Int2</b> |           |          |          |
| H | 2.41921   | 1.85041  | 4.23395  | C           | -5.55160  | -5.24195 | -4.64089 |
| H | 3.62798   | 2.92410  | 4.92018  | C           | -5.04774  | -5.05822 | -3.21770 |
| H | 4.23100   | 0.06488  | 3.14647  | O           | -5.19268  | -3.97355 | -2.64679 |
| H | 5.85332   | 0.32254  | 1.20636  | N           | -4.41693  | -6.11531 | -2.64982 |
| H | 6.12170   | 2.79699  | 0.55240  | C           | -3.94871  | -6.18956 | -1.26859 |

|   |           |          |          |   |          |          |          |
|---|-----------|----------|----------|---|----------|----------|----------|
| C | -3.27345  | -4.90124 | -0.78606 | C | 2.08193  | -2.00225 | 2.77016  |
| O | -2.34181  | -4.41666 | -1.45102 | C | 2.03986  | -1.48609 | 3.89936  |
| C | -2.89416  | -7.31244 | -1.18415 | O | 4.09750  | -3.46271 | 3.12831  |
| O | -3.56270  | -8.47806 | -1.68109 | O | 4.95500  | -2.53338 | 2.48626  |
| C | -2.34923  | -7.51603 | 0.22755  | N | 1.63059  | -1.40365 | 1.65797  |
| N | -3.68594  | -4.45656 | 0.40192  | C | 0.94857  | -0.12707 | 1.71339  |
| C | -3.14381  | -3.31735 | 1.13208  | C | -0.05097 | -0.12067 | 2.88456  |
| C | -3.69103  | -3.44933 | 2.56941  | O | -0.74341 | -1.11462 | 3.16535  |
| O | -4.55767  | -4.28498 | 2.84913  | C | 0.11058  | 0.11770  | 0.44572  |
| C | -3.50128  | -1.95354 | 0.48441  | S | 0.94386  | 0.71140  | -1.07035 |
| C | -4.90440  | -1.83722 | -0.13261 | N | -0.15743 | 1.05823  | 3.50523  |
| C | -6.05118  | -2.02860 | 0.87029  | C | -0.96397 | 1.30505  | 4.68515  |
| C | -5.05711  | -0.49426 | -0.86752 | C | -0.03889 | 1.37506  | 5.89535  |
| N | -3.16221  | -2.58118 | 3.45455  | O | 0.13182  | 2.42275  | 6.53259  |
| C | -3.41030  | -2.69390 | 4.88684  | N | 0.59838  | 0.22143  | 6.18931  |
| C | -4.20771  | -1.47206 | 5.35624  | C | 1.57513  | 0.19804  | 7.25776  |
| O | -3.76583  | -0.32821 | 5.21369  | C | 1.03066  | 5.87148  | 6.36190  |
| C | -2.07711  | -2.80530 | 5.65611  | C | 1.56377  | 5.64566  | 4.95555  |
| C | -1.37577  | -4.07033 | 5.15078  | O | 1.94619  | 6.56790  | 4.23349  |
| O | -1.74527  | -5.17889 | 5.52350  | N | 1.65216  | 4.33681  | 4.58739  |
| N | -0.40282  | -3.85647 | 4.22917  | C | 2.51545  | 3.89874  | 3.50355  |
| C | -6.03858  | 3.13869  | 4.14777  | C | 1.76110  | 3.75061  | 2.17225  |
| C | -5.39484  | 3.65223  | 2.86789  | O | 0.64643  | 3.21340  | 2.11581  |
| O | -5.36524  | 4.85076  | 2.58754  | C | 3.15484  | 2.56189  | 3.92281  |
| N | -4.83100  | 2.71491  | 2.04162  | C | 4.10160  | 1.98153  | 2.92284  |
| C | -3.96871  | 3.20774  | 0.96733  | N | 4.89953  | 2.75737  | 2.09659  |
| C | -4.70102  | 3.57261  | -0.31934 | C | 4.40104  | 0.64916  | 2.76076  |
| O | -5.85008  | 3.22398  | -0.59250 | C | 5.67594  | 1.88838  | 1.46140  |
| C | -2.91818  | 2.09797  | 0.73528  | N | 5.41292  | 0.60874  | 1.83631  |
| C | -2.94672  | 1.34457  | 2.06512  | N | 2.38468  | 4.21025  | 1.06411  |
| C | -4.42282  | 1.36101  | 2.45276  | C | 1.76211  | 4.09372  | -0.24520 |
| N | -3.90980  | 4.26864  | -1.18998 | C | 2.69792  | 3.75544  | -1.40735 |
| C | -4.48606  | 4.95337  | -2.34146 | O | 2.18497  | 3.56567  | -2.51848 |
| C | -5.11300  | 4.03324  | -3.39564 | C | 0.96418  | 5.37968  | -0.64714 |
| O | -5.86996  | 4.50145  | -4.23855 | C | -0.04882 | 5.81486  | 0.36748  |
| C | -3.41465  | 5.82207  | -3.01202 | N | -1.41448 | 5.59292  | 0.23124  |
| N | -4.75059  | 2.71337  | -3.37988 | C | 0.19920  | 6.46038  | 1.55632  |
| C | -5.28746  | 1.78436  | -4.35141 | C | -1.97023 | 6.10150  | 1.32063  |
| C | -6.39831  | 0.86055  | -3.80210 | N | -1.03036 | 6.62793  | 2.15002  |
| O | -6.56766  | -0.27092 | -4.27253 | N | 4.05212  | 3.77883  | -1.26353 |
| C | -4.17746  | 0.98225  | -5.06305 | C | 4.86861  | 3.84182  | -2.47535 |
| C | -3.45242  | -0.00487 | -4.20433 | C | 6.34278  | 3.56704  | -2.15655 |
| N | -3.98499  | -1.25591 | -3.92179 | O | 6.77354  | 3.53146  | -1.00743 |
| C | -2.22928  | 0.02587  | -3.58060 | C | 4.70995  | 5.22390  | -3.16293 |
| C | -3.12871  | -1.94632 | -3.16246 | C | 5.21135  | 6.37348  | -2.28803 |
| N | -2.05495  | -1.19156 | -2.95272 | S | 4.88754  | 7.97860  | -3.11373 |
| N | -7.20101  | 1.39498  | -2.85471 | C | 5.54065  | 9.09260  | -1.82106 |
| C | -8.22025  | 0.58747  | -2.17076 | N | 7.12269  | 3.40291  | -3.26171 |
| C | -9.40509  | 0.15569  | -3.05778 | C | 8.57437  | 3.27288  | -3.22171 |
| O | -10.05475 | -0.83578 | -2.74065 | C | 2.73527  | 1.76108  | -5.45175 |
| C | -8.67461  | 1.33907  | -0.89019 | C | 3.02162  | 0.51538  | -4.63106 |
| C | -9.41993  | 2.64328  | -1.21172 | O | 3.20520  | -0.57900 | -5.17911 |
| C | -9.50332  | 0.43418  | 0.02914  | O | 6.40583  | -1.46632 | 0.24389  |
| C | 8.85582   | -2.30247 | 2.50423  | C | 6.56540  | -1.02601 | -0.90255 |
| C | 8.71772   | -3.00648 | 1.16469  | N | 7.56122  | -1.38566 | -1.73018 |
| O | 9.37429   | -2.68520 | 0.17046  | C | 7.56923  | -0.66571 | -2.99640 |
| N | 7.85370   | -4.06460 | 1.17090  | C | 6.14096  | -0.07396 | -3.06206 |
| C | 7.50709   | -4.78542 | -0.04197 | C | 5.69826  | 0.03685  | -1.58659 |
| C | 6.10105   | -4.40057 | -0.50357 | C | 4.19555  | -0.06291 | -1.20571 |
| O | 5.19263   | -4.25196 | 0.33215  | C | 3.22239  | -0.39627 | -2.33607 |
| C | 7.52817   | -6.30424 | 0.19374  | N | 3.09140  | 0.70446  | -3.29076 |
| N | 5.89362   | -4.33476 | -1.82263 | C | 1.82457  | -0.85039 | -1.83932 |
| C | 4.57029   | -4.06687 | -2.36352 | O | 1.86472  | -1.91252 | -1.01478 |
| C | 3.56151   | -5.09226 | -1.78188 | H | -5.47178 | -6.26575 | -5.01505 |
| O | 3.83881   | -6.28334 | -1.71418 | H | -2.07546 | -7.02330 | -1.85972 |
| C | 4.57283   | -4.18636 | -3.89837 | H | -1.69545 | -8.39442 | 0.24386  |
| C | 5.69355   | -3.40498 | -4.57433 | H | -3.16097 | -7.68513 | 0.94151  |
| O | 6.88023   | -3.65035 | -4.32191 | H | -1.75327 | -6.66056 | 0.56101  |
| N | 5.32045   | -2.47441 | -5.48274 | H | -2.91749 | -9.19500 | -1.73050 |
| N | 2.39142   | -4.52655 | -1.40140 | H | -4.78635 | -6.45231 | -0.60889 |
| C | 1.43924   | -5.20932 | -0.55325 | H | -4.40638 | -7.00664 | -3.12754 |
| C | 1.37382   | -4.63051 | 0.87193  | H | -2.75670 | -1.76176 | -0.28908 |
| O | 0.34388   | -4.76671 | 1.54127  | H | -3.36076 | -1.17944 | 1.24115  |
| N | 2.49827   | -4.01448 | 1.30614  | H | -4.99480 | -2.62663 | -0.88157 |
| C | 2.63899   | -3.43034 | 2.63088  | H | -5.83707 | -0.57698 | -1.62335 |

|   |           |          |          |             |           |          |          |
|---|-----------|----------|----------|-------------|-----------|----------|----------|
| H | -5.33237  | 0.32637  | -0.19855 | H           | 1.10878   | 6.75340  | 2.05723  |
| H | -4.13509  | -0.20190 | -1.38086 | H           | -1.19071  | 7.05084  | 3.05156  |
| H | -7.01597  | -1.88558 | 0.37219  | H           | -3.02732  | 6.11615  | 1.55286  |
| H | -6.04924  | -3.02618 | 1.31408  | H           | 1.05539   | 3.26642  | -0.18069 |
| H | -5.98908  | -1.30449 | 1.69144  | H           | 3.31932   | 4.57881  | 1.17655  |
| H | -2.05085  | -3.40769 | 1.17780  | H           | 3.65007   | 5.35377  | -3.39505 |
| H | -4.42200  | -4.93806 | 0.91248  | H           | 5.24521   | 5.22100  | -4.11914 |
| H | -2.28891  | -2.92845 | 6.72137  | H           | 6.28559   | 6.27836  | -2.09374 |
| H | -1.48813  | -1.89747 | 5.50944  | H           | 4.69525   | 6.35945  | -1.32254 |
| H | -0.13583  | -4.62475 | 3.62595  | H           | 5.41146   | 10.11567 | -2.18046 |
| H | -0.28422  | -2.93261 | 3.82829  | H           | 4.98736   | 8.97370  | -0.88538 |
| H | -3.95839  | -3.62273 | 5.03601  | H           | 6.60441   | 8.91031  | -1.64507 |
| H | -2.39826  | -1.96558 | 3.17957  | H           | 4.51753   | 3.07301  | -3.17132 |
| H | -5.27344  | 2.81611  | 4.86260  | H           | 4.52207   | 3.71696  | -0.36412 |
| H | -1.94757  | 2.54227  | 0.50412  | H           | 8.89582   | 2.40119  | -3.79854 |
| H | -3.20534  | 1.44304  | -0.09199 | H           | 6.68278   | 3.47698  | -4.16679 |
| H | -2.39314  | 1.92494  | 2.79989  | H           | 3.59888   | 1.96215  | -6.09372 |
| H | -2.51488  | 0.34719  | 2.03146  | H           | 1.66745   | 0.68792  | 1.85016  |
| H | -4.99223  | 0.60883  | 1.89751  | H           | -0.56369  | 0.94647  | 0.65920  |
| H | -4.57064  | 1.18066  | 3.51586  | H           | -0.48796  | -0.76655 | 0.22784  |
| H | -3.46561  | 4.10441  | 1.32722  | H           | 7.77855   | -1.35220 | -3.82105 |
| H | -3.85404  | 6.35291  | -3.85820 | H           | 3.87422   | 0.87117  | -0.73790 |
| H | -3.01024  | 6.54530  | -2.29885 | H           | 4.07658   | -0.83196 | -0.43667 |
| H | -2.58797  | 5.20120  | -3.37289 | H           | 3.58690   | -1.24994 | -2.91243 |
| H | -5.31937  | 5.58645  | -2.01377 | H           | 2.79394   | 1.60909  | -2.93295 |
| H | -3.01109  | 4.62378  | -0.84578 | N           | -5.40698  | -1.70496 | 5.94416  |
| H | -3.45862  | 1.69846  | -5.46794 | H           | -5.88433  | -0.86408 | 6.24089  |
| H | -4.63016  | 0.44973  | -5.90373 | C           | -6.12124  | -2.97874 | 6.02366  |
| H | -1.47542  | 0.79609  | -3.53268 | H           | -7.15106  | -2.77406 | 6.32141  |
| H | -3.29249  | -2.92994 | -2.75286 | H           | -6.13471  | -3.48641 | 5.05485  |
| H | -5.77527  | 2.41602  | -5.10344 | H           | -5.67767  | -3.64892 | 6.76773  |
| H | -4.18888  | 2.37186  | -2.61252 | H           | 1.80357   | -1.78009 | 0.71332  |
| H | -7.74873  | 1.60536  | -0.36391 | H           | 1.21610   | -1.02628 | -2.74539 |
| H | -9.75227  | 0.97105  | 0.95033  | H           | 0.36930   | -2.36442 | -1.07374 |
| H | -10.43015 | 0.11597  | -0.45376 | N           | -9.70612  | 0.94097  | -4.12641 |
| H | -8.94873  | -0.46908 | 0.30204  | H           | -9.08944  | 1.71455  | -4.32695 |
| H | -9.64917  | 3.18049  | -0.28686 | C           | -10.77788 | 0.62618  | -5.05105 |
| H | -10.36293 | 2.44128  | -1.73071 | H           | -11.35316 | -0.19449 | -4.62123 |
| H | -8.82552  | 3.31697  | -1.83734 | H           | -11.43377 | 1.49099  | -5.19437 |
| H | -7.77318  | -0.36633 | -1.87601 | H           | -10.38742 | 0.31251  | -6.02642 |
| H | -6.86505  | 2.22206  | -2.36721 | H           | 6.12270   | 0.88583  | -3.58096 |
| H | 9.28884   | -2.97874 | 3.24782  | H           | 6.08324   | 0.98401  | -1.18957 |
| H | 7.24498   | -6.83885 | -0.71729 | H           | 5.49243   | -0.75513 | -3.61093 |
| H | 6.81064   | -6.57060 | 0.97566  | H           | 8.33473   | 0.12305  | -2.98592 |
| H | 8.24771   | -4.50690 | -0.79491 | H           | 8.34010   | -1.92899 | -1.35632 |
| H | 7.15534   | -4.08375 | 1.90406  | H           | 9.50085   | -1.43330 | 2.38118  |
| H | 3.58981   | -3.88437 | -4.26912 | H           | 7.86882   | -1.98564 | 2.85867  |
| H | 4.72343   | -5.24158 | -4.15112 | H           | 0.49517   | 6.82186  | 6.39767  |
| H | 6.07169   | -1.93186 | -5.88639 | H           | 0.38745   | 5.05510  | 6.70166  |
| H | 4.40466   | -2.02767 | -5.45962 | H           | -6.61125  | 3.95549  | 4.58650  |
| H | 4.26411   | -3.05826 | -2.06353 | H           | -6.69606  | 2.28551  | 3.95757  |
| H | 6.66244   | -4.34751 | -2.48921 | H           | -6.59479  | -4.92019 | -4.67526 |
| H | 1.72726   | -6.26344 | -0.48948 | H           | -4.97950  | -4.58018 | -5.29796 |
| H | 0.42343   | -5.15788 | -0.95757 | H           | 1.88938   | 1.55350  | -6.11217 |
| H | 2.29865   | -3.49657 | -1.42225 | H           | 2.51712   | 2.63881  | -4.83931 |
| H | 4.47264   | -4.49076 | 3.03112  | H           | 2.50237   | 0.71266  | 6.97533  |
| H | 4.07722   | -3.18901 | 4.18560  | H           | 1.16428   | 0.69844  | 8.13623  |
| H | 5.15361   | -2.85817 | 1.58960  | H           | 9.06358   | 4.16810  | -3.61974 |
| H | 2.04577   | -4.02358 | 3.33379  | H           | 8.86734   | 3.14080  | -2.17971 |
| H | 3.31181   | -4.00443 | 0.69596  | H           | 8.52687   | -6.61998 | 0.50486  |
| H | -1.72607  | 0.52961  | 4.79666  | O           | -0.63502  | -2.37303 | -1.19491 |
| H | -1.44986  | 2.27879  | 4.60210  | H           | -1.28869  | -1.55914 | -2.28164 |
| H | 0.29984   | 1.87802  | 3.08982  | H           | -1.04705  | -3.25683 | -1.14108 |
| H | 1.81029   | -0.83903 | 7.50269  | H           | -4.95560  | -1.50458 | -4.11017 |
| H | 0.65693   | -0.50499 | 5.48203  |             |           |          |          |
| H | 1.88582   | 5.94086  | 7.04257  | <b>TS-2</b> |           |          |          |
| H | 2.37381   | 1.82528  | 4.14337  | C           | -5.55991  | -5.31771 | -4.55201 |
| H | 3.67136   | 2.75811  | 4.87182  | C           | -5.03417  | -5.13330 | -3.13620 |
| H | 4.00743   | -0.24064 | 3.22240  | O           | -5.22397  | -4.07186 | -2.53835 |
| H | 5.79625   | -0.24345 | 1.41495  | N           | -4.32628  | -6.15979 | -2.59948 |
| H | 6.43055   | 2.15172  | 0.73662  | C           | -3.85522  | -6.21636 | -1.21846 |
| H | 3.30016   | 4.64951  | 3.37829  | C           | -3.20863  | -4.90986 | -0.74332 |
| H | 1.27754   | 3.63721  | 5.22265  | O           | -2.26674  | -4.42785 | -1.39853 |
| H | 0.47244   | 5.17057  | -1.59897 | C           | -2.77788  | -7.31573 | -1.12535 |
| H | 1.68470   | 6.18894  | -0.81963 | O           | -3.42131  | -8.49956 | -1.61193 |

|   |           |          |          |   |          |          |          |
|---|-----------|----------|----------|---|----------|----------|----------|
| C | -2.22903  | -7.49449 | 0.28826  | N | 1.60002  | -1.39521 | 1.66114  |
| N | -3.65075  | -4.44898 | 0.42647  | C | 0.93291  | -0.11138 | 1.72155  |
| C | -3.13885  | -3.29312 | 1.15212  | C | -0.09783 | -0.09766 | 2.89253  |
| C | -3.70040  | -3.42232 | 2.58427  | O | -0.76289 | -1.08858 | 3.17667  |
| O | -4.55169  | -4.27252 | 2.86357  | C | 0.10112  | 0.15609  | 0.45518  |
| C | -3.51157  | -1.94051 | 0.49011  | S | 0.94469  | 0.76289  | -1.04780 |
| C | -4.91191  | -1.84554 | -0.13567 | N | -0.16987 | 1.08537  | 3.50559  |
| C | -6.06255  | -2.03007 | 0.86380  | C | -0.97716 | 1.34377  | 4.68258  |
| C | -5.06657  | -0.51559 | -0.89297 | C | -0.04864 | 1.43705  | 5.88902  |
| N | -3.19956  | -2.53307 | 3.46646  | O | 0.13033  | 2.49876  | 6.50004  |
| C | -3.44756  | -2.64576 | 4.89820  | N | 0.58400  | 0.28727  | 6.20826  |
| C | -4.22660  | -1.41292 | 5.37036  | C | 1.56645  | 0.28188  | 7.27261  |
| O | -3.77573  | -0.27493 | 5.21021  | C | 1.03237  | 5.94267  | 6.29426  |
| C | -2.11381  | -2.77410 | 5.66598  | C | 1.58007  | 5.69806  | 4.89762  |
| C | -1.42245  | -4.04400 | 5.15911  | O | 1.98387  | 6.60825  | 4.17204  |
| O | -1.78876  | -5.14968 | 5.54229  | N | 1.65473  | 4.38486  | 4.54247  |
| N | -0.45894  | -3.83811 | 4.22463  | C | 2.52524  | 3.92755  | 3.47290  |
| C | -6.03972  | 3.19008  | 4.11402  | C | 1.77987  | 3.76306  | 2.13940  |
| C | -5.38891  | 3.69066  | 2.83228  | O | 0.67830  | 3.19967  | 2.07966  |
| O | -5.34675  | 4.88764  | 2.54659  | C | 3.15371  | 2.59351  | 3.91485  |
| N | -4.83487  | 2.74356  | 2.01089  | C | 4.09772  | 1.99330  | 2.92453  |
| C | -3.97246  | 3.22114  | 0.92971  | N | 4.90211  | 2.75339  | 2.09033  |
| C | -4.70714  | 3.58122  | -0.35722 | C | 4.38487  | 0.65649  | 2.77654  |
| O | -5.86020  | 3.24033  | -0.62081 | C | 5.67034  | 1.87106  | 1.46403  |
| C | -2.93273  | 2.10069  | 0.70296  | N | 5.39568  | 0.59769  | 1.85219  |
| C | -2.95998  | 1.36159  | 2.04094  | N | 2.39524  | 4.23616  | 1.03268  |
| C | -4.43609  | 1.38912  | 2.42933  | C | 1.77457  | 4.11731  | -0.27641 |
| N | -3.91442  | 4.26387  | -1.23686 | C | 2.71184  | 3.76157  | -1.43200 |
| C | -4.49067  | 4.93961  | -2.39385 | O | 2.20294  | 3.56949  | -2.54463 |
| C | -5.13522  | 4.01160  | -3.43058 | C | 0.98183  | 5.40310  | -0.68467 |
| O | -5.90912  | 4.47525  | -4.26097 | C | -0.04101 | 5.83348  | 0.32266  |
| C | -3.41361  | 5.78590  | -3.08345 | N | -1.40457 | 5.60726  | 0.17329  |
| N | -4.76830  | 2.69433  | -3.41520 | C | 0.19399  | 6.48018  | 1.51370  |
| C | -5.30623  | 1.75977  | -4.38203 | C | -1.97245 | 6.11609  | 1.25598  |
| C | -6.41889  | 0.84267  | -3.82476 | N | -1.04227 | 6.64562  | 2.09458  |
| O | -6.60776  | -0.28281 | -4.30063 | N | 4.06556  | 3.76679  | -1.27987 |
| C | -4.19552  | 0.95312  | -5.08782 | C | 4.88710  | 3.81831  | -2.48880 |
| C | -3.47852  | -0.04151 | -4.23001 | C | 6.35534  | 3.51394  | -2.17216 |
| N | -4.02066  | -1.28803 | -3.95859 | O | 6.78888  | 3.47217  | -1.02442 |
| C | -2.25512  | -0.03313 | -3.60123 | C | 4.75542  | 5.20531  | -3.17242 |
| C | -3.15937  | -1.98280 | -3.19863 | C | 5.27674  | 6.34300  | -2.29363 |
| N | -2.07494  | -1.25110 | -2.97340 | S | 4.98777  | 7.95564  | -3.11743 |
| N | -7.20581  | 1.37870  | -2.86373 | C | 5.65798  | 9.05428  | -1.82038 |
| C | -8.21967  | 0.57632  | -2.16675 | N | 7.12817  | 3.33000  | -3.27971 |
| C | -9.39844  | 0.11685  | -3.04704 | C | 8.57939  | 3.19287  | -3.24444 |
| O | -10.04092 | -0.87368 | -2.71212 | C | 2.85786  | 1.75092  | -5.45439 |
| C | -8.68313  | 1.34950  | -0.90247 | C | 3.08973  | 0.50126  | -4.62347 |
| C | -9.43777  | 2.64097  | -1.25211 | O | 3.28374  | -0.59559 | -5.16146 |
| C | -9.50605  | 0.45624  | 0.03328  | O | 6.38673  | -1.48135 | 0.28487  |
| C | 8.84672   | -2.29948 | 2.56184  | C | 6.54136  | -1.05051 | -0.86579 |
| C | 8.70044   | -3.00237 | 1.22173  | N | 7.54749  | -1.40000 | -1.68490 |
| O | 9.36072   | -2.68736 | 0.22801  | C | 7.54087  | -0.70206 | -2.96333 |
| N | 7.82679   | -4.05295 | 1.22637  | C | 6.09877  | -0.14789 | -3.04101 |
| C | 7.48849   | -4.78193 | 0.01596  | C | 5.65289  | -0.01761 | -1.56814 |
| C | 6.08868   | -4.39938 | -0.46689 | C | 4.15148  | -0.14077 | -1.18477 |
| O | 5.16873   | -4.24165 | 0.35427  | C | 3.17341  | -0.41987 | -2.32730 |
| C | 7.50284   | -6.29906 | 0.26449  | N | 3.10252  | 0.68840  | -3.27979 |
| N | 5.89731   | -4.34667 | -1.78966 | C | 1.74595  | -0.79520 | -1.85730 |
| C | 4.58224   | -4.07818 | -2.35003 | O | 1.70855  | -1.89533 | -1.06196 |
| C | 3.55859   | -5.08540 | -1.76366 | H | -5.44445 | -6.33195 | -4.94280 |
| O | 3.82443   | -6.27738 | -1.67762 | H | -1.96516 | -7.01565 | -1.80335 |
| C | 4.59908   | -4.22403 | -3.88270 | H | -1.55505 | -8.35742 | 0.31238  |
| C | 5.72767   | -3.45532 | -4.56002 | H | -3.03726 | -7.67651 | 1.00303  |
| O | 6.91080   | -3.69715 | -4.28922 | H | -1.65331 | -6.62234 | 0.61434  |
| N | 5.36564   | -2.54065 | -5.48929 | H | -2.76159 | -9.20380 | -1.65090 |
| N | 2.38752   | -4.50798 | -1.40197 | H | -4.68664 | -6.49039 | -0.55528 |
| C | 1.41404   | -5.17859 | -0.56732 | H | -4.28809 | -7.04919 | -3.07922 |
| C | 1.34304   | -4.60675 | 0.85993  | H | -2.77059 | -1.74284 | -0.28474 |
| O | 0.30669   | -4.73309 | 1.52105  | H | -3.38436 | -1.15825 | 1.24063  |
| N | 2.46901   | -4.00044 | 1.30519  | H | -4.99061 | -2.64701 | -0.87237 |
| C | 2.60136   | -3.42580 | 2.63525  | H | -5.84232 | -0.61472 | -1.65108 |
| C | 2.05592   | -1.99397 | 2.77338  | H | -5.34894 | 0.31434  | -0.23783 |
| O | 2.02518   | -1.47084 | 3.89833  | H | -4.14411 | -0.23075 | -1.40901 |
| C | 4.05410   | -3.47207 | 3.14835  | H | -7.02548 | -1.90340 | 0.35775  |
| O | 4.92517   | -2.54536 | 2.52133  | H | -6.05568 | -3.02065 | 1.32347  |

|   |           |          |          |                |           |          |          |
|---|-----------|----------|----------|----------------|-----------|----------|----------|
| H | -6.01131  | -1.29183 | 1.67329  | H              | 3.31047   | 4.64888  | 1.14754  |
| H | -2.04536  | -3.36713 | 1.21399  | H              | 3.69843   | 5.35543  | -3.40593 |
| H | -4.39492  | -4.93006 | 0.92524  | H              | 5.29183   | 5.19539  | -4.12797 |
| H | -2.32436  | -2.89717 | 6.73148  | H              | 6.34813   | 6.22592  | -2.09557 |
| H | -1.51659  | -1.87150 | 5.51911  | H              | 4.75720   | 6.33754  | -1.32985 |
| H | -0.19622  | -4.61275 | 3.62837  | H              | 5.55062   | 10.08024 | -2.17873 |
| H | -0.33843  | -2.91698 | 3.81792  | H              | 5.09872   | 8.94515  | -0.88707 |
| H | -4.00831  | -3.56738 | 5.04547  | H              | 6.71720   | 8.85054  | -1.64059 |
| H | -2.44050  | -1.91104 | 3.19386  | H              | 4.52233   | 3.05949  | -3.18811 |
| H | -5.27905  | 2.86297  | 4.83162  | H              | 4.52780   | 3.70722  | -0.37624 |
| H | -1.96079  | 2.53529  | 0.45950  | H              | 8.89573   | 2.34048  | -3.85171 |
| H | -3.23043  | 1.43896  | -0.11503 | H              | 6.68809   | 3.42084  | -4.18324 |
| H | -2.40207  | 1.94605  | 2.76968  | H              | 3.75718   | 1.94800  | -6.04695 |
| H | -2.53325  | 0.36183  | 2.01567  | H              | 1.66183   | 0.69306  | 1.86459  |
| H | -5.00985  | 0.63778  | 1.87704  | H              | -0.56334  | 0.98993  | 0.67707  |
| H | -4.58535  | 1.21576  | 3.49338  | H              | -0.51086  | -0.71530 | 0.22357  |
| H | -3.46043  | 4.11614  | 1.28112  | H              | 7.76899   | -1.39670 | -3.77601 |
| H | -3.85291  | 6.31103  | -3.93331 | H              | 3.83239   | 0.77100  | -0.67361 |
| H | -2.99473  | 6.51385  | -2.38337 | H              | 4.03654   | -0.94256 | -0.44868 |
| H | -2.59777  | 5.14987  | -3.44263 | H              | 3.50161   | -1.28662 | -2.90581 |
| H | -5.31429  | 5.58669  | -2.06941 | H              | 2.80400   | 1.59701  | -2.93287 |
| H | -3.01299  | 4.61675  | -0.89992 | N              | -5.41783  | -1.62811 | 5.98087  |
| H | -3.47301  | 1.66839  | -5.48854 | H              | -5.88258  | -0.77984 | 6.27647  |
| H | -4.64779  | 0.42734  | -5.93331 | C              | -6.13931  | -2.89523 | 6.09072  |
| H | -1.50111  | 0.73838  | -3.55909 | H              | -7.15616  | -2.68079 | 6.42380  |
| H | -3.34567  | -2.96540 | -2.79949 | H              | -6.19204  | -3.40740 | 5.12558  |
| H | -5.79545  | 2.38694  | -5.13681 | H              | -5.67535  | -3.56611 | 6.82148  |
| H | -4.17750  | 2.35827  | -2.66733 | H              | 1.74221   | -1.78849 | 0.72318  |
| H | -7.76072  | 1.63354  | -0.37929 | H              | 1.14385   | -0.92133 | -2.77401 |
| H | -9.76349  | 1.00987  | 0.94223  | H              | 0.38219   | -2.26704 | -1.15209 |
| H | -10.42803 | 0.11864  | -0.44578 | N              | -9.70431  | 0.87902  | -4.13054 |
| H | -8.94322  | -0.43547 | 0.32682  | H              | -9.08781  | 1.64762  | -4.34976 |
| H | -9.67291  | 3.19588  | -0.33915 | C              | -10.76080 | 0.52752  | -5.05918 |
| H | -10.37815 | 2.42086  | -1.76851 | H              | -11.34698 | -0.27184 | -4.60461 |
| H | -8.84685  | 3.30473  | -1.89142 | H              | -11.40980 | 1.38796  | -5.25114 |
| H | -7.76685  | -0.36777 | -1.85051 | H              | -10.35527 | 0.16983  | -6.01322 |
| H | -6.85992  | 2.20337  | -2.37943 | H              | 6.05716   | 0.80041  | -3.57903 |
| H | 9.28288   | -2.97770 | 3.30177  | H              | 6.01791   | 0.94512  | -1.19033 |
| H | 7.22841   | -6.84087 | -0.64495 | H              | 5.46676   | -0.85464 | -3.57655 |
| H | 6.77641   | -6.55714 | 1.04097  | H              | 8.28569   | 0.10607  | -2.96482 |
| H | 8.23777   | -4.51185 | -0.73147 | H              | 8.33289   | -1.92855 | -1.30339 |
| H | 7.12718   | -4.06794 | 1.95832  | H              | 9.49298   | -1.43173 | 2.43568  |
| H | 3.62006   | -3.92729 | -4.26806 | H              | 7.86280   | -1.98070 | 2.92293  |
| H | 4.75005   | -5.28364 | -4.11572 | H              | 0.50352   | 6.89728  | 6.31396  |
| H | 6.12191   | -2.00336 | -5.89077 | H              | 0.37945   | 5.13484  | 6.63575  |
| H | 4.45296   | -2.08888 | -5.47697 | H              | -6.60442  | 4.01500  | 4.54783  |
| H | 4.28327   | -3.06043 | -2.07352 | H              | -6.70586  | 2.34302  | 3.92666  |
| H | 6.67403   | -4.36705 | -2.44698 | H              | -6.61587  | -5.03933 | -4.55988 |
| H | 1.68443   | -6.23738 | -0.50663 | H              | -5.02943  | -4.62286 | -5.20991 |
| H | 0.40435   | -5.10745 | -0.98354 | H              | 2.04825   | 1.55108  | -6.16079 |
| H | 2.28996   | -3.48342 | -1.44504 | H              | 2.61201   | 2.62831  | -4.85200 |
| H | 4.42243   | -4.50244 | 3.04933  | H              | 2.50310   | 0.76499  | 6.96670  |
| H | 4.02392   | -3.20456 | 4.20688  | H              | 1.17022   | 0.82389  | 8.13274  |
| H | 5.13155   | -2.86688 | 1.62524  | H              | 9.07369   | 4.09885  | -3.61108 |
| H | 1.99476   | -4.01720 | 3.32839  | H              | 8.87239   | 3.02353  | -2.20781 |
| H | 3.29236   | -4.00617 | 0.70798  | H              | 8.49736   | -6.61440 | 0.58894  |
| H | -1.73426  | 0.56519  | 4.80457  | O              | -0.68484  | -2.33455 | -1.26166 |
| H | -1.47037  | 2.31268  | 4.58676  | H              | -1.24504  | -1.72914 | -2.14794 |
| H | 0.29648   | 1.89833  | 3.08562  | H              | -1.11683  | -3.21536 | -1.16812 |
| H | 1.78020   | -0.75009 | 7.55595  | H              | -4.99221  | -1.52466 | -4.14855 |
| H | 0.62969   | -0.45715 | 5.51937  |                |           |          |          |
| H | 1.87993   | 6.01371  | 6.98422  | <b>Pro-Cov</b> |           |          |          |
| H | 2.36649   | 1.86603  | 4.14342  | C              | -5.60349  | -5.19944 | -4.62204 |
| H | 3.66873   | 2.79989  | 4.86249  | C              | -5.09275  | -5.03798 | -3.19860 |
| H | 3.98342   | -0.22505 | 3.24751  | O              | -5.25414  | -3.97620 | -2.59602 |
| H | 5.77375   | -0.26146 | 1.44067  | N              | -4.43190  | -6.09589 | -2.65864 |
| H | 6.42741   | 2.11956  | 0.73647  | C              | -3.99401  | -6.18027 | -1.26982 |
| H | 3.31471   | 4.67252  | 3.34382  | C              | -3.29596  | -4.90690 | -0.77745 |
| H | 1.26821   | 3.69540  | 5.18187  | O              | -2.31531  | -4.47120 | -1.40494 |
| H | 0.49806   | 5.19498  | -1.64081 | C              | -2.97325  | -7.33026 | -1.15913 |
| H | 1.70297   | 6.21344  | -0.84949 | O              | -3.66229  | -8.48242 | -1.65903 |
| H | 1.09815   | 6.77837  | 2.02174  | C              | -2.46041  | -7.53793 | 0.26413  |
| H | -1.21499  | 7.07276  | 2.99182  | N              | -3.74228  | -4.42809 | 0.38531  |
| H | -3.03171  | 6.12817  | 1.47849  | C              | -3.19644  | -3.29054 | 1.11347  |
| H | 1.06255   | 3.29566  | -0.20572 | C              | -3.74165  | -3.41357 | 2.55147  |

|   |           |          |          |   |          |          |          |
|---|-----------|----------|----------|---|----------|----------|----------|
| O | -4.63554  | -4.21826 | 2.83174  | C | 0.13797  | 0.11813  | 0.52244  |
| C | -3.54385  | -1.92587 | 0.45949  | S | 1.01304  | 0.80592  | -0.92753 |
| C | -4.94215  | -1.80185 | -0.16603 | N | -0.16992 | 1.08027  | 3.54100  |
| C | -6.09832  | -1.97322 | 0.82938  | C | -0.97143 | 1.34250  | 4.72335  |
| C | -5.07263  | -0.46613 | -0.91632 | C | -0.02474 | 1.41349  | 5.91569  |
| N | -3.17721  | -2.57224 | 3.44401  | O | 0.22778  | 2.47797  | 6.49572  |
| C | -3.43901  | -2.68212 | 4.87366  | N | 0.55485  | 0.23955  | 6.24377  |
| C | -4.20543  | -1.44178 | 5.34799  | C | 1.60068  | 0.21029  | 7.24375  |
| O | -3.74129  | -0.30766 | 5.19715  | C | 1.09181  | 5.88591  | 6.34080  |
| C | -2.11859  | -2.83103 | 5.65873  | C | 1.64359  | 5.65152  | 4.94265  |
| C | -1.42770  | -4.10060 | 5.15130  | O | 2.05771  | 6.56588  | 4.22821  |
| O | -1.81872  | -5.20763 | 5.50449  | N | 1.70804  | 4.34145  | 4.57191  |
| N | -0.42912  | -3.89209 | 4.25403  | C | 2.57698  | 3.89071  | 3.49803  |
| C | -6.00339  | 3.19795  | 4.15503  | C | 1.83173  | 3.73808  | 2.16314  |
| C | -5.33963  | 3.68969  | 2.87491  | O | 0.74485  | 3.14788  | 2.09153  |
| O | -5.26331  | 4.88809  | 2.60156  | C | 3.20108  | 2.54953  | 3.92547  |
| N | -4.81639  | 2.73388  | 2.04314  | C | 4.13852  | 1.95205  | 2.92575  |
| C | -3.94328  | 3.19199  | 0.96088  | N | 4.93384  | 2.71417  | 2.08484  |
| C | -4.67177  | 3.54727  | -0.33275 | C | 4.42474  | 0.61557  | 2.77063  |
| O | -5.83272  | 3.22924  | -0.58592 | C | 5.69468  | 1.83460  | 1.44670  |
| C | -2.90803  | 2.06150  | 0.75481  | N | 5.42517  | 0.55932  | 1.83399  |
| C | -2.96653  | 1.32340  | 2.09333  | N | 2.43171  | 4.24881  | 1.06478  |
| C | -4.44919  | 1.36854  | 2.45370  | C | 1.80536  | 4.15489  | -0.24268 |
| N | -3.86924  | 4.20716  | -1.22184 | C | 2.73237  | 3.79107  | -1.40353 |
| C | -4.44201  | 4.90260  | -2.37054 | O | 2.21404  | 3.58678  | -2.51049 |
| C | -5.15369  | 4.00066  | -3.38655 | C | 1.02771  | 5.45477  | -0.62952 |
| O | -5.97315  | 4.49043  | -4.15697 | C | -0.00817 | 5.85466  | 0.37735  |
| C | -3.34168  | 5.69249  | -3.08970 | N | -1.36660 | 5.61467  | 0.20741  |
| N | -4.78909  | 2.68547  | -3.42922 | C | 0.20674  | 6.47739  | 1.58510  |
| C | -5.37731  | 1.77614  | -4.39397 | C | -1.95302 | 6.09467  | 1.29299  |
| C | -6.48031  | 0.86786  | -3.80847 | N | -1.03864 | 6.61674  | 2.15401  |
| O | -6.69616  | -0.25252 | -4.27957 | N | 4.08673  | 3.80062  | -1.26237 |
| C | -4.30892  | 0.95613  | -5.14294 | C | 4.89920  | 3.85160  | -2.47759 |
| C | -3.54321  | -0.01103 | -4.29751 | C | 6.36811  | 3.53649  | -2.17382 |
| N | -4.02950  | -1.26632 | -3.97594 | O | 6.80587  | 3.46712  | -1.02899 |
| C | -2.29576  | 0.04543  | -3.71593 | C | 4.76459  | 5.23991  | -3.15721 |
| C | -3.09523  | -1.90366 | -3.23381 | C | 5.30005  | 6.37462  | -2.28314 |
| N | -2.02595  | -1.14018 | -3.06148 | S | 5.01176  | 7.98851  | -3.10439 |
| N | -7.23733  | 1.41465  | -2.82650 | C | 5.69824  | 9.08433  | -1.81352 |
| C | -8.26380  | 0.63059  | -2.13273 | N | 7.13452  | 3.37023  | -3.28856 |
| C | -9.45961  | 0.23171  | -3.01936 | C | 8.58492  | 3.22109  | -3.26429 |
| O | -10.15394 | -0.72757 | -2.69617 | C | 2.82663  | 1.78951  | -5.48512 |
| C | -8.69612  | 1.39403  | -0.85210 | C | 3.06392  | 0.54995  | -4.64246 |
| C | -9.41335  | 2.71365  | -1.17485 | O | 3.25516  | -0.55423 | -5.16326 |
| C | -9.54042  | 0.51037  | 0.07366  | O | 6.35120  | -1.52648 | 0.19831  |
| C | 8.84791   | -2.34716 | 2.46943  | C | 6.51753  | -1.07603 | -0.94290 |
| C | 8.69953   | -3.04867 | 1.13046  | N | 7.51043  | -1.43461 | -1.77417 |
| O | 9.32859   | -2.71170 | 0.12413  | C | 7.51721  | -0.70719 | -3.03657 |
| N | 7.85672   | -4.12401 | 1.14979  | C | 6.08750  | -0.11955 | -3.09833 |
| C | 7.50413   | -4.85032 | -0.05701 | C | 5.66075  | 0.00078  | -1.61962 |
| C | 6.10121   | -4.45900 | -0.52123 | C | 4.16323  | -0.06663 | -1.21619 |
| O | 5.19070   | -4.30616 | 0.31125  | C | 3.15931  | -0.34546 | -2.33994 |
| C | 7.51495   | -6.36747 | 0.18901  | N | 3.08129  | 0.75416  | -3.29916 |
| N | 5.89722   | -4.39289 | -1.84195 | C | 1.73900  | -0.67737 | -1.83760 |
| C | 4.57721   | -4.11959 | -2.38451 | O | 1.75864  | -1.83899 | -1.06455 |
| C | 3.56289   | -5.12857 | -1.78345 | H | -5.50170 | -6.21181 | -5.02149 |
| O | 3.82206   | -6.32067 | -1.70650 | H | -2.13448 | -7.06806 | -1.82083 |
| C | 4.57338   | -4.25778 | -3.91774 | H | -1.82916 | -8.43218 | 0.29985  |
| C | 5.68554   | -3.46952 | -4.60048 | H | -3.28947 | -7.68055 | 0.96371  |
| O | 6.87372   | -3.70295 | -4.34648 | H | -1.85058 | -6.69404 | 0.60142  |
| N | 5.30369   | -2.54568 | -5.51218 | H | -3.03371 | -9.21475 | -1.69394 |
| N | 2.40083   | -4.54631 | -1.39482 | H | -4.85065 | -6.41548 | -0.62354 |
| C | 1.42843   | -5.20188 | -0.54521 | H | -4.42630 | -6.98332 | -3.14296 |
| C | 1.38537   | -4.64337 | 0.88900  | H | -2.80155 | -1.74084 | -0.31803 |
| O | 0.37154   | -4.79848 | 1.57282  | H | -3.40001 | -1.15048 | 1.21468  |
| N | 2.50689   | -4.00446 | 1.31174  | H | -5.03076 | -2.59557 | -0.90958 |
| C | 2.65979   | -3.46574 | 2.65728  | H | -5.86254 | -0.54434 | -1.66174 |
| C | 2.10833   | -2.03902 | 2.84203  | H | -5.32564 | 0.36843  | -0.25491 |
| O | 2.10168   | -1.52917 | 3.96983  | H | -4.15165 | -0.20792 | -1.44849 |
| C | 4.12396   | -3.51333 | 3.13458  | H | -7.05702 | -1.82576 | 0.32098  |
| O | 4.97615   | -2.58483 | 2.48406  | H | -6.11139 | -2.96582 | 1.28451  |
| N | 1.62471   | -1.43128 | 1.74381  | H | -6.03857 | -1.24111 | 1.64397  |
| C | 0.95903   | -0.14705 | 1.79744  | H | -2.10447 | -3.39031 | 1.15882  |
| C | -0.04134  | -0.11980 | 2.96793  | H | -4.52214 | -4.87161 | 0.86180  |
| O | -0.70698  | -1.11712 | 3.29371  | H | -2.34871 | -2.96400 | 6.71905  |

|   |           |          |          |                            |           |          |          |
|---|-----------|----------|----------|----------------------------|-----------|----------|----------|
| H | -1.51371  | -1.93125 | 5.53192  | H                          | 4.78969   | 6.37162  | -1.31441 |
| H | -0.16121  | -4.66234 | 3.65438  | H                          | 5.59256   | 10.11050 | -2.17171 |
| H | -0.29828  | -2.96809 | 3.85765  | H                          | 5.14624   | 8.97854  | -0.87551 |
| H | -4.01406  | -3.59608 | 5.01270  | H                          | 6.75801   | 8.87583  | -1.64273 |
| H | -2.39918  | -1.97512 | 3.17308  | H                          | 4.52606   | 3.09537  | -3.17524 |
| H | -5.25158  | 2.84195  | 4.86822  | H                          | 4.55423   | 3.74535  | -0.36108 |
| H | -1.92826  | 2.48956  | 0.53036  | H                          | 8.89030   | 2.36194  | -3.86797 |
| H | -3.19298  | 1.40227  | -0.06914 | H                          | 6.69114   | 3.48411  | -4.18787 |
| H | -2.41926  | 1.90275  | 2.83385  | H                          | 3.70883   | 1.96251  | -6.10943 |
| H | -2.54955  | 0.31877  | 2.07900  | H                          | 1.69009   | 0.65559  | 1.93746  |
| H | -5.02369  | 0.63428  | 1.88056  | H                          | -0.56466  | 0.91905  | 0.74522  |
| H | -4.62088  | 1.18649  | 3.51262  | H                          | -0.43450  | -0.76718 | 0.24120  |
| H | -3.42850  | 4.08755  | 1.30628  | H                          | 7.73002   | -1.38832 | -3.86453 |
| H | -3.77540  | 6.23802  | -3.92979 | H                          | 3.87925   | 0.86706  | -0.72569 |
| H | -2.86904  | 6.40056  | -2.40313 | H                          | 4.04222   | -0.84250 | -0.45339 |
| H | -2.56915  | 5.01488  | -3.46809 | H                          | 3.46175   | -1.22366 | -2.91548 |
| H | -5.22639  | 5.58979  | -2.03212 | H                          | 2.79061   | 1.66958  | -2.96011 |
| H | -2.96893  | 4.55782  | -0.88332 | N                          | -5.39868  | -1.64709 | 5.95689  |
| H | -3.61001  | 1.66259  | -5.59891 | H                          | -5.85485  | -0.79474 | 6.25433  |
| H | -4.80972  | 0.41391  | -5.94973 | C                          | -6.14449  | -2.90287 | 6.03852  |
| H | -1.57751  | 0.85271  | -3.74381 | H                          | -7.16298  | -2.67432 | 6.35689  |
| H | -3.23693  | -2.88948 | -2.82296 | H                          | -6.18864  | -3.40153 | 5.06593  |
| H | -5.88497  | 2.42208  | -5.11991 | H                          | -5.70484  | -3.59019 | 6.76905  |
| H | -4.15161  | 2.32404  | -2.73252 | H                          | 1.77157   | -1.83819 | 0.82514  |
| H | -7.76234  | 1.64137  | -0.33050 | H                          | 1.09751   | -0.82154 | -2.71576 |
| H | -9.77559  | 1.05540  | 0.99397  | H                          | 0.79016   | -2.19642 | -1.08202 |
| H | -10.47475 | 0.20962  | -0.40593 | N                          | -9.71402  | 1.01245  | -4.10317 |
| H | -9.00356  | -0.40328 | 0.34793  | H                          | -9.06227  | 1.75601  | -4.30561 |
| H | -9.62897  | 3.25868  | -0.25103 | C                          | -10.77699 | 0.71981  | -5.04380 |
| H | -10.36190 | 2.53051  | -1.69095 | H                          | -11.39767 | -0.06320 | -4.60664 |
| H | -8.80540  | 3.37062  | -1.80490 | H                          | -11.39068 | 1.60814  | -5.22588 |
| H | -7.83790  | -0.33374 | -1.83839 | H                          | -10.37898 | 0.36240  | -6.00116 |
| H | -6.86483  | 2.22464  | -2.33856 | H                          | 6.06412   | 0.83704  | -3.62295 |
| H | 9.29380   | -3.02151 | 3.20704  | H                          | 6.06769   | 0.94192  | -1.22985 |
| H | 7.22871   | -6.90648 | -0.71839 | H                          | 5.43532   | -0.80550 | -3.63783 |
| H | 6.79565   | -6.62437 | 0.97253  | H                          | 8.27899   | 0.08488  | -3.02108 |
| H | 8.24599   | -4.58127 | -0.81222 | H                          | 8.28957   | -1.97972 | -1.40312 |
| H | 7.17943   | -4.16540 | 1.90113  | H                          | 9.48443   | -1.47245 | 2.34176  |
| H | 3.58603   | -3.97059 | -4.28910 | H                          | 7.86219   | -2.03891 | 2.83530  |
| H | 4.73338   | -5.31389 | -4.15983 | H                          | 0.56956   | 6.84397  | 6.36723  |
| H | 6.04824   | -1.99731 | -5.92029 | H                          | 0.43290   | 5.07870  | 6.67131  |
| H | 4.38560   | -2.10781 | -5.49371 | H                          | -6.54125  | 4.03671  | 4.59631  |
| H | 4.28493   | -3.10023 | -2.10178 | H                          | -6.69614  | 2.37396  | 3.96181  |
| H | 6.66718   | -4.40263 | -2.50743 | H                          | -6.65414  | -4.90166 | -4.64089 |
| H | 1.68361   | -6.26473 | -0.49749 | H                          | -5.05228  | -4.50720 | -5.26532 |
| H | 0.41534   | -5.10896 | -0.94701 | H                          | 1.99014   | 1.59264  | -6.16048 |
| H | 2.32987   | -3.53251 | -1.45674 | H                          | 2.61261   | 2.67938  | -4.88870 |
| H | 4.49073   | -4.54296 | 3.02399  | H                          | 2.54735   | 0.60501  | 6.85379  |
| H | 4.12086   | -3.24778 | 4.19407  | H                          | 1.30088   | 0.82080  | 8.09665  |
| H | 5.17551   | -2.91319 | 1.58912  | H                          | 9.08252   | 4.12070  | -3.64148 |
| H | 2.06946   | -4.07941 | 3.34566  | H                          | 8.88486   | 3.05660  | -2.22889 |
| H | 3.33140   | -4.02856 | 0.71588  | H                          | 8.51155   | -6.68753 | 0.50208  |
| H | -1.73633  | 0.57133  | 4.84383  | O                          | -0.64802  | -2.42384 | -1.16306 |
| H | -1.45044  | 2.31865  | 4.63305  | H                          | -1.04910  | -1.87175 | -1.90066 |
| H | 0.30013   | 1.88798  | 3.11256  | H                          | -1.18206  | -3.25148 | -1.14053 |
| H | 1.75846   | -0.81985 | 7.56763  | H                          | -4.99186  | -1.55777 | -4.11521 |
| H | 0.52330   | -0.52350 | 5.57606  |                            |           |          |          |
| H | 1.93739   | 5.94457  | 7.03431  | <b>Reac-H<sub>2</sub>O</b> |           |          |          |
| H | 2.40979   | 1.82531  | 4.15068  | C                          | -5.45954  | -5.08680 | -4.69728 |
| H | 3.72029   | 2.74411  | 4.87310  | C                          | -4.59273  | -4.85052 | -3.46368 |
| H | 4.03205   | -0.26682 | 3.24704  | O                          | -4.51358  | -3.72962 | -2.95554 |
| H | 5.79446   | -0.29776 | 1.41332  | N                          | -3.96744  | -5.94744 | -2.96169 |
| H | 6.44393   | 2.08634  | 0.71217  | C                          | -3.38159  | -6.12280 | -1.63224 |
| H | 3.36870   | 4.63427  | 3.37486  | C                          | -2.78352  | -4.85363 | -0.99783 |
| H | 1.31626   | 3.64731  | 5.20431  | O                          | -1.81044  | -4.27073 | -1.48649 |
| H | 0.55459   | 5.27460  | -1.59682 | C                          | -2.26213  | -7.17644 | -1.71685 |
| H | 1.75398   | 6.26654  | -0.76150 | O                          | -2.85238  | -8.29855 | -2.38808 |
| H | 1.10213   | 6.77639  | 2.10863  | C                          | -1.73131  | -7.57389 | -0.34073 |
| H | -1.22970  | 7.02665  | 3.05557  | N                          | -3.33673  | -4.54146 | 0.18642  |
| H | -3.01464  | 6.09005  | 1.50489  | C                          | -2.92613  | -3.41806 | 1.00605  |
| H | 1.07828   | 3.34731  | -0.17472 | C                          | -3.53548  | -3.64702 | 2.40385  |
| H | 3.32556   | 4.70322  | 1.18744  | O                          | -4.34632  | -4.55134 | 2.61340  |
| H | 3.70539   | 5.39406  | -3.37839 | C                          | -3.33715  | -2.06580 | 0.37219  |
| H | 5.28889   | 5.23043  | -4.11949 | C                          | -4.75458  | -1.99326 | -0.21959 |
| H | 6.37275   | 6.25146  | -2.09560 | C                          | -5.87790  | -2.23679 | 0.79883  |

|   |           |          |          |   |          |          |          |
|---|-----------|----------|----------|---|----------|----------|----------|
| C | -4.96821  | -0.65092 | -0.93625 | C | 0.03305  | 1.36248  | 5.85679  |
| N | -3.11904  | -2.76424 | 3.33928  | O | 0.17151  | 2.41641  | 6.49316  |
| C | -3.46331  | -2.89386 | 4.74350  | N | 0.70489  | 0.23506  | 6.16253  |
| C | -4.17970  | -1.62141 | 5.20899  | C | 1.65682  | 0.24840  | 7.25492  |
| O | -3.73548  | -0.50097 | 4.94470  | C | 0.97920  | 5.92660  | 6.48949  |
| C | -2.20259  | -3.09587 | 5.61994  | C | 1.55203  | 5.69013  | 5.09558  |
| C | -1.46917  | -4.34988 | 5.13855  | O | 1.94990  | 6.60978  | 4.37831  |
| O | -1.84278  | -5.46674 | 5.47598  | N | 1.65485  | 4.37983  | 4.73577  |
| N | -0.43510  | -4.10892 | 4.28837  | C | 2.51073  | 3.93988  | 3.64741  |
| C | -6.04858  | 3.08656  | 4.27839  | C | 1.75149  | 3.76734  | 2.32332  |
| C | -5.34814  | 3.56849  | 3.01063  | O | 0.67054  | 3.16750  | 2.27382  |
| O | -5.15869  | 4.76680  | 2.79507  | C | 3.15038  | 2.59581  | 4.04924  |
| N | -4.92876  | 2.60222  | 2.13422  | C | 4.04976  | 2.00717  | 3.00890  |
| C | -3.97653  | 2.98947  | 1.08719  | N | 4.86554  | 2.78139  | 2.19993  |
| C | -4.64391  | 3.30442  | -0.25271 | C | 4.27056  | 0.67019  | 2.76865  |
| O | -5.79605  | 2.98008  | -0.53645 | C | 5.57516  | 1.91056  | 1.49674  |
| C | -2.95814  | 1.81812  | 0.99531  | N | 5.25335  | 0.62615  | 1.81028  |
| C | -3.20610  | 1.06653  | 2.30649  | N | 2.34109  | 4.25660  | 1.20664  |
| C | -4.71236  | 1.19479  | 2.49840  | C | 1.69811  | 4.12414  | -0.08976 |
| N | -3.81443  | 3.94673  | -1.13073 | C | 2.59845  | 3.74423  | -1.26697 |
| C | -4.36605  | 4.64771  | -2.28966 | O | 2.04198  | 3.42203  | -2.32810 |
| C | -5.12118  | 3.76174  | -3.28990 | C | 0.90566  | 5.41252  | -0.49262 |
| O | -5.98895  | 4.25529  | -4.00343 | C | -0.13378 | 5.80056  | 0.51375  |
| C | -3.23442  | 5.37714  | -3.02447 | N | -1.48102 | 5.50256  | 0.35632  |
| N | -4.72579  | 2.46055  | -3.39299 | C | 0.06478  | 6.44045  | 1.71544  |
| C | -5.32280  | 1.55555  | -4.35864 | C | -2.08017 | 5.96293  | 1.44335  |
| C | -6.38488  | 0.60809  | -3.75682 | N | -1.18163 | 6.53015  | 2.29266  |
| O | -6.51832  | -0.54401 | -4.16759 | N | 3.95106  | 3.88519  | -1.20130 |
| C | -4.25820  | 0.77624  | -5.15674 | C | 4.72094  | 3.89668  | -2.44819 |
| C | -3.24440  | 0.06538  | -4.31915 | C | 6.22718  | 3.76330  | -2.14648 |
| N | -3.36948  | -1.22607 | -3.84320 | O | 6.65273  | 3.64035  | -1.00102 |
| C | -2.02494  | 0.49576  | -3.84715 | C | 4.39981  | 5.17624  | -3.26108 |
| C | -2.25655  | -1.52401 | -3.12286 | C | 4.83179  | 6.45440  | -2.54182 |
| N | -1.41428  | -0.49681 | -3.10589 | S | 4.33793  | 7.92284  | -3.52236 |
| N | -7.20332  | 1.17441  | -2.82903 | C | 4.91878  | 9.22808  | -2.38349 |
| C | -8.22963  | 0.38752  | -2.14159 | N | 7.02747  | 3.78208  | -3.24985 |
| C | -9.49479  | 0.12640  | -2.98678 | C | 8.48821  | 3.70668  | -3.21579 |
| O | -10.24059 | -0.80164 | -2.68622 | C | 1.61559  | 1.59970  | -5.39090 |
| C | -8.55982  | 1.06153  | -0.78164 | C | 2.32452  | 0.46616  | -4.68024 |
| C | -9.23964  | 2.42835  | -0.95578 | O | 2.51299  | -0.62679 | -5.22737 |
| C | -9.38657  | 0.14033  | 0.12309  | O | 6.16647  | -1.38138 | 0.03390  |
| C | 8.94596   | -1.98506 | 2.38285  | C | 6.38571  | -0.84075 | -1.05805 |
| C | 8.74558   | -2.66135 | 1.03482  | N | 7.42650  | -1.11245 | -1.86199 |
| O | 9.31941   | -2.27942 | 0.01054  | C | 7.47865  | -0.29506 | -3.06673 |
| N | 7.93562   | -3.75889 | 1.06225  | C | 6.05241  | 0.30301  | -3.14389 |
| C | 7.59629   | -4.50770 | -0.13634 | C | 5.54718  | 0.28096  | -1.68572 |
| C | 6.13658   | -4.27146 | -0.52084 | C | 4.03644  | 0.15216  | -1.37316 |
| O | 5.25867   | -4.25156 | 0.35994  | C | 3.14439  | -0.34108 | -2.51622 |
| C | 7.78660   | -6.01737 | 0.08492  | N | 2.71571  | 0.72692  | -3.40335 |
| N | 5.85683   | -4.19930 | -1.82659 | C | 1.95553  | -1.17266 | -2.05531 |
| C | 4.48691   | -4.04455 | -2.28693 | O | 2.06101  | -1.98646 | -1.14221 |
| C | 3.61193   | -5.18324 | -1.69078 | H | -5.25845 | -6.03409 | -5.20446 |
| O | 4.02342   | -6.33024 | -1.60268 | H | -1.46026 | -6.73864 | -2.32843 |
| C | 4.41373   | -4.09699 | -3.82443 | H | -0.95895 | -8.34308 | -0.44892 |
| C | 5.39637   | -3.15762 | -4.51719 | H | -2.53894 | -7.98979 | 0.26928  |
| O | 6.61397   | -3.25456 | -4.31986 | H | -1.28526 | -6.73251 | 0.19751  |
| N | 4.87135   | -2.25363 | -5.37456 | H | -2.15619 | -8.94376 | -2.56375 |
| N | 2.37756   | -4.76072 | -1.31041 | H | -4.16086 | -6.52506 | -0.96932 |
| C | 1.50955   | -5.49780 | -0.41880 | H | -4.08669 | -6.83046 | -3.44065 |
| C | 1.49119   | -4.93654 | 1.01545  | H | -2.62489 | -1.86368 | -0.43131 |
| O | 0.52351   | -5.16656 | 1.74154  | H | -3.20471 | -1.28180 | 1.11882  |
| N | 2.56622   | -4.18866 | 1.38580  | H | -4.81794 | -2.77168 | -0.98248 |
| C | 2.70784   | -3.59422 | 2.70966  | H | -5.77402 | -0.75317 | -1.66117 |
| C | 2.06619   | -2.19985 | 2.84705  | H | -5.23873 | 0.15662  | -0.25032 |
| O | 2.07647   | -1.62117 | 3.93911  | H | -4.07653 | -0.33637 | -1.48727 |
| C | 4.18243   | -3.50404 | 3.15220  | H | -6.85287 | -2.06828 | 0.32932  |
| O | 4.93175   | -2.51876 | 2.45879  | H | -5.86820 | -3.25507 | 1.19233  |
| N | 1.49668   | -1.69855 | 1.73368  | H | -5.79864 | -1.55429 | 1.65325  |
| C | 0.77374   | -0.43931 | 1.69389  | H | -1.83357 | -3.44040 | 1.11378  |
| C | -0.11117  | -0.31193 | 2.94408  | H | -4.08824 | -5.09188 | 0.58774  |
| O | -0.74911  | -1.28276 | 3.38089  | H | -2.51141 | -3.25662 | 6.65647  |
| C | -0.14402  | -0.40813 | 0.44302  | H | -1.58249 | -2.19787 | 5.56302  |
| S | 0.37262   | 0.86779  | -0.77296 | H | -0.11516 | -4.86601 | 3.69610  |
| N | -0.17527  | 0.91516  | 3.46143  | H | -0.31845 | -3.17688 | 3.90822  |
| C | -0.91263  | 1.25884  | 4.66469  | H | -4.09228 | -3.77986 | 4.82590  |



|   |           |          |          |                            |           |          |          |
|---|-----------|----------|----------|----------------------------|-----------|----------|----------|
| H | -2.36033  | -2.12088 | 3.12930  | H                          | 4.41906   | 3.02991  | -3.04860 |
| H | -5.33216  | 2.60801  | 4.95526  | H                          | 4.46123   | 3.90042  | -0.32234 |
| H | -1.93801  | 2.19566  | 0.89147  | H                          | 8.84247   | 2.85648  | -3.80616 |
| H | -3.17116  | 1.18071  | 0.13277  | H                          | 6.59041   | 3.91460  | -4.14934 |
| H | -2.73108  | 1.60325  | 3.12403  | H                          | 2.01493   | 1.69436  | -6.40296 |
| H | -2.84658  | 0.04177  | 2.34174  | H                          | 1.48395   | 0.39702  | 1.68007  |
| H | -5.26943  | 0.54458  | 1.81744  | H                          | -1.17167  | -0.19667 | 0.73085  |
| H | -5.01562  | 0.97109  | 3.51682  | H                          | -0.13862  | -1.38341 | -0.04903 |
| H | -3.46185  | 3.88686  | 1.42406  | H                          | 7.71517   | -0.91675 | -3.93396 |
| H | -3.64471  | 5.93175  | -3.87086 | H                          | 3.64220   | 1.10829  | -1.02073 |
| H | -2.72801  | 6.07247  | -2.34882 | H                          | 3.92908   | -0.54309 | -0.53568 |
| H | -2.49575  | 4.65903  | -3.39600 | H                          | 3.69648   | -1.06233 | -3.13317 |
| H | -5.11833  | 5.37417  | -1.96060 | H                          | 2.42029   | 1.60483  | -2.97650 |
| H | -2.94150  | 4.33106  | -0.75627 | N                          | -5.29370  | -1.78003 | 5.96164  |
| H | -3.73119  | 1.49456  | -5.79130 | H                          | -5.70864  | -0.91062 | 6.26896  |
| H | -4.77845  | 0.06826  | -5.80581 | C                          | -5.97292  | -3.03239 | 6.28222  |
| H | -1.55772  | 1.45898  | -4.00356 | H                          | -6.85548  | -2.79880 | 6.87969  |
| H | -2.11413  | -2.48272 | -2.64144 | H                          | -6.29767  | -3.55907 | 5.37925  |
| H | -5.87128  | 2.20038  | -5.05502 | H                          | -5.33408  | -3.70087 | 6.86804  |
| H | -4.05043  | 2.09778  | -2.73313 | H                          | 1.64748   | -2.18122 | 0.85813  |
| H | -7.58942  | 1.23561  | -0.30013 | H                          | 1.06003   | -1.13972 | -2.69822 |
| H | -9.54070  | 0.61733  | 1.09696  | N                          | -9.74418  | 0.98956  | -4.00945 |
| H | -10.36054 | -0.08175 | -0.31877 | H                          | -9.05093  | 1.70066  | -4.19322 |
| H | -8.87702  | -0.81408 | 0.28968  | C                          | -10.88986 | 0.85605  | -4.88627 |
| H | -9.37971  | 2.90256  | 0.02019  | H                          | -11.48144 | 1.77791  | -4.90257 |
| H | -10.22284 | 2.32289  | -1.42702 | H                          | -10.58384 | 0.61595  | -5.91131 |
| H | -8.64202  | 3.11545  | -1.56290 | H                          | -11.50533 | 0.04224  | -4.50078 |
| H | -7.83528  | -0.61584 | -1.95362 | H                          | 6.05874   | 1.30295  | -3.57930 |
| H | -6.86566  | 2.00803  | -2.35810 | H                          | 5.90797   | 1.18707  | -1.18603 |
| H | 9.54949   | -1.08943 | 2.24135  | H                          | 5.43192   | -0.33105 | -3.77760 |
| H | 7.51097   | -6.57523 | -0.81440 | H                          | 8.24126   | 0.48960  | -2.96774 |
| H | 7.14382   | -6.35876 | 0.90171  | H                          | 8.21252   | -1.64558 | -1.48600 |
| H | 8.26321   | -4.15367 | -0.92526 | H                          | 7.97506   | -1.71361 | 2.81250  |
| H | 7.29549   | -3.85297 | 1.84078  | H                          | 9.45077   | -2.66302 | 3.07775  |
| H | 3.38249   | -3.90076 | -4.13071 | H                          | 0.42286   | 6.86555  | 6.49487  |
| H | 4.67043   | -5.11367 | -4.14182 | H                          | 0.34431   | 5.10264  | 6.82611  |
| H | 5.52924   | -1.63496 | -5.82779 | H                          | -6.47618  | 3.95847  | 4.77293  |
| H | 3.89589   | -1.95805 | -5.36834 | H                          | -6.83898  | 2.36390  | 4.05731  |
| H | 4.10577   | -3.08396 | -1.92245 | H                          | -6.50595  | -5.07043 | -4.37758 |
| H | 6.58576   | -4.08424 | -2.52736 | H                          | -5.31591  | -4.25870 | -5.39382 |
| H | 1.83838   | -6.54028 | -0.39027 | H                          | 0.55872   | 1.32628  | -5.47701 |
| H | 0.47604   | -5.45552 | -0.77353 | H                          | 1.69284   | 2.55037  | -4.85816 |
| H | 2.16576   | -3.77195 | -1.38442 | H                          | 1.18970   | 0.67259  | 8.14605  |
| H | 4.63541   | -4.49948 | 3.05249  | H                          | 1.97573   | -0.77466 | 7.45921  |
| H | 4.18207   | -3.21503 | 4.20542  | H                          | 8.93414   | 4.62716  | -3.60438 |
| H | 5.13372   | -2.85878 | 1.56813  | H                          | 8.78950   | 3.57264  | -2.17647 |
| H | 2.17448   | -4.22226 | 3.43144  | H                          | 8.82811   | -6.22905 | 0.33828  |
| H | 3.37316   | -4.15060 | 0.76661  | H                          | -4.19090  | -1.82569 | -3.88711 |
| H | -1.69451  | 0.51619  | 4.84618  | H                          | -0.41270  | 0.36430  | -1.78923 |
| H | -1.36223  | 2.24427  | 4.53727  |                            |           |          |          |
| H | 0.29983   | 1.70075  | 3.00229  |                            |           |          |          |
| H | 2.53937   | 0.85400  | 7.01513  | <b>TS-1-H<sub>2</sub>O</b> |           |          |          |
| H | 0.73582   | -0.53211 | 5.49885  | C                          | -5.34356  | -5.14368 | -4.77417 |
| H | 1.81593   | 6.02628  | 7.18875  | C                          | -4.52700  | -4.86220 | -3.51339 |
| H | 2.36372   | 1.87151  | 4.28866  | O                          | -4.49630  | -3.73105 | -3.01906 |
| H | 3.70124   | 2.77979  | 4.98066  | N                          | -3.89151  | -5.93426 | -2.97548 |
| H | 3.85414   | -0.22208 | 3.20622  | C                          | -3.32050  | -6.08532 | -1.63585 |
| H | 5.59948   | -0.21999 | 1.35241  | C                          | -2.77565  | -4.79925 | -0.99168 |
| H | 6.32472   | 2.17421  | 0.76617  | O                          | -1.83989  | -4.16339 | -1.48709 |
| H | 3.29416   | 4.69025  | 3.51404  | C                          | -2.16282  | -7.10007 | -1.70532 |
| H | 1.23871   | 3.67687  | 5.34262  | O                          | -2.71209  | -8.24421 | -2.37381 |
| H | 0.43080   | 5.21718  | -1.45646 | C                          | -1.62400  | -7.47110 | -0.32527 |
| H | 1.62269   | 6.23128  | -0.63243 | N                          | -3.32154  | -4.53063 | 0.20689  |
| H | 0.95077   | 6.77883  | 2.23133  | C                          | -2.93610  | -3.40824 | 1.04037  |
| H | -1.38419  | 6.93298  | 3.19485  | C                          | -3.48695  | -3.68851 | 2.45301  |
| H | -3.13787  | 5.90645  | 1.66916  | O                          | -4.30468  | -4.58752 | 2.66411  |
| H | 0.97186   | 3.31770  | 0.00917  | C                          | -3.43201  | -2.05591 | 0.46358  |
| H | 3.22441   | 4.73493  | 1.31295  | C                          | -4.83344  | -2.05862 | -0.16827 |
| H | 3.32263   | 5.18628  | -3.44330 | C                          | -5.96254  | -2.39378 | 0.81700  |
| H | 4.87617   | 5.12073  | -4.24687 | C                          | -5.11706  | -0.71622 | -0.85682 |
| H | 5.91768   | 6.46925  | -2.39242 | N                          | -3.00986  | -2.84828 | 3.39511  |
| H | 4.35576   | 6.50587  | -1.55710 | C                          | -3.29275  | -2.99930 | 4.81293  |
| H | 4.68507   | 10.18837 | -2.84787 | C                          | -4.05372  | -1.75863 | 5.29489  |
| H | 4.40308   | 9.16596  | -1.42126 | O                          | -3.59355  | -0.62469 | 5.13255  |
| H | 5.99924   | 9.16344  | -2.22783 | C                          | -1.98727  | -3.14725 | 5.62631  |
|   |           |          |          | C                          | -1.24811  | -4.38876 | 5.11982  |

|   |           |          |          |   |          |          |          |
|---|-----------|----------|----------|---|----------|----------|----------|
| O | -1.60336  | -5.51186 | 5.45882  | N | 1.56382  | 4.36322  | 4.75740  |
| N | -0.23762  | -4.13281 | 4.24811  | C | 2.41192  | 3.95969  | 3.64941  |
| C | -6.09735  | 2.90878  | 4.29791  | C | 1.63538  | 3.77213  | 2.33617  |
| C | -5.44668  | 3.39362  | 3.00466  | O | 0.54024  | 3.19730  | 2.31037  |
| O | -5.37780  | 4.59146  | 2.72548  | C | 3.10568  | 2.63740  | 4.03669  |
| N | -4.92690  | 2.43536  | 2.17386  | C | 4.01185  | 2.07482  | 2.98812  |
| C | -4.04390  | 2.88399  | 1.08999  | N | 4.80410  | 2.86813  | 2.17379  |
| C | -4.78118  | 3.22365  | -0.20455 | C | 4.27123  | 0.74382  | 2.75365  |
| O | -5.92794  | 2.85818  | -0.46086 | C | 5.53861  | 2.01387  | 1.47460  |
| C | -2.99777  | 1.75365  | 0.91254  | N | 5.25367  | 0.72303  | 1.79445  |
| C | -3.07047  | 1.04937  | 2.26821  | N | 2.23102  | 4.22367  | 1.20672  |
| C | -4.55888  | 1.07482  | 2.59635  | C | 1.59680  | 4.05238  | -0.09119 |
| N | -4.01543  | 3.93551  | -1.08663 | C | 2.52302  | 3.73174  | -1.26725 |
| C | -4.63923  | 4.64270  | -2.20379 | O | 1.98794  | 3.42695  | -2.34397 |
| C | -5.32090  | 3.74398  | -3.24552 | C | 0.75018  | 5.30514  | -0.50700 |
| O | -6.17606  | 4.21309  | -3.98910 | C | -0.27754 | 5.70595  | 0.50632  |
| C | -3.58900  | 5.51137  | -2.90660 | N | -1.62772 | 5.40892  | 0.37119  |
| N | -4.88017  | 2.45564  | -3.33543 | C | -0.06445 | 6.36981  | 1.69248  |
| C | -5.43951  | 1.51870  | -4.29093 | C | -2.21214 | 5.88913  | 1.45804  |
| C | -6.47596  | 0.54629  | -3.68517 | N | -1.30242 | 6.47106  | 2.28463  |
| O | -6.59567  | -0.60001 | -4.11569 | N | 3.87127  | 3.90898  | -1.18693 |
| C | -4.34572  | 0.75401  | -5.06449 | C | 4.64430  | 3.98811  | -2.42962 |
| C | -3.32616  | 0.09981  | -4.18914 | C | 6.15341  | 3.89345  | -2.13007 |
| N | -3.38175  | -1.20621 | -3.73395 | O | 6.58489  | 3.78611  | -0.98542 |
| C | -2.17835  | 0.61977  | -3.64061 | C | 4.29111  | 5.28934  | -3.19448 |
| C | -2.30350  | -1.44163 | -2.95196 | C | 4.68215  | 6.54929  | -2.42154 |
| N | -1.55269  | -0.34504 | -2.87981 | S | 4.13694  | 8.04124  | -3.33736 |
| N | -7.28937  | 1.08255  | -2.73728 | C | 4.67588  | 9.31465  | -2.14311 |
| C | -8.31620  | 0.27249  | -2.07883 | N | 6.95066  | 3.93816  | -3.23520 |
| C | -9.54130  | -0.01798 | -2.96936 | C | 8.41354  | 3.93000  | -3.20254 |
| O | -10.28257 | -0.95692 | -2.69271 | C | 1.65175  | 1.65542  | -5.38392 |
| C | -8.70703  | 0.94187  | -0.73362 | C | 2.34628  | 0.50472  | -4.68306 |
| C | -9.43442  | 2.27953  | -0.93791 | O | 2.53334  | -0.57938 | -5.25013 |
| C | -9.52003  | -0.00760 | 0.15414  | O | 6.25177  | -1.24656 | 0.02161  |
| C | 9.00052   | -1.81612 | 2.32807  | C | 6.43178  | -0.70016 | -1.07464 |
| C | 8.84901   | -2.48352 | 0.97049  | N | 7.47298  | -0.92937 | -1.89141 |
| O | 9.41055   | -2.06080 | -0.04433 | C | 7.47714  | -0.11093 | -3.09628 |
| N | 8.09248   | -3.61908 | 0.97852  | C | 6.02628  | 0.42673  | -3.15697 |
| C | 7.77004   | -4.34843 | -0.23606 | C | 5.53503  | 0.38004  | -1.69394 |
| C | 6.29955   | -4.14895 | -0.59999 | C | 4.03396  | 0.17508  | -1.36969 |
| O | 5.43337   | -4.16001 | 0.29266  | C | 3.15347  | -0.32386 | -2.51540 |
| C | 8.01218   | -5.85600 | -0.05581 | N | 2.72354  | 0.74582  | -3.40069 |
| N | 6.00335   | -4.07133 | -1.90132 | C | 1.97325  | -1.18133 | -2.06342 |
| C | 4.62479   | -3.95993 | -2.34826 | O | 2.11353  | -2.03756 | -1.17929 |
| C | 3.79712   | -5.13473 | -1.75469 | H | -5.10656 | -6.09871 | -5.24987 |
| O | 4.25261   | -6.26645 | -1.67768 | H | -1.37333 | -6.63849 | -2.31590 |
| C | 4.54116   | -3.99975 | -3.88556 | H | -0.83887 | -8.22812 | -0.42672 |
| C | 5.49045   | -3.02602 | -4.57754 | H | -2.42209 | -7.89384 | 0.29259  |
| O | 6.71217   | -3.08982 | -4.39142 | H | -1.18805 | -6.61707 | 0.20131  |
| N | 4.93264   | -2.13119 | -5.42373 | H | -1.99619 | -8.87166 | -2.53414 |
| N | 2.55306   | -4.75886 | -1.35975 | H | -4.09486 | -6.51656 | -0.98596 |
| C | 1.73199   | -5.52998 | -0.45362 | H | -3.96868 | -6.82424 | -3.45048 |
| C | 1.69085   | -4.94668 | 0.97191  | H | -2.71369 | -1.75072 | -0.30073 |
| O | 0.72098   | -5.18094 | 1.69419  | H | -3.38407 | -1.30985 | 1.25732  |
| N | 2.75533   | -4.18502 | 1.34019  | H | -4.83127 | -2.82031 | -0.95177 |
| C | 2.87940   | -3.57258 | 2.65671  | H | -5.91869 | -0.84792 | -1.58063 |
| C | 2.19583   | -2.19806 | 2.78401  | H | -5.42250 | 0.06581  | -0.15524 |
| O | 2.15459   | -1.63640 | 3.88586  | H | -4.24592 | -0.34722 | -1.40696 |
| C | 4.35050   | -3.43538 | 3.09819  | H | -6.93411 | -2.31493 | 0.31735  |
| O | 5.06797   | -2.42774 | 2.40369  | H | -5.87378 | -3.40251 | 1.22493  |
| N | 1.65238   | -1.69704 | 1.65984  | H | -5.96956 | -1.69678 | 1.66424  |
| C | 0.86815   | -0.47446 | 1.61309  | H | -1.84119 | -3.38085 | 1.10872  |
| C | -0.02004  | -0.38126 | 2.86020  | H | -4.04729 | -5.11465 | 0.60830  |
| O | -0.66292  | -1.36400 | 3.26396  | H | -2.24094 | -3.30515 | 6.67808  |
| C | -0.05834  | -0.49735 | 0.36706  | H | -1.39820 | -2.23200 | 5.53179  |
| S | 0.46271   | 0.65736  | -0.95839 | H | 0.08476  | -4.88500 | 3.65082  |
| N | -0.09265  | 0.83258  | 3.40617  | H | -0.14228 | -3.19949 | 3.86519  |
| C | -0.85719  | 1.16401  | 4.59502  | H | -3.87208 | -3.91521 | 4.92165  |
| C | 0.05414   | 1.27779  | 5.80898  | H | -2.26349 | -2.19662 | 3.16297  |
| O | 0.12244   | 2.31677  | 6.48052  | H | -5.33344 | 2.57594  | 5.00932  |
| N | 0.77023   | 0.17511  | 6.10126  | H | -2.01072 | 2.16559  | 0.68793  |
| C | 1.67098   | 0.20233  | 7.23325  | H | -3.28004 | 1.07662  | 0.10217  |
| C | 0.87040   | 5.87324  | 6.53556  | H | -2.56175 | 1.66743  | 3.00347  |
| C | 1.41370   | 5.66667  | 5.12452  | H | -2.63035 | 0.05628  | 2.30877  |
| O | 1.75364   | 6.60509  | 4.40167  | H | -5.11571 | 0.33275  | 2.01412  |

|   |           |          |          |                |           |          |          |
|---|-----------|----------|----------|----------------|-----------|----------|----------|
| H | -4.74735  | 0.89560  | 3.65200  | H              | -0.09797  | -1.51432 | -0.03468 |
| H | -3.53383  | 3.78459  | 1.42779  | H              | 7.72928   | -0.72198 | -3.96679 |
| H | -4.05933  | 6.06412  | -3.72201 | H              | 3.60196   | 1.10178  | -0.98427 |
| H | -3.14230  | 6.21694  | -2.20055 | H              | 3.96341   | -0.54879 | -0.55268 |
| H | -2.78903  | 4.88650  | -3.31790 | H              | 3.71762   | -1.03437 | -3.13344 |
| H | -5.45115  | 5.27777  | -1.83028 | H              | 2.42553   | 1.62128  | -2.97133 |
| H | -3.13461  | 4.32809  | -0.73810 | N              | -5.23586  | -1.95992 | 5.92287  |
| H | -3.83217  | 1.46987  | -5.71222 | H              | -5.68565  | -1.10805 | 6.23089  |
| H | -4.83696  | 0.01154  | -5.69639 | C              | -5.96280  | -3.22115 | 6.05494  |
| H | -1.76828  | 1.61413  | -3.74341 | H              | -6.95598  | -3.00245 | 6.45051  |
| H | -2.11349  | -2.39223 | -2.46797 | H              | -6.07843  | -3.71854 | 5.08734  |
| H | -5.99894  | 2.13411  | -5.00493 | H              | -5.46417  | -3.90786 | 6.74685  |
| H | -4.23677  | 2.11610  | -2.63341 | H              | 1.84530   | -2.15308 | 0.77588  |
| H | -7.75744  | 1.15591  | -0.22725 | H              | 1.15257   | -1.25005 | -2.79493 |
| H | -9.73185  | 0.47188  | 1.11579  | N              | -9.75712  | 0.83048  | -4.01050 |
| H | -10.46537 | -0.28219 | -0.31927 | H              | -9.08334  | 1.56832  | -4.15564 |
| H | -8.96903  | -0.93311 | 0.35102  | C              | -10.86969 | 0.68066  | -4.92658 |
| H | -9.61360  | 2.75974  | 0.02865  | H              | -11.49927 | 1.57741  | -4.93373 |
| H | -10.40273 | 2.13130  | -1.42810 | H              | -10.52101 | 0.48717  | -5.94754 |
| H | -8.85012  | 2.98021  | -1.54278 | H              | -11.46295 | -0.16909 | -4.58654 |
| H | -7.90713  | -0.72150 | -1.87412 | H              | 5.98740   | 1.42747  | -3.58923 |
| H | -6.95899  | 1.90662  | -2.24386 | H              | 5.85608   | 1.30247  | -1.19712 |
| H | 9.58330   | -0.90352 | 2.20995  | H              | 5.42656   | -0.22993 | -3.78706 |
| H | 7.74694   | -6.39939 | -0.96697 | H              | 8.20741   | 0.70508  | -3.00596 |
| H | 7.38853   | -6.23975 | 0.75704  | H              | 8.28276   | -1.43317 | -1.52582 |
| H | 8.41732   | -3.95180 | -1.02113 | H              | 8.01123   | -1.57455 | 2.73308  |
| H | 7.45411   | -3.75047 | 1.75314  | H              | 9.50414   | -2.48685 | 3.03082  |
| H | 3.50230   | -3.83009 | -4.18148 | H              | 0.28794   | 6.79564  | 6.56550  |
| H | 4.82498   | -5.00535 | -4.21516 | H              | 0.26724   | 5.02815  | 6.87853  |
| H | 5.56972   | -1.48730 | -5.87169 | H              | -6.64182  | 3.74763  | 4.73086  |
| H | 3.95047   | -1.85781 | -5.39942 | H              | -6.78165  | 2.07400  | 4.12265  |
| H | 4.21098   | -3.01809 | -1.97132 | H              | -6.40121  | -5.13815 | -4.49378 |
| H | 6.72182   | -3.93232 | -2.60854 | H              | -5.18797  | -4.33014 | -5.48529 |
| H | 2.11941   | -6.55202 | -0.41208 | H              | 0.59244   | 1.39644  | -5.48462 |
| H | 0.69534   | -5.55483 | -0.79957 | H              | 1.73226   | 2.59756  | -4.83704 |
| H | 2.30578   | -3.77372 | -1.42286 | H              | 1.14060   | 0.55406  | 8.12075  |
| H | 4.83485   | -4.41625 | 3.00038  | H              | 2.05038   | -0.80542 | 7.40885  |
| H | 4.34166   | -3.14482 | 4.15104  | H              | 8.81660   | 4.87254  | -3.58530 |
| H | 5.27661   | -2.75724 | 1.51087  | H              | 8.72121   | 3.80302  | -2.16421 |
| H | 2.36514   | -4.20815 | 3.38556  | H              | 9.06235   | -6.03923 | 0.18371  |
| H | 3.55873   | -4.12912 | 0.71758  | H              | -4.14941  | -1.87262 | -3.82978 |
| H | -1.63455  | 0.41364  | 4.76544  | H              | -0.56275  | 0.10691  | -1.97209 |
| H | -1.31198  | 2.14575  | 4.46155  |                |           |          |          |
| H | 0.34941   | 1.63452  | 2.94737  |                |           |          |          |
| H | 2.51939   | 0.87576  | 7.05984  | <b>Int-H2O</b> |           |          |          |
| H | 0.86490   | -0.56885 | 5.41700  | C              | -5.35145  | -5.23563 | -4.75885 |
| H | 1.72179   | 5.98815  | 7.21447  | C              | -4.54612  | -4.91075 | -3.50383 |
| H | 2.34925   | 1.88587  | 4.28863  | O              | -4.54155  | -3.76369 | -3.04107 |
| H | 3.66330   | 2.84050  | 4.96010  | N              | -3.89266  | -5.95538 | -2.94063 |
| H | 3.87879   | -0.15718 | 3.19558  | C              | -3.30781  | -6.07097 | -1.60294 |
| H | 5.62473   | -0.11477 | 1.33987  | C              | -2.78799  | -4.76436 | -0.98840 |
| H | 6.28064   | 2.29549  | 0.74328  | O              | -1.89458  | -4.09828 | -1.52760 |
| H | 3.16632   | 4.73788  | 3.50678  | C              | -2.12593  | -7.05972 | -1.66544 |
| H | 1.17555   | 3.64202  | 5.36095  | O              | -2.65678  | -8.22467 | -2.31255 |
| H | 0.26146   | 5.06817  | -1.45409 | C              | -1.56752  | -7.39454 | -0.28427 |
| H | 1.44093   | 6.13831  | -0.68860 | N              | -3.29795  | -4.49876 | 0.22160  |
| H | 0.82735   | 6.71528  | 2.19305  | C              | -2.89507  | -3.37718 | 1.05009  |
| H | -1.48844  | 6.88655  | 3.18467  | C              | -3.47070  | -3.65052 | 2.45558  |
| H | -3.26757  | 5.83662  | 1.69500  | O              | -4.28753  | -4.55497 | 2.65335  |
| H | 0.91496   | 3.20461  | -0.00141 | C              | -3.35708  | -2.01587 | 0.46571  |
| H | 3.14632   | 4.64201  | 1.29950  | C              | -4.74172  | -2.00081 | -0.20323 |
| H | 3.21501   | 5.27590  | -3.38289 | C              | -5.89552  | -2.35676 | 0.74559  |
| H | 4.77600   | 5.28674  | -4.17751 | C              | -5.01291  | -0.64414 | -0.87059 |
| H | 5.76716   | 6.59422  | -2.27217 | N              | -3.01125  | -2.81002 | 3.40220  |
| H | 4.20688   | 6.54307  | -1.43517 | C              | -3.30060  | -2.97669 | 4.81666  |
| H | 4.40848   | 10.28585 | -2.56468 | C              | -4.10539  | -1.76660 | 5.29777  |
| H | 4.16518   | 9.19278  | -1.18394 | O              | -3.69067  | -0.61547 | 5.13164  |
| H | 5.75829   | 9.28001  | -1.99159 | C              | -1.99506  | -3.09287 | 5.63361  |
| H | 4.36724   | 3.13677  | -3.06260 | C              | -1.24642  | -4.33045 | 5.13081  |
| H | 4.37841   | 3.92338  | -0.30623 | O              | -1.61556  | -5.45488 | 5.45209  |
| H | 8.80585   | 3.10065  | -3.79833 | N              | -0.22313  | -4.06972 | 4.27873  |
| H | 6.50708   | 4.05360  | -4.13394 | C              | -6.13835  | 2.84598  | 4.28444  |
| H | 2.06090   | 1.75992  | -6.39113 | C              | -5.51876  | 3.36896  | 2.99224  |
| H | 1.53308   | 0.39696  | 1.58311  | O              | -5.49249  | 4.57097  | 2.72805  |
| H | -1.07408  | -0.22298 | 0.65033  | N              | -4.97386  | 2.43867  | 2.14147  |
|   |           |          |          | C              | -4.09485  | 2.93909  | 1.07872  |

|   |           |          |          |   |          |          |          |
|---|-----------|----------|----------|---|----------|----------|----------|
| C | -4.80885  | 3.25108  | -0.23486 | C | 4.28999  | 0.75545  | 2.75985  |
| O | -5.94790  | 2.87742  | -0.51471 | C | 5.51858  | 2.05975  | 1.47921  |
| C | -2.98178  | 1.87093  | 0.91708  | N | 5.28274  | 0.76371  | 1.81246  |
| C | -3.05947  | 1.12727  | 2.25076  | N | 2.18169  | 4.17724  | 1.18339  |
| C | -4.55396  | 1.08806  | 2.54954  | C | 1.56060  | 4.00983  | -0.12257 |
| N | -4.02342  | 3.95214  | -1.11030 | C | 2.49843  | 3.72096  | -1.29724 |
| C | -4.62048  | 4.66111  | -2.24044 | O | 1.97223  | 3.44821  | -2.38624 |
| C | -5.26306  | 3.77016  | -3.31195 | C | 0.70869  | 5.26125  | -0.53639 |
| O | -6.04510  | 4.25755  | -4.11984 | C | -0.30284 | 5.68529  | 0.48261  |
| C | -3.55863  | 5.54678  | -2.90461 | N | -1.65943 | 5.40724  | 0.36954  |
| N | -4.87417  | 2.45882  | -3.35353 | C | -0.06430 | 6.36118  | 1.65654  |
| C | -5.44373  | 1.53212  | -4.31179 | C | -2.22067 | 5.90965  | 1.45921  |
| C | -6.46178  | 0.54599  | -3.70145 | N | -1.29116 | 6.48790  | 2.26521  |
| O | -6.53343  | -0.61576 | -4.10564 | N | 3.84493  | 3.89151  | -1.20094 |
| C | -4.36318  | 0.77263  | -5.10768 | C | 4.62903  | 3.98360  | -2.43423 |
| C | -3.38434  | 0.05107  | -4.24141 | C | 6.13168  | 3.88651  | -2.11925 |
| N | -3.51518  | -1.26091 | -3.80563 | O | 6.55660  | 3.84494  | -0.96781 |
| C | -2.22054  | 0.50905  | -3.68504 | C | 4.29649  | 5.29916  | -3.18458 |
| C | -2.47595  | -1.59200 | -3.02758 | C | 4.68165  | 6.54341  | -2.38352 |
| N | -1.68020  | -0.52326 | -2.94813 | C | 4.14355  | 8.05380  | -3.27335 |
| N | -7.29862  | 1.07455  | -2.77354 | C | 4.68521  | 9.30287  | -2.05483 |
| C | -8.29831  | 0.24080  | -2.09941 | N | 6.93221  | 3.86893  | -3.22140 |
| C | -9.52058  | -0.09451 | -2.97943 | C | 8.39238  | 3.85669  | -3.17892 |
| O | -10.22769 | -1.05443 | -2.68824 | C | 2.00136  | 1.71722  | -5.42233 |
| C | -8.69885  | 0.90982  | -0.75673 | C | 2.55576  | 0.52687  | -4.65848 |
| C | -9.47191  | 2.22074  | -0.96614 | O | 2.73311  | -0.56157 | -5.22199 |
| C | -9.47407  | -0.05732 | 0.14576  | O | 6.34067  | -1.21186 | 0.11237  |
| C | 8.96954   | -1.87057 | 2.37226  | C | 6.50038  | -0.71423 | -1.01037 |
| C | 8.83695   | -2.56073 | 1.02402  | N | 7.51691  | -0.99934 | -1.84137 |
| O | 9.43672   | -2.17390 | 0.01675  | C | 7.51746  | -0.21975 | -3.07165 |
| N | 8.05159   | -3.67679 | 1.03574  | C | 6.07768  | 0.34791  | -3.12284 |
| C | 7.72415   | -4.40910 | -0.17658 | C | 5.61012  | 0.35804  | -1.65116 |
| C | 6.26666   | -4.15766 | -0.56429 | C | 4.10901  | 0.18846  | -1.30199 |
| O | 5.39240   | -4.11574 | 0.31937  | C | 3.19529  | -0.30873 | -2.41924 |
| C | 7.90817   | -5.92164 | 0.02610  | N | 2.84051  | 0.75496  | -3.35395 |
| N | 5.99031   | -4.08784 | -1.86910 | C | 1.93649  | -1.04578 | -1.89357 |
| C | 4.62476   | -3.91818 | -2.34213 | O | 2.15026  | -1.97413 | -1.01610 |
| C | 3.72531   | -5.04210 | -1.75810 | H | -5.11949 | -6.21074 | -5.19412 |
| O | 4.11114   | -6.20324 | -1.69490 | H | -1.35172 | -6.59091 | -2.28974 |
| C | 4.57136   | -3.97894 | -3.87941 | H | -0.76886 | -8.13763 | -0.38151 |
| C | 5.58334   | -3.06987 | -4.56745 | H | -2.35107 | -7.82197 | 0.34897  |
| O | 6.79810   | -3.20169 | -4.36738 | H | -1.14071 | -6.52356 | 0.22207  |
| N | 5.08586   | -2.15333 | -5.42822 | H | -1.92968 | -8.84100 | -2.46600 |
| N | 2.51263   | -4.58209 | -1.37017 | H | -4.06744 | -6.50902 | -0.94099 |
| C | 1.62913   | -5.31796 | -0.49714 | H | -3.94551 | -6.85562 | -3.40002 |
| C | 1.60816   | -4.76939 | 0.94178  | H | -2.61096 | -1.71302 | -0.27365 |
| O | 0.61239   | -4.95670 | 1.64854  | H | -3.32047 | -1.27506 | 1.26476  |
| N | 2.71867   | -4.10571 | 1.34630  | H | -4.72523 | -2.74819 | -1.00042 |
| C | 2.85198   | -3.49396 | 2.65980  | H | -5.79925 | -0.76065 | -1.61390 |
| C | 2.19094   | -2.10860 | 2.78760  | H | -5.33517 | 0.12322  | -0.16155 |
| O | 2.08447   | -1.59336 | 3.91225  | H | -4.12860 | -0.25817 | -1.38981 |
| C | 4.32239   | -3.39408 | 3.11219  | H | -6.85323 | -2.27942 | 0.21979  |
| O | 5.06924   | -2.39233 | 2.44034  | H | -5.80900 | -3.37042 | 1.14100  |
| N | 1.73976   | -1.55292 | 1.65411  | H | -5.93125 | -1.67284 | 1.60219  |
| C | 0.91014   | -0.36394 | 1.61401  | H | -1.80092 | -3.37313 | 1.13570  |
| C | -0.03011  | -0.33775 | 2.82469  | H | -3.98803 | -5.10168 | 0.65990  |
| O | -0.68590  | -1.34145 | 3.15036  | H | -2.24651 | -3.24543 | 6.68673  |
| C | 0.03312   | -0.40526 | 0.33569  | H | -1.41681 | -2.17089 | 5.53337  |
| S | 0.70645   | 0.46986  | -1.12289 | H | 0.09140  | -4.81125 | 3.66395  |
| N | -0.13174  | 0.84887  | 3.42767  | H | -0.11628 | -3.13401 | 3.90510  |
| C | -0.91227  | 1.12045  | 4.61976  | H | -3.85012 | -3.91143 | 4.91860  |
| C | -0.00448  | 1.22726  | 5.83803  | H | -2.26614 | -2.15217 | 3.17781  |
| O | 0.04238   | 2.25672  | 6.52589  | H | -5.35759 | 2.51716  | 4.97910  |
| N | 0.73149   | 0.13224  | 6.11151  | H | -2.01240 | 2.34510  | 0.74411  |
| C | 1.62445   | 0.15683  | 7.25039  | H | -3.19580 | 1.20058  | 0.08013  |
| C | 0.82024   | 5.82466  | 6.53167  | H | -2.58689 | 1.74203  | 3.01265  |
| C | 1.33168   | 5.62252  | 5.10942  | H | -2.58199 | 0.15085  | 2.26690  |
| O | 1.65341   | 6.56436  | 4.38278  | H | -5.06939 | 0.33387  | 1.94629  |
| N | 1.47800   | 4.32034  | 4.73454  | H | -4.75599 | 0.88116  | 3.59748  |
| C | 2.33036   | 3.92529  | 3.62602  | H | -3.64628 | 3.86604  | 1.43168  |
| C | 1.55960   | 3.74702  | 2.30643  | H | -4.00965 | 6.09930  | -3.73065 |
| O | 0.44506   | 3.20894  | 2.27245  | H | -3.14264 | 6.25114  | -2.17928 |
| C | 3.03961   | 2.61210  | 4.01419  | H | -2.73821 | 4.93434  | -3.29375 |
| C | 3.97417   | 2.07656  | 2.97684  | H | -5.44894 | 5.28653  | -1.88658 |
| N | 4.74298   | 2.89273  | 2.16134  | H | -3.15060 | 4.34895  | -0.74289 |

|   |           |          |          |                |           |          |          |
|---|-----------|----------|----------|----------------|-----------|----------|----------|
| H | -3.81511  | 1.49977  | -5.71211 | H              | -5.75938  | -1.18440 | 6.24021  |
| H | -4.85972  | 0.06966  | -5.77887 | C              | -5.94673  | -3.30769 | 6.07063  |
| H | -1.73645  | 1.46975  | -3.75410 | H              | -6.94263  | -3.13117 | 6.48021  |
| H | -2.32338  | -2.55289 | -2.54137 | H              | -6.05405  | -3.81027 | 5.10472  |
| H | -6.00673  | 2.15790  | -5.01379 | H              | -5.40940  | -3.97176 | 6.75552  |
| H | -4.32020  | 2.10304  | -2.58692 | H              | 1.98693   | -1.93340 | 0.73145  |
| H | -7.75241  | 1.15870  | -0.26029 | H              | 1.31504   | -1.32412 | -2.76741 |
| H | -9.69233  | 0.42405  | 1.10482  | N              | -9.77300  | 0.73672  | -4.02724 |
| H | -10.41453 | -0.36506 | -0.31676 | H              | -9.13008  | 1.49910  | -4.18284 |
| H | -8.89300  | -0.96326 | 0.34611  | C              | -10.89609 | 0.54863  | -4.92425 |
| H | -9.65758  | 2.70354  | -0.00231 | H              | -11.56300 | 1.41786  | -4.91092 |
| H | -10.43938 | 2.03637  | -1.44543 | H              | -10.55811 | 0.37948  | -5.95284 |
| H | -8.91764  | 2.93608  | -1.58233 | H              | -11.44688 | -0.32809 | -4.58153 |
| H | -7.85541  | -0.73779 | -1.89017 | H              | 6.05082   | 1.33681  | -3.58362 |
| H | -6.99796  | 1.92031  | -2.29686 | H              | 5.95688   | 1.29057  | -1.19026 |
| H | 9.55460   | -0.96031 | 2.24671  | H              | 5.45171   | -0.31316 | -3.72090 |
| H | 7.64060   | -6.46628 | -0.88370 | H              | 8.26791   | 0.58180  | -3.01926 |
| H | 7.25545   | -6.27219 | 0.83116  | H              | 8.31878   | -1.51627 | -1.47777 |
| H | 8.39822   | -4.04582 | -0.95531 | H              | 7.97522   | -1.62285 | 2.76025  |
| H | 7.38179   | -3.76360 | 1.79034  | H              | 9.46510   | -2.52980 | 3.09161  |
| H | 3.54930   | -3.75674 | -4.19728 | H              | 0.24074   | 6.74817  | 6.57887  |
| H | 4.80708   | -5.00445 | -4.18506 | H              | 0.22319   | 4.97945  | 6.88529  |
| H | 5.76319   | -1.54015 | -5.85991 | H              | -6.69654  | 3.66352  | 4.73998  |
| H | 4.12184   | -1.81990 | -5.39385 | H              | -6.80512  | 1.99817  | 4.10358  |
| H | 4.24450   | -2.95485 | -1.98536 | H              | -6.41164  | -5.20877 | -4.48977 |
| H | 6.72546   | -4.00137 | -2.56746 | H              | -5.18147  | -4.45386 | -5.50202 |
| H | 1.93990   | -6.36700 | -0.47316 | H              | 1.01281   | 1.44736  | -5.80568 |
| H | 0.59672   | -5.25895 | -0.85379 | H              | 1.91970   | 2.61971  | -4.81262 |
| H | 2.34220   | -3.55980 | -1.38060 | H              | 1.07948   | 0.47541  | 8.14154  |
| H | 4.78626   | -4.38368 | 3.00339  | H              | 2.02710   | -0.84523 | 7.40566  |
| H | 4.31253   | -3.11896 | 4.16950  | H              | 8.80306   | 4.76833  | -3.62370 |
| H | 5.26260   | -2.70549 | 1.53791  | H              | 8.69298   | 3.80071  | -2.13232 |
| H | 2.32345   | -4.11709 | 3.38859  | H              | 8.94616   | -6.14018 | 0.28845  |
| H | 3.51151   | -4.04300 | 0.71174  | H              | -4.32357  | -1.87762 | -3.91586 |
| H | -1.67236  | 0.34732  | 4.76256  | H              | -0.83250  | -0.38436 | -2.35059 |
| H | -1.39527  | 2.09259  | 4.51795  |                |           |          |          |
| H | 0.29470   | 1.67427  | 2.99786  |                |           |          |          |
| H | 2.45736   | 0.85462  | 7.09880  | <b>Reac-N3</b> |           |          |          |
| H | 0.87186   | -0.57987 | 5.39946  | C              | -5.54718  | -4.48773 | -5.12113 |
| H | 1.68719   | 5.93450  | 7.19153  | C              | -5.07107  | -4.45156 | -3.67853 |
| H | 2.29626   | 1.84305  | 4.25217  | O              | -4.99780  | -3.38557 | -3.06283 |
| H | 3.57947   | 2.82087  | 4.94710  | N              | -4.74094  | -5.64931 | -3.13393 |
| H | 3.92530   | -0.15642 | 3.20240  | C              | -4.42767  | -5.90073 | -1.73551 |
| H | 5.68166   | -0.06478 | 1.35971  | C              | -3.52103  | -4.82508 | -1.11903 |
| H | 6.25469   | 2.36207  | 0.75027  | O              | -2.50871  | -4.44047 | -1.72058 |
| H | 3.07788   | 4.71089  | 3.48743  | C              | -3.68959  | -7.25434 | -1.65237 |
| H | 1.11593   | 3.59762  | 5.35155  | O              | -4.52425  | -8.17829 | -2.36264 |
| H | 0.20990   | 5.01777  | -1.47642 | C              | -3.44726  | -7.71475 | -0.21850 |
| H | 1.40133   | 6.08870  | -0.73484 | N              | -3.86840  | -4.45511 | 0.12114  |
| H | 0.83926   | 6.69574  | 2.14213  | C              | -3.21495  | -3.42408 | 0.91606  |
| H | -1.45385  | 6.91270  | 3.16550  | C              | -3.69140  | -3.62548 | 2.36688  |
| H | -3.27385  | 5.88209  | 1.70820  | O              | -4.67443  | -4.32829 | 2.62558  |
| H | 0.89157   | 3.14976  | -0.05294 | C              | -3.51842  | -1.99559 | 0.38139  |
| H | 3.13793   | 4.49311  | 1.28556  | C              | -4.92258  | -1.77496 | -0.20787 |
| H | 3.22371   | 5.29532  | -3.39141 | C              | -6.06817  | -2.00229 | 0.78945  |
| H | 4.80229   | 5.30835  | -4.15672 | C              | -5.03801  | -0.37873 | -0.83808 |
| H | 5.76522   | 6.58562  | -2.22446 | N              | -2.97027  | -2.96851 | 3.30073  |
| H | 4.19903   | 6.51817  | -1.40108 | C              | -3.27091  | -3.09033 | 4.72361  |
| H | 4.42192   | 10.28295 | -2.45811 | C              | -4.02628  | -1.83970 | 5.19911  |
| H | 4.17325   | 9.16454  | -1.09854 | O              | -3.53051  | -0.71387 | 5.09864  |
| H | 5.76728   | 9.26126  | -1.90267 | C              | -1.98850  | -3.26354 | 5.55810  |
| H | 4.35838   | 3.14212  | -3.08220 | C              | -1.23426  | -4.49793 | 5.04997  |
| H | 4.34817   | 3.89722  | -0.31805 | O              | -1.64745  | -5.62485 | 5.29804  |
| H | 8.78571   | 2.98594  | -3.71190 | N              | -0.13281  | -4.22708 | 4.30119  |
| H | 6.49168   | 3.91860  | -4.12771 | C              | -5.91491  | 2.96677  | 4.47093  |
| H | 2.63905   | 1.90700  | -6.29019 | C              | -5.21047  | 3.49436  | 3.22542  |
| H | 1.52749   | 0.54212  | 1.61561  | O              | -5.03980  | 4.70000  | 3.03920  |
| H | -0.92586  | 0.07553  | 0.53504  | N              | -4.76155  | 2.55786  | 2.33293  |
| H | -0.15915  | -1.45086 | 0.07783  | C              | -3.82133  | 2.99533  | 1.29509  |
| H | 7.74254   | -0.86343 | -3.92608 | C              | -4.50479  | 3.41247  | -0.00854 |
| H | 3.71024   | 1.12911  | -0.91363 | O              | -5.66679  | 3.12741  | -0.29470 |
| H | 4.02913   | -0.52986 | -0.48126 | C              | -2.82826  | 1.81690  | 1.11049  |
| H | 3.70377   | -1.07994 | -3.00548 | C              | -3.03303  | 1.01980  | 2.40178  |
| H | 2.54786   | 1.64867  | -2.96224 | C              | -4.52883  | 1.14372  | 2.65971  |
| N | -5.27667  | -2.01648 | 5.92788  | N              | -3.67740  | 4.09737  | -0.85516 |
|   |           |          |          | C              | -4.23674  | 4.87614  | -1.95883 |

|   |           |          |          |   |          |          |          |
|---|-----------|----------|----------|---|----------|----------|----------|
| C | -5.02414  | 4.06070  | -2.99281 | C | 0.04463  | 5.79643  | 0.77262  |
| O | -5.91403  | 4.59915  | -3.64485 | N | -1.31002 | 5.51718  | 0.65134  |
| C | -3.10635  | 5.62977  | -2.67080 | C | 0.28994  | 6.39003  | 1.98935  |
| N | -4.63446  | 2.76973  | -3.19822 | C | -1.86690 | 5.94083  | 1.77543  |
| C | -5.26542  | 1.93793  | -4.20783 | N | -0.93400 | 6.46903  | 2.61261  |
| C | -6.37785  | 1.01418  | -3.66177 | N | 4.04123  | 3.87558  | -1.08257 |
| O | -6.55941  | -0.11014 | -4.12866 | C | 4.80039  | 3.92401  | -2.33480 |
| C | -4.23069  | 1.14499  | -5.02912 | C | 6.31102  | 3.85730  | -2.02901 |
| C | -3.29560  | 0.30707  | -4.21811 | O | 6.73653  | 3.85990  | -0.87721 |
| N | -3.55464  | -0.98184 | -3.79346 | C | 4.44763  | 5.20471  | -3.13416 |
| C | -2.03839  | 0.58989  | -3.73264 | C | 4.82791  | 6.48599  | -2.39127 |
| C | -2.47762  | -1.41776 | -3.08817 | S | 4.30173  | 7.95041  | -3.36096 |
| N | -1.53254  | -0.48677 | -3.03026 | C | 4.80430  | 9.25758  | -2.18757 |
| N | -7.17979  | 1.57237  | -2.71631 | N | 7.11753  | 3.81518  | -3.12742 |
| C | -8.25365  | 0.80629  | -2.08121 | C | 8.57958  | 3.89660  | -3.07297 |
| O | -9.52029  | 0.66298  | -2.95133 | C | 1.60835  | 1.99006  | -5.34837 |
| O | -10.31942 | -0.23828 | -2.71275 | C | 2.21862  | 0.73777  | -4.75361 |
| C | -8.56191  | 1.42351  | -0.68959 | O | 2.28389  | -0.31894 | -5.39191 |
| C | -9.14986  | 2.83939  | -0.79473 | O | 6.23634  | -1.36397 | -0.18999 |
| C | -9.46195  | 0.50974  | 0.15046  | C | 6.39253  | -0.79427 | -1.27699 |
| C | 8.96426   | -2.22404 | 2.05926  | N | 7.42918  | -0.98093 | -2.10939 |
| C | 8.86531   | -2.75359 | 0.64310  | C | 7.39264  | -0.15227 | -3.30549 |
| O | 9.34489   | -2.16657 | -0.33009 | C | 5.92900  | 0.35006  | -3.33735 |
| N | 8.21776   | -3.95081 | 0.54341  | C | 4.55504  | 0.26853  | -1.86969 |
| C | 7.77702   | -4.49141 | -0.72798 | C | 3.96240  | 0.00003  | -1.53247 |
| C | 6.27708   | -4.24452 | -0.89093 | C | 3.05224  | -0.32895 | -2.71994 |
| O | 5.52764   | -4.29540 | 0.10121  | N | 2.67437  | 0.85260  | -3.47608 |
| C | 8.02559   | -6.00616 | -0.80693 | C | 1.81939  | -1.15164 | -2.36727 |
| N | 5.83714   | -4.08555 | -2.14110 | O | 1.88299  | -2.13361 | -1.63561 |
| C | 4.41749   | -4.01643 | -2.44837 | H | -5.58046 | -5.48993 | -5.55523 |
| C | 3.72458   | -5.24817 | -1.79740 | H | -2.73150 | -7.12308 | -2.17715 |
| O | 4.22490   | -6.36141 | -1.88246 | H | -2.96806 | -8.69907 | -0.21968 |
| C | 4.19444   | -4.04246 | -3.97333 | H | -4.39426 | -7.79836 | 0.32328  |
| C | 5.07548   | -3.06581 | -4.74928 | H | -2.79173 | -7.02828 | 0.32318  |
| O | 6.30899   | -3.10320 | -4.65266 | H | -4.04955 | -9.01595 | -2.43620 |
| N | 4.45105   | -2.19719 | -5.57704 | H | -5.35961 | -5.98026 | -1.15848 |
| N | 2.57160   | -4.95782 | -1.14573 | H | -4.90426 | -6.49474 | -3.66381 |
| C | 1.95088   | -5.84729 | -0.18385 | H | -2.78042 | -1.77866 | -0.39535 |
| C | 1.99781   | -5.28571 | 1.24629  | H | -3.33405 | -1.28796 | 1.19175  |
| O | 1.16345   | -5.63504 | 2.07877  | H | -5.04245 | -2.49263 | -1.02158 |
| N | 2.99503   | -4.39686 | 1.49576  | H | -5.85798 | -0.37707 | -1.55388 |
| C | 3.14394   | -3.70751 | 2.76331  | H | -5.24046 | 0.40637  | -0.10538 |
| C | 2.37031   | -2.37153 | 2.83884  | H | -4.13173 | -0.10250 | -1.38555 |
| O | 2.42766   | -1.70898 | 3.86511  | H | -7.02684 | -1.76253 | 0.31793  |
| C | 4.62711   | -3.44882 | 3.09213  | H | -6.11689 | -3.03214 | 1.14761  |
| O | 5.22770   | -2.49142 | 2.23386  | H | -5.96590 | -1.36115 | 1.67268  |
| C | 0.87225   | -0.60271 | 1.70980  | H | -2.13168 | -3.57767 | 0.88763  |
| C | 0.05868   | -0.45383 | 2.98852  | H | -4.69051 | -4.84837 | 0.56776  |
| O | -0.52859  | -1.42897 | 3.50155  | H | -2.27684 | -3.44898 | 6.59653  |
| C | -0.10329  | -0.43114 | 0.51003  | H | -1.39978 | -2.34729 | 5.51012  |
| S | 0.45399   | 0.85395  | -0.67916 | H | 0.26722  | -4.97037 | 3.73506  |
| N | -0.03503  | 0.78293  | 3.48313  | H | -0.00601 | -3.28028 | 3.96399  |
| C | -0.76512  | 1.12199  | 4.69648  | H | -3.86667 | -3.99483 | 4.83396  |
| C | 0.17122   | 1.11555  | 5.89565  | H | -2.14951 | -2.42180 | 3.05055  |
| O | 0.42773   | 2.14263  | 6.53981  | H | -5.19287 | 2.50638  | 5.15443  |
| N | 0.71610   | -0.08571 | 6.16104  | H | -1.80797 | 2.18611  | 0.98296  |
| C | 1.75373   | -0.24145 | 7.15184  | H | -3.08434 | 1.21859  | 0.23250  |
| C | 1.18205   | 5.49108  | 6.83861  | H | -2.52705 | 1.53388  | 3.21304  |
| C | 1.70793   | 5.40050  | 5.40604  | H | -2.67312 | -0.00696 | 2.39238  |
| O | 2.03797   | 6.39316  | 4.75411  | H | -5.11453 | 0.50329  | 1.99463  |
| N | 1.85173   | 4.12848  | 4.94093  | H | -4.78330 | 0.90028  | 3.68811  |
| C | 2.66899   | 3.79366  | 3.79052  | H | -3.28132 | 3.85939  | 1.67934  |
| C | 1.86111   | 3.68780  | 2.48698  | H | -3.52194 | 6.24052  | -3.47505 |
| O | 0.74176   | 3.16279  | 2.45481  | H | -2.57653 | 6.27551  | -1.96473 |
| C | 3.36552   | 2.44643  | 4.07747  | H | -2.38677 | 4.92345  | -3.09800 |
| C | 4.23624   | 1.93115  | 2.97365  | H | -4.97091 | 5.59324  | -1.57332 |
| N | 5.00682   | 2.74817  | 2.16182  | H | -2.79322 | 4.44668  | -0.47058 |
| C | 4.47169   | 0.61008  | 2.67156  | H | -3.63635 | 1.86618  | -5.59743 |
| C | 5.70107   | 1.91646  | 1.39588  | H | -4.77684 | 0.52075  | -5.74021 |
| N | 5.41175   | 0.61705  | 1.67157  | H | -1.47249 | 1.50372  | -3.85852 |
| N | 2.46515   | 4.16344  | 1.37107  | H | -2.44116 | -2.40456 | -2.64826 |
| C | 1.80937   | 4.08895  | 0.07671  | H | -5.77664 | 2.63749  | -4.87939 |
| C | 2.68982   | 3.73349  | -1.12401 | H | -3.95687 | 2.35353  | -2.57286 |
| O | 2.11273   | 3.43220  | -2.18126 | H | -7.59016 | 1.50639  | -0.18716 |
| C | 1.04881   | 5.41436  | -0.27073 | H | -9.59611 | 0.93775  | 1.14965  |

|   |           |          |          |                |           |          |          |
|---|-----------|----------|----------|----------------|-----------|----------|----------|
| H | -10.44292 | 0.38211  | -0.31283 | C              | -10.84982 | 1.58148  | -4.81540 |
| H | -9.02227  | -0.48629 | 0.26393  | H              | -11.51285 | 0.78033  | -4.48636 |
| H | -9.27847  | 3.26496  | 0.20492  | H              | -11.38992 | 2.53381  | -4.77737 |
| H | -10.12848 | 2.82457  | -1.28657 | H              | -10.54691 | 1.38985  | -5.85149 |
| H | -8.49885  | 3.52090  | -1.35126 | H              | 5.85849   | 1.35564  | -3.75440 |
| H | -7.91576  | -0.22607 | -1.94615 | H              | 5.74698   | 1.19395  | -1.35792 |
| H | -6.81332  | 2.36864  | -2.20530 | H              | 5.34081   | -0.31314 | -3.97165 |
| H | 9.60534   | -1.34338 | 2.07046  | H              | 8.10465   | 0.68039  | -3.22236 |
| H | 7.66168   | -6.40588 | -1.75703 | H              | 8.25109   | -1.47816 | -1.76049 |
| H | 7.48697   | -6.51760 | -0.00341 | H              | 7.95748   | -1.95213 | 2.39954  |
| H | 8.33930   | -3.97316 | -1.50767 | H              | 9.36278   | -2.98210 | 2.74025  |
| H | 7.65949   | -4.23707 | 1.33769  | H              | 0.63219   | 6.42582  | 6.96032  |
| H | 3.13223   | -3.87535 | -4.17191 | H              | 0.55437   | 4.63695  | 7.10432  |
| H | 4.44946   | -5.04604 | -4.33211 | H              | -6.38378  | 3.81352  | 4.97193  |
| H | 5.04806   | -1.55469 | -6.07920 | H              | -6.67339  | 2.21832  | 4.22536  |
| H | 3.47429   | -1.92413 | -5.50392 | H              | -6.54367  | -4.04018 | -5.15838 |
| H | 4.00211   | -3.09745 | -2.02395 | H              | -4.88438  | -3.85897 | -5.72211 |
| H | 6.47678   | -3.94110 | -2.91990 | H              | 0.54246   | 1.79873  | -5.50761 |
| H | 2.47262   | -6.80728 | -0.22371 | H              | 1.72262   | 2.86655  | -4.70699 |
| H | 0.89454   | -5.99407 | -0.41053 | H              | 2.63494   | -0.70479 | 6.69707  |
| H | 2.24521   | -4.00148 | -1.14927 | H              | 2.01314   | 0.74472  | 7.53658  |
| H | 5.16133   | -4.40824 | 3.06870  | H              | 8.93301   | 4.85429  | -3.46789 |
| H | 4.67467   | -3.04041 | 4.10436  | H              | 8.87783   | 3.80712  | -2.02826 |
| H | 5.43736   | -2.91021 | 1.37891  | H              | 9.09351   | -6.21494 | -0.70833 |
| H | 2.71642   | -4.33934 | 3.55170  | H              | -4.43458  | -1.49084 | -3.86362 |
| H | 3.70842   | -4.25380 | 0.78621  | H              | -0.41081  | 0.46584  | -1.65860 |
| H | -1.58705  | 0.41607  | 4.84702  | O              | -0.19706  | -3.62890 | -0.48945 |
| H | -1.14902  | 2.13728  | 4.59824  | H              | 0.29961   | -3.08353 | -1.11923 |
| H | 0.41063   | 1.57547  | 3.01183  | H              | -0.99302  | -3.94090 | -0.96670 |
| H | 1.41827   | -0.86811 | 7.98561  | C              | 1.55435   | -1.97248 | 1.63756  |
| H | 0.53308   | -0.85132 | 5.52380  | H              | 0.80976   | -2.76061 | 1.47199  |
| H | 2.04184   | 5.51132  | 7.51650  | H              | 2.19513   | -2.01724 | 0.75101  |
| H | 2.60558   | 1.68948  | 4.30529  |                |           |          |          |
| H | 3.94935   | 2.58888  | 4.99562  | <b>TS-1-N3</b> |           |          |          |
| H | 4.09496   | -0.30405 | 3.09396  | C              | -5.34968  | -4.68750 | -5.18875 |
| H | 5.75117   | -0.21102 | 1.17688  | C              | -4.79360  | -4.57362 | -3.77720 |
| H | 6.41677   | 2.22091  | 0.64743  | O              | -4.74111  | -3.48324 | -3.19924 |
| H | 3.42135   | 4.57874  | 3.67584  | N              | -4.38322  | -5.73809 | -3.21876 |
| H | 1.44699   | 3.37168  | 5.48928  | C              | -3.96788  | -5.97222 | -1.84237 |
| H | 0.54949   | 5.26641  | -1.23087 | C              | -3.20776  | -4.79945 | -1.21352 |
| H | 1.78857   | 6.21481  | -0.39595 | O              | -2.25071  | -4.28027 | -1.80843 |
| H | 1.19510   | 6.69388  | 2.49253  | C              | -3.03147  | -7.20084 | -1.83517 |
| H | -1.09366  | 6.83099  | 3.54051  | O              | -3.77343  | -8.22840 | -2.50378 |
| H | -2.91792  | 5.88615  | 2.03131  | C              | -2.61841  | -7.63079 | -0.43107 |
| H | 1.06180   | 3.29878  | 0.14886  | N              | -3.59272  | -4.50223 | 0.03321  |
| H | 3.41332   | 4.50080  | 1.47096  | C              | -3.03484  | -3.45168 | 0.87384  |
| H | 3.37304   | 5.18411  | -3.32990 | C              | -3.47495  | -3.77074 | 2.31417  |
| H | 4.94362   | 5.17612  | -4.11125 | O              | -4.41452  | -4.54251 | 2.53822  |
| H | 5.90983   | 6.53449  | -2.22223 | C              | -3.49599  | -2.02967 | 0.43634  |
| H | 4.33473   | 6.50981  | -1.41403 | C              | -4.88760  | -1.93347 | -0.21158 |
| H | 4.54539   | 10.21599 | -2.64237 | C              | -6.03771  | -2.31120 | 0.73352  |
| H | 4.26800   | 9.15961  | -1.23969 | C              | -5.12787  | -0.53373 | -0.79420 |
| H | 5.88228   | 9.23119  | -2.00591 | N              | -2.78300  | -3.12322 | 3.27331  |
| H | 4.52234   | 3.05690  | -2.94494 | C              | -3.09225  | -3.29163 | 4.68907  |
| H | 4.56769   | 3.92548  | -0.21482 | C              | -3.92264  | -2.09119 | 5.16924  |
| H | 9.02692   | 3.08106  | -3.64782 | O              | -3.49250  | -0.93822 | 5.07398  |
| H | 6.68242   | 3.86855  | -4.03635 | C              | -1.81074  | -3.40402 | 5.53394  |
| H | 2.05538   | 2.17423  | -6.32825 | C              | -0.98618  | -4.59274 | 5.02414  |
| H | 1.63912   | 0.18010  | 1.70166  | O              | -1.34378  | -5.74117 | 5.26111  |
| H | -1.09291  | -0.13997 | 0.85733  | N              | 0.10804   | -4.25936 | 4.29179  |
| H | -0.21445  | -1.37552 | -0.02057 | C              | -6.05085  | 2.61904  | 4.49811  |
| H | 7.63913   | -0.74585 | -4.18973 | C              | -5.42527  | 3.21117  | 3.23975  |
| H | 3.53584   | 0.85568  | -1.00311 | O              | -5.38597  | 4.42571  | 3.04331  |
| H | 3.92232   | -0.83444 | -0.82593 | N              | -4.88931  | 2.32269  | 2.34399  |
| H | 3.58483   | -0.99556 | -3.40758 | C              | -4.01354  | 2.86190  | 1.29716  |
| H | 2.46003   | 1.70605  | -2.95870 | C              | -4.75239  | 3.27049  | 0.02307  |
| N | -5.24380  | -2.03019 | 5.76202  | O              | -5.89964  | 2.91966  | -0.25254 |
| H | -5.68470  | -1.17449 | 6.07260  | C              | -2.93912  | 1.77100  | 1.05253  |
| C | -6.03655  | -3.26032 | 5.75895  | C              | -3.00651  | 0.96944  | 2.35424  |
| H | -7.06568  | -3.00312 | 6.01583  | C              | -4.49418  | 0.94678  | 2.68081  |
| H | -6.03023  | -3.72796 | 4.77029  | N              | -3.98656  | 4.02893  | -0.81864 |
| H | -5.67101  | -3.98158 | 6.49788  | C              | -4.60923  | 4.79640  | -1.89568 |
| H | 0.89477   | -0.91915 | -2.91917 | C              | -5.28292  | 3.95725  | -2.99071 |
| N | -9.70741  | 1.59614  | -3.92437 | O              | -6.11963  | 4.47085  | -3.72570 |
| H | -8.97575  | 2.27988  | -4.05648 | C              | -3.56032  | 5.70843  | -2.54371 |

|   |           |          |          |   |           |          |          |
|---|-----------|----------|----------|---|-----------|----------|----------|
| N | -4.85743  | 2.66803  | -3.13385 | C | -2.13062  | 5.84985  | 1.80373  |
| C | -5.41428  | 1.78433  | -4.13946 | N | -1.18074  | 6.41669  | 2.59453  |
| C | -6.48360  | 0.80715  | -3.60067 | N | 3.82375   | 4.00308  | -1.09926 |
| O | -6.61286  | -0.31689 | -4.08364 | C | 4.58199   | 4.11698  | -2.34717 |
| C | -4.31700  | 1.03059  | -4.91962 | C | 6.09130   | 4.16719  | -2.03423 |
| C | -3.33171  | 0.31600  | -4.05124 | O | 6.50800   | 4.25408  | -0.88220 |
| N | -3.42145  | -1.01136 | -3.66843 | C | 4.14413   | 5.37624  | -3.13968 |
| C | -2.19005  | 0.78698  | -3.44780 | C | 4.41672   | 6.67405  | -2.37816 |
| C | -2.36882  | -1.30827 | -2.87538 | S | 3.78638   | 8.10526  | -3.33549 |
| N | -1.60317  | -0.22959 | -2.72501 | C | 4.17752   | 9.43243  | -2.14219 |
| N | -7.30674  | 1.31470  | -2.64469 | N | 6.90518   | 4.14175  | -3.12776 |
| C | -8.34181  | 0.48292  | -2.02544 | C | 8.35413   | 4.35650  | -3.07443 |
| C | -9.57633  | 0.25411  | -2.92107 | C | 1.41402   | 1.87770  | -5.26825 |
| O | -10.31953 | -0.69681 | -2.69528 | C | 2.11286   | 0.67137  | -4.67296 |
| C | -8.71750  | 1.08309  | -0.64350 | O | 2.20130   | -0.39473 | -5.29573 |
| C | -9.41980  | 2.44373  | -0.76941 | O | 6.38891   | -1.03817 | -0.17177 |
| C | -9.54779  | 0.10161  | 0.19198  | C | 6.46954   | -0.50114 | -1.28357 |
| C | 9.05744   | -1.80157 | 1.97864  | N | 7.48112   | -0.66372 | -2.15137 |
| C | 9.01992   | -2.36302 | 0.57371  | C | 7.36011   | 0.12501  | -3.36852 |
| O | 9.47656   | -1.76773 | -0.40511 | C | 5.87481   | 0.56254  | -3.35579 |
| N | 8.44938   | -3.60103 | 0.49069  | C | 5.45125   | 0.48652  | -1.87194 |
| C | 8.01931   | -4.16581 | -0.77337 | C | 3.98873   | 0.13030  | -1.48535 |
| C | 6.51041   | -3.97014 | -0.92287 | C | 3.06763   | -0.29164 | -2.63051 |
| O | 5.77284   | -4.01987 | 0.07821  | N | 2.60935   | 0.84064  | -3.41980 |
| C | 8.31733   | -5.67186 | -0.84440 | C | 1.89239   | -1.17380 | -2.21007 |
| N | 6.05037   | -3.85697 | -2.17068 | O | 2.06356   | -2.15251 | -1.46740 |
| C | 4.62512   | -3.87760 | -2.45664 | H | -5.31788  | -5.69923 | -5.59964 |
| C | 4.02249   | -5.14311 | -1.77896 | H | -2.14422  | -6.92260 | -2.42297 |
| O | 4.59551   | -6.22239 | -1.84784 | H | -2.01987  | -8.54580 | -0.48476 |
| C | 4.38046   | -3.92762 | -3.97712 | H | -3.49787  | -7.83598 | 0.18665  |
| C | 5.19906   | -2.91054 | -4.76963 | H | -2.01045  | -6.86877 | 0.06372  |
| O | 6.43577   | -2.90672 | -4.71345 | H | -3.19138  | -8.98895 | -2.62718 |
| N | 4.51625   | -2.05410 | -5.56280 | H | -4.85057  | -6.21623 | -1.23534 |
| N | 2.86054   | -4.91456 | -1.11971 | H | -4.50364  | -6.59727 | -3.73849 |
| C | 2.31403   | -5.81677 | -0.12609 | H | -2.75566  | -1.64650 | -0.26992 |
| C | 2.33976   | -5.22452 | 1.29276  | H | -3.44670  | -1.38137 | 1.31236  |
| O | 1.56297   | -5.64119 | 2.14979  | H | -4.90276  | -2.62791 | -1.05544 |
| N | 3.25245   | -4.24088 | 1.50608  | H | -5.93900  | -0.58601 | -1.51692 |
| C | 3.37714   | -3.53510 | 2.76780  | H | -5.40379  | 0.20516  | -0.03749 |
| C | 2.53536   | -2.23953 | 2.84681  | H | -4.24863  | -0.15407 | -1.32335 |
| O | 2.56072   | -1.57810 | 3.87569  | H | -6.99834  | -2.20323 | 0.21896  |
| C | 4.84800   | -3.19886 | 3.08014  | H | -5.96168  | -3.33627 | 1.10066  |
| O | 5.38892   | -2.21732 | 2.20957  | H | -6.05885  | -1.65531 | 1.61233  |
| C | 0.93006   | -0.56493 | 1.71170  | H | -1.94253  | -3.49662 | 0.82442  |
| C | 0.10705   | -0.47204 | 2.98823  | H | -4.36126  | -5.00033 | 0.47202  |
| O | -0.42005  | -1.48257 | 3.50162  | H | -2.09787  | -3.61443 | 6.56793  |
| C | -0.05653  | -0.45180 | 0.51334  | H | -1.27197  | -2.45692 | 5.50039  |
| S | 0.52696   | 0.60868  | -0.86874 | H | 0.56379   | -4.97927 | 3.73696  |
| N | -0.06522  | 0.75379  | 3.49027  | H | 0.19030   | -3.30582 | 3.95935  |
| C | -0.82126  | 1.03795  | 4.70249  | H | -3.63644  | -4.23054 | 4.77653  |
| C | 0.10876   | 1.05222  | 5.90647  | H | -1.99802  | -2.51597 | 3.04559  |
| O | 0.32108   | 2.08071  | 6.56454  | H | -5.27270  | 2.25977  | 5.18055  |
| N | 0.70663   | -0.12717 | 6.15395  | H | -1.96086  | 2.22306  | 0.87154  |
| C | 1.77566   | -0.24072 | 7.11637  | H | -3.19466  | 1.14787  | 0.19179  |
| C | 0.92131   | 5.46016  | 6.87754  | H | -2.51053  | 1.54204  | 3.13270  |
| C | 1.38953   | 5.40323  | 5.42079  | H | -2.54955  | -0.01748 | 2.32796  |
| O | 1.62290   | 6.41705  | 4.75940  | H | -5.03887  | 0.23182  | 2.05636  |
| N | 1.60164   | 4.14411  | 4.94466  | H | -4.67634  | 0.69704  | 3.72303  |
| C | 2.41425   | 3.86298  | 3.77553  | H | -3.52832  | 3.75208  | 1.69574  |
| C | 1.59650   | 3.72075  | 2.47754  | H | -4.02989  | 6.30326  | -3.32931 |
| O | 0.46995   | 3.20960  | 2.46422  | H | -3.12045  | 6.37491  | -1.79682 |
| C | 3.20196   | 2.56229  | 4.04849  | H | -2.75504  | 5.11149  | -2.98513 |
| C | 4.11413   | 2.11703  | 2.94639  | H | -5.42513  | 5.40610  | -1.48965 |
| N | 4.80746   | 2.99063  | 2.12223  | H | -3.10541  | 4.40339  | -0.44755 |
| C | 4.46986   | 0.82046  | 2.65820  | H | -3.77303  | 1.76270  | -5.52266 |
| C | 5.57411   | 2.21640  | 1.36376  | H | -4.80650  | 0.32609  | -5.59472 |
| N | 5.40436   | 0.90092  | 1.65610  | H | -1.75710  | 1.77592  | -3.48346 |
| N | 2.21097   | 4.16083  | 1.35156  | H | -2.21267  | -2.28661 | -2.44026 |
| C | 1.57104   | 4.03332  | 0.05007  | H | -5.94397  | 2.44054  | -4.83968 |
| C | 2.48657   | 3.76086  | -1.14742 | H | -4.23869  | 2.28619  | -2.43166 |
| O | 1.94223   | 3.43387  | -2.21364 | H | -7.76318  | 1.25004  | -0.12860 |
| C | 0.73301   | 5.31098  | -0.31449 | H | -9.74432  | 0.52907  | 1.18095  |
| C | -0.25043  | 5.70613  | 0.74276  | H | -10.50137 | -0.12390 | -0.29075 |
| N | -1.60415  | 5.40512  | 0.67253  | H | -9.01769  | -0.84615 | 0.33161  |
| C | 0.02188   | 6.34018  | 1.93290  | H | -9.58778  | 2.87115  | 0.22352  |



|   |           |          |          |               |           |          |          |
|---|-----------|----------|----------|---------------|-----------|----------|----------|
| H | -10.39156 | 2.34222  | -1.26456 | H             | -10.58485 | 0.92949  | -5.84853 |
| H | -8.82387  | 3.16724  | -1.33477 | H             | 5.74588   | 1.55762  | -3.78515 |
| H | -7.94286  | -0.52559 | -1.87799 | H             | 5.69748   | 1.44067  | -1.38926 |
| H | -6.96737  | 2.10736  | -2.10785 | H             | 5.29407   | -0.13419 | -3.95979 |
| H | 9.64650   | -0.88514 | 1.98600  | H             | 8.03767   | 0.98974  | -3.33905 |
| H | 7.95636   | -6.09079 | -1.78722 | H             | 8.33553   | -1.11794 | -1.82367 |
| H | 7.80416   | -6.19510 | -0.03185 | H             | 8.02910   | -1.58205 | 2.29068  |
| H | 8.55639   | -3.63372 | -1.56166 | H             | 9.48367   | -2.52150 | 2.68402  |
| H | 7.89748   | -3.89845 | 1.28569  | H             | 0.32274   | 6.36027  | 7.02642  |
| H | 3.30831   | -3.81557 | -4.15977 | H             | 0.35741   | 4.56953  | 7.16575  |
| H | 4.68307   | -4.91808 | -4.33512 | H             | -6.61490  | 3.40936  | 4.99317  |
| H | 5.07494   | -1.38393 | -6.07290 | H             | -6.71400  | 1.77996  | 4.27014  |
| H | 3.53212   | -1.81689 | -5.45008 | H             | -6.38414  | -4.33420 | -5.17159 |
| H | 4.15998   | -2.98408 | -2.03081 | H             | -4.78706  | -4.01634 | -5.84317 |
| H | 6.67400   | -3.71870 | -2.96293 | H             | 0.34493   | 1.64858  | -5.32869 |
| H | 2.89687   | -6.74155 | -0.14945 | H             | 1.54764   | 2.78417  | -4.67433 |
| H | 1.26661   | -6.04081 | -0.33145 | H             | 2.66457   | -0.65731 | 6.63241  |
| H | 2.48021   | -3.97701 | -1.14260 | H             | 1.99762   | 0.75314  | 7.50483  |
| H | 5.43114   | -4.12931 | 3.05686  | H             | 8.62319   | 5.31815  | -3.52262 |
| H | 4.88500   | -2.78164 | 4.08938  | H             | 8.65057   | 4.35303  | -2.02541 |
| H | 5.61742   | -2.62903 | 1.35606  | H             | 9.39258   | -5.84422 | -0.75523 |
| H | 2.99108   | -4.18619 | 3.56168  | H             | -4.19863  | -1.66052 | -3.81980 |
| H | 3.93513   | -4.04727 | 0.77895  | H             | -0.60632  | 0.11499  | -1.86955 |
| H | -1.61473  | 0.29610  | 4.83223  | O             | 0.03409   | -3.71943 | -0.37514 |
| H | -1.24467  | 2.03839  | 4.61897  | H             | 0.60245   | -3.12295 | -0.89449 |
| H | 0.30427   | 1.57746  | 3.00827  | H             | -0.71039  | -3.96079 | -0.95855 |
| H | 1.49339   | -0.89017 | 7.95245  | C             | 1.70058   | -1.88632 | 1.64733  |
| H | 0.55973   | -0.88770 | 5.50125  | H             | 1.00627   | -2.72068 | 1.49048  |
| H | 1.80792   | 5.52942  | 7.51645  | H             | 2.33942   | -1.89869 | 0.75937  |
| H | 2.49737   | 1.75104  | 4.26754  |               |           |          |          |
| H | 3.77206   | 2.73618  | 4.96992  | <b>Int-N3</b> |           |          |          |
| H | 4.17594   | -0.11950 | 3.08870  | C             | -5.23695  | -4.89951 | -5.19538 |
| H | 5.81050   | 0.10042  | 1.16404  | C             | -4.60189  | -4.70104 | -3.82707 |
| H | 6.25712   | 2.57651  | 0.60947  | O             | -4.60064  | -3.58996 | -3.28515 |
| H | 3.11435   | 4.69381  | 3.65091  | N             | -4.07470  | -5.81852 | -3.27176 |
| H | 1.26523   | 3.36283  | 5.50455  | C             | -3.52477  | -6.01161 | -1.93476 |
| H | 0.21236   | 5.10447  | -1.25207 | C             | -2.94654  | -4.75052 | -1.29662 |
| H | 1.43378   | 6.13539  | -0.49639 | O             | -2.06894  | -4.09732 | -1.88775 |
| H | 0.93646   | 6.66957  | 2.40022  | C             | -2.37774  | -7.04256 | -2.03460 |
| H | -1.30645  | 6.78916  | 3.52365  | O             | -2.98096  | -8.18854 | -2.64635 |
| H | -3.17262  | 5.78746  | 2.09128  | C             | -1.75349  | -7.37696 | -0.68288 |
| H | 0.88557   | 3.18460  | 0.10088  | N             | -3.35572  | -4.52175 | -0.04676 |
| H | 3.19569   | 4.38727  | 1.44695  | C             | -2.86996  | -3.45785 | 0.82324  |
| H | 3.07663   | 5.27634  | -3.34917 | C             | -3.33053  | -3.82706 | 2.24402  |
| H | 4.65598   | 5.39536  | -4.10872 | O             | -4.24283  | -4.64205 | 2.42677  |
| H | 5.48966   | 6.80519  | -2.19712 | C             | -3.37262  | -2.05004 | 0.39334  |
| H | 3.91414   | 6.64764  | -1.40580 | C             | -4.74892  | -1.99135 | -0.29041 |
| H | 3.84854   | 10.37384 | -2.58714 | C             | -5.90687  | -2.44944 | 0.60796  |
| H | 3.64385   | 9.28088  | -1.19989 | C             | -5.03423  | -0.58299 | -0.83363 |
| H | 5.25298   | 9.48698  | -1.95200 | N             | -2.68234  | -3.18299 | 3.23435  |
| H | 4.36910   | 3.23665  | -2.96413 | C             | -3.01311  | -3.41280 | 4.63561  |
| H | 4.34024   | 4.12719  | -0.23398 | C             | -3.90297  | -2.26885 | 5.14056  |
| H | 8.87724   | 3.55277  | -3.59995 | O             | -1.09055  | -1.09055 | 5.04237  |
| H | 6.47155   | 4.11662  | -4.03876 | C             | -1.74824  | -3.50243 | 5.50738  |
| H | 1.77315   | 2.03079  | -6.28849 | C             | -0.87450  | -4.65266 | 4.99012  |
| H | 1.63516   | 0.27286  | 1.69715  | O             | -1.21177  | -5.81578 | 5.18302  |
| H | -0.99598  | -0.01134 | 0.84416  | N             | 0.23279   | -4.26951 | 4.30612  |
| H | -0.28047  | -1.45094 | 0.13517  | C             | -6.15761  | 2.33291  | 4.52863  |
| H | 7.59810   | -0.48450 | -4.24445 | C             | -5.57177  | 2.99727  | 3.28890  |
| H | 3.52237   | 0.96917  | -0.96298 | O             | -5.60227  | 4.21652  | 3.12846  |
| H | 4.02173   | -0.68689 | -0.75865 | N             | -4.98718  | 2.16763  | 2.36462  |
| H | 3.61508   | -0.95501 | -3.31013 | C             | -4.13148  | 2.79136  | 1.35035  |
| H | 2.37467   | 1.70195  | -2.92526 | C             | -4.86645  | 3.18392  | 0.06939  |
| N | -5.13007  | -2.35457 | 5.72377  | O             | -5.99803  | 2.80049  | -0.22852 |
| H | -5.62276  | -1.52788 | 6.03499  | C             | -2.97510  | 1.78638  | 1.10421  |
| C | -5.84485  | -3.63135 | 5.71733  | C             | -3.02342  | 0.93055  | 2.37164  |
| H | -6.88478  | -3.44098 | 5.98835  | C             | -4.51384  | 0.80760  | 2.66314  |
| H | -5.82124  | -4.08884 | 4.72408  | N             | -4.11152  | 3.97484  | -0.75353 |
| H | -5.42664  | -4.33512 | 6.44495  | C             | -4.74176  | 4.75745  | -1.81510 |
| H | 1.02804   | -1.12816 | -2.88791 | C             | -5.36679  | 3.94231  | -2.95547 |
| N | -9.80028  | 1.16849  | -3.90312 | O             | -6.14768  | 4.47975  | -3.73222 |
| H | -9.11788  | 1.90424  | -4.01618 | C             | -3.71500  | 5.73023  | -2.40893 |
| C | -10.92189 | 1.07988  | -4.81637 | N             | -4.96658  | 2.64079  | -3.08783 |
| H | -11.52642 | 0.22453  | -4.51216 | C             | -5.50942  | 1.78038  | -4.11946 |
| H | -11.53592 | 1.98626  | -4.77528 | C             | -6.51524  | 0.73205  | -3.59562 |

|   |           |          |          |   |           |          |          |
|---|-----------|----------|----------|---|-----------|----------|----------|
| O | -6.55405  | -0.40067 | -4.07848 | C | 4.40803   | 4.19851  | -2.36066 |
| C | -4.40103  | 1.10236  | -4.95189 | C | 5.90677   | 4.34463  | -2.03295 |
| C | -3.42066  | 0.34059  | -4.12179 | O | 6.29598   | 4.55936  | -0.88768 |
| N | -3.53543  | -1.00166 | -3.78720 | C | 3.92219   | 5.41053  | -3.19834 |
| C | -2.28029  | 0.77831  | -3.50096 | C | 4.11862   | 6.74272  | -2.47340 |
| C | -2.51010  | -1.36701 | -3.00647 | S | 3.42588   | 8.11032  | -3.47974 |
| N | -1.73758  | -0.29393 | -2.82395 | C | 3.74530   | 9.49210  | -2.32777 |
| N | -7.37451  | 1.17477  | -2.64218 | N | 6.73827   | 4.26770  | -3.10944 |
| C | -8.33327  | 0.26222  | -2.00902 | C | 8.16985   | 4.57409  | -3.05858 |
| C | -9.54836  | -0.08426 | -2.89375 | C | 1.36782   | 1.82258  | -5.21417 |
| O | -10.19236 | -1.10218 | -2.65836 | C | 2.05432   | 0.62610  | -4.57868 |
| C | -8.75070  | 0.84137  | -0.62981 | O | 2.12250   | -0.45597 | -5.17819 |
| C | -9.57104  | 2.13348  | -0.76321 | O | 6.49088   | -0.79239 | -0.12748 |
| C | -9.48763  | -0.20069 | -0.21989 | C | 6.51046   | -0.31359 | -1.26848 |
| C | 9.08165   | -1.58257 | 1.96278  | N | 7.49671   | -0.49028 | -2.16323 |
| C | 9.07801   | -2.13823 | 0.55517  | C | 7.30524   | 0.22399  | -3.41709 |
| O | 9.53788   | -1.53218 | -0.41527 | C | 5.80730   | 0.61384  | -3.37013 |
| N | 8.53084   | -3.38681 | 0.46072  | C | 5.43818   | 0.60530  | -1.87074 |
| C | 8.09990   | -3.94020 | -0.80812 | C | 4.00231   | 0.22211  | -1.41712 |
| C | 6.58761   | -3.75580 | -0.94463 | C | 3.03522   | -0.26082 | -2.49701 |
| O | 5.86125   | -3.79357 | -0.06479 | N | 2.56667   | 0.83452  | -3.34148 |
| C | 8.41013   | -5.44283 | -0.89862 | C | 1.84575   | -1.07784 | -1.93523 |
| N | 6.11285   | -3.66664 | -2.18867 | O | 2.14589   | -2.07888 | -1.18174 |
| C | 4.68549   | -3.73639 | -2.46052 | H | -5.11552  | -5.90609 | -5.60209 |
| C | 4.12766   | -5.00378 | -1.75315 | H | -1.62000  | -6.60291 | -2.69936 |
| O | 4.72779   | -6.07075 | -1.81055 | H | -1.01380  | -8.17471 | -0.80482 |
| C | 4.43143   | -3.82977 | -3.97669 | H | -2.51223  | -7.72315 | 0.02526  |
| C | 5.21647   | -2.80991 | -4.79657 | H | -1.23570  | -6.51406 | -0.25406 |
| O | 6.45486   | -2.79594 | -4.77616 | H | -2.28659  | -8.83434 | -2.82886 |
| N | 4.50046   | -1.96209 | -5.56888 | H | -4.30278  | -6.44029 | -1.28881 |
| N | 2.97110   | -4.78477 | -1.08579 | H | -4.13071  | -6.68615 | -3.78864 |
| C | 2.45345   | -5.69471 | -0.08570 | H | -2.62642  | -1.63136 | -0.28779 |
| C | 2.50003   | -5.12358 | 1.34118  | H | -3.36701  | -1.41352 | 1.27911  |
| O | 1.76638   | -5.59027 | 2.21220  | H | -4.71418  | -2.66083 | -1.15419 |
| N | 3.38070   | -4.11262 | 1.55034  | H | -5.81392  | -0.64471 | -1.58954 |
| C | 3.51349   | -3.41865 | 2.81864  | H | -5.37194  | 0.11469  | -0.06335 |
| C | 2.63829   | -2.14518 | 2.93081  | H | -4.15296  | -0.14020 | -1.30983 |
| O | 2.66614   | -1.48856 | 3.96398  | H | -6.85497  | -2.37957 | 0.06444  |
| C | 4.98118   | -3.04510 | 3.10055  | H | -5.78656  | -3.47808 | 0.95186  |
| O | 5.47417   | -2.03991 | 2.22826  | H | -5.98923  | -1.81755 | 1.50042  |
| C | 0.97942   | -0.51837 | 1.79513  | H | -1.77512  | -3.45947 | 0.80125  |
| C | 0.12274   | -0.45796 | 3.05173  | H | -4.06018  | -5.10853 | 0.39204  |
| O | -0.36368  | -1.49063 | 3.56369  | H | -2.05222  | -3.74748 | 6.52893  |
| C | 0.02954   | -0.43092 | 0.56644  | H | -1.24086  | -2.53770 | 5.51030  |
| S | 0.67817   | 0.42918  | -0.91936 | H | 0.73104   | -4.96050 | 3.74929  |
| N | -0.11797  | 0.75718  | 3.55399  | H | 0.30060   | -3.30506 | 4.00348  |
| C | -0.88831  | 0.99014  | 4.76938  | H | -3.51767  | -4.37654 | 4.67859  |
| C | 0.04879   | 1.00056  | 5.96904  | H | -1.90844  | -2.54929 | 3.04277  |
| O | 0.27365   | 2.03023  | 6.62137  | H | -5.35874  | 1.98494  | 5.19263  |
| N | 0.64829   | -0.17937 | 6.20763  | H | -2.02660  | 2.31362  | 0.97598  |
| C | 1.76222   | -0.28406 | 7.11998  | H | -3.16030  | 1.18001  | 0.21326  |
| C | 0.72290   | 5.38717  | 6.91079  | H | -2.57703  | 1.49773  | 3.18369  |
| C | 1.14015   | 5.36218  | 5.43710  | H | -2.50691  | -0.02501 | 2.31230  |
| O | 1.27806   | 6.39108  | 4.77095  | H | -5.00120  | 0.08432  | 2.00239  |
| N | 1.42119   | 4.12092  | 4.94978  | H | -4.70397  | 0.50822  | 3.69042  |
| C | 2.23668   | 3.88776  | 3.77068  | H | -3.72281  | 3.70599  | 1.77902  |
| C | 1.42138   | 3.72597  | 2.47076  | H | -4.19058  | 6.33352  | -3.18399 |
| O | 0.29496   | 3.21226  | 2.45806  | H | -3.31620  | 6.38504  | -1.62973 |
| C | 3.08788   | 2.62432  | 4.03413  | H | -2.87812  | 5.17967  | -2.85203 |
| C | 4.02639   | 2.23258  | 2.93359  | H | -5.58561  | 5.32410  | -1.40293 |
| N | 4.65478   | 3.14456  | 2.09816  | H | -3.24619  | 4.36728  | -0.36019 |
| C | 4.46990   | 0.96165  | 2.65391  | H | -3.86048  | 1.88319  | -5.49271 |
| C | 5.46852   | 2.41759  | 1.34077  | H | -4.87089  | 0.43907  | -5.68028 |
| N | 5.39149   | 1.09793  | 1.64654  | H | -1.81576  | 1.75113  | -3.48516 |
| N | 2.04090   | 4.15965  | 1.34442  | H | -2.36104  | -2.36003 | -2.59247 |
| C | 1.40324   | 4.01827  | 0.04277  | H | -6.07463  | 2.44697  | -4.78097 |
| C | 2.32364   | 3.78538  | -1.15847 | H | -4.41478  | 2.23651  | -2.34436 |
| O | 1.78789   | 3.43318  | -2.22061 | H | -7.81113  | 1.09483  | -0.12270 |
| C | 0.52956   | 5.27578  | -0.31887 | H | -9.71658  | 0.21900  | 1.20502  |
| C | -0.41986  | 5.67801  | 0.76428  | H | -10.42008 | -0.51421 | -0.25496 |
| N | -1.76808  | 5.34635  | 0.76838  | H | -8.87551  | -1.09610 | 0.36717  |
| C | -0.10059  | 6.32859  | 1.93274  | H | -9.76679  | 2.55598  | 0.22658  |
| C | -2.24162  | 5.78588  | 1.92567  | H | -10.53450 | 1.94146  | -1.24739 |
| N | -1.26453  | 6.38188  | 2.65942  | H | -9.04740  | 2.90075  | -1.34284 |
| N | 3.64728   | 4.08516  | -1.11539 | H | -7.84639  | -0.70547 | -1.85415 |

|   |           |          |          |                |          |          |          |
|---|-----------|----------|----------|----------------|----------|----------|----------|
| H | -7.09306  | 1.99195  | -2.10757 | H              | 5.22708  | -0.13237 | -3.91096 |
| H | 9.65230   | -0.65468 | 1.98386  | H              | 7.95486  | 1.10981  | -3.46124 |
| H | 8.04676   | -5.85413 | -1.84378 | H              | 8.37212  | -0.90977 | -1.84613 |
| H | 7.90540   | -5.97990 | -0.08981 | H              | 8.04411  | -1.38548 | 2.25815  |
| H | 8.62724   | -3.39467 | -1.59380 | H              | 9.51130  | -2.29726 | 2.67160  |
| H | 7.97107   | -3.68989 | 1.24834  | H              | 0.09328  | 6.26013  | 7.08961  |
| H | 3.35558   | -3.74809 | -4.15259 | H              | 0.20804  | 4.47078  | 7.20906  |
| H | 4.75889   | -4.81980 | -4.31328 | H              | -6.75398 | 3.07777  | 5.05525  |
| H | 5.03794   | -1.28074 | -6.08697 | H              | -6.78285 | 1.47213  | 4.27535  |
| H | 3.52024   | -1.72955 | -5.40617 | H              | -6.30300 | -4.67212 | -5.10801 |
| H | 4.19110   | -2.85304 | -2.04652 | H              | -4.80513 | -4.17603 | -5.89165 |
| H | 6.72837   | -3.55425 | -2.99079 | H              | 0.31721  | 1.56124  | -5.37627 |
| H | 3.04278   | -6.61501 | -0.12440 | H              | 1.42371  | 2.72562  | -4.60330 |
| H | 1.40408   | -5.92714 | -0.27070 | H              | 2.63669  | -0.66980 | 6.58674  |
| H | 2.57457   | -3.84619 | -1.12839 | H              | 1.97727  | 0.70736  | 7.51823  |
| H | 5.58934   | -3.95853 | 3.05348  | H              | 8.39024  | 5.49998  | -3.59926 |
| H | 5.03072   | -2.63695 | 4.11314  | H              | 8.44487  | 4.69473  | -2.01067 |
| H | 5.69452   | -2.43635 | 1.36494  | H              | 9.48727  | -5.60726 | -0.81693 |
| H | 3.16470   | -4.09255 | 3.61049  | H              | -4.32623 | -1.62515 | -3.96894 |
| H | 4.01081   | -3.85902 | 0.79526  | H              | -0.90121 | -0.19032 | -2.18856 |
| H | -1.66202  | 0.22411  | 4.87702  | O              | 0.14185  | -3.66071 | -0.27803 |
| H | -1.33812  | 1.98063  | 4.70836  | H              | 0.80626  | -3.04004 | -0.66061 |
| H | 0.20595   | 1.60076  | 3.07308  | H              | -0.51320 | -3.81922 | -0.97918 |
| H | 1.53206   | -0.95612 | 7.95393  | C              | 1.78195  | -1.81698 | 1.74808  |
| H | 0.49451   | -0.93279 | 5.54775  | H              | 1.10327  | -2.66805 | 1.61356  |
| H | 1.62898   | 5.48663  | 7.51767  | H              | 2.39321  | -1.83009 | 0.84032  |
| H | 2.42508   | 1.77678  | 4.24659  |                |          |          |          |
| H | 3.64566   | 2.82036  | 4.95874  | <b>Reac-N2</b> |          |          |          |
| H | 4.24177   | 0.00586  | 3.08951  | C              | -5.53408 | -4.66007 | -4.94154 |
| H | 5.84330   | 0.32181  | 1.15086  | C              | -5.00208 | -4.58727 | -3.51997 |
| H | 6.11981   | 2.81663  | 0.57794  | O              | -4.91395 | -3.50569 | -2.93481 |
| H | 2.89734   | 4.75067  | 3.64689  | N              | -4.64038 | -5.76918 | -2.95959 |
| H | 1.15948   | 3.32285  | 5.52580  | C              | -4.27393 | -5.99230 | -1.56784 |
| H | -0.01400  | 5.04345  | -1.23729 | C              | -3.41820 | -4.86597 | -0.97377 |
| H | 1.21140   | 6.10674  | -0.53796 | O              | -2.40287 | -4.47368 | -1.56816 |
| H | 0.82893   | 6.68074  | 2.34832  | C              | -3.45546 | -7.29850 | -1.49592 |
| H | -1.32974  | 6.73606  | 3.60237  | O              | -4.27048 | -8.28088 | -2.14735 |
| H | -3.26621  | 5.70671  | 2.26548  | C              | -3.11476 | -7.71098 | -0.06717 |
| H | 0.74604   | 3.14703  | 0.08505  | N              | -3.79977 | -4.46566 | 0.24512  |
| H | 3.04054   | 4.33087  | 1.44085  | C              | -3.18316 | -3.39689 | 1.01827  |
| H | 2.86441   | 5.25227  | -3.42009 | C              | -3.69665 | -3.55157 | 2.46345  |
| H | 4.45190   | 5.42402  | -4.15770 | O              | -4.65086 | -4.28926 | 2.73105  |
| H | 5.18065   | 6.93557  | -2.28497 | C              | -3.48558 | -1.99848 | 0.41583  |
| H | 3.60705   | 6.71936  | -1.50566 | C              | -4.89759 | -1.79834 | -0.16125 |
| H | 3.37552   | 10.40242 | -2.80431 | C              | -6.03045 | -1.98796 | 0.85828  |
| H | 3.21310   | 9.34541  | -1.38383 | C              | -5.01712 | -0.42515 | -0.83975 |
| H | 4.81565   | 9.60331  | -2.13351 | N              | -3.03023 | -2.81214 | 3.37347  |
| H | 4.24793   | 3.28942  | -2.95118 | C              | -3.30318 | -2.90850 | 4.80284  |
| H | 4.15345   | 4.27393  | -0.25607 | C              | -4.03933 | -1.64255 | 5.26626  |
| H | 8.75062   | 3.75463  | -3.49113 | O              | -3.53943 | -0.52207 | 5.13478  |
| H | 6.32324   | 4.12187  | -4.01781 | C              | -1.99927 | -3.08303 | 5.60705  |
| H | 1.80830   | 2.00299  | -6.19828 | C              | -1.28181 | -4.33728 | 5.09280  |
| H | 1.65628   | 0.34263  | 1.79440  | O              | -1.68119 | -5.45394 | 5.40515  |
| H | -0.85459  | 0.15180  | 0.82813  | N              | -0.23881 | -4.09963 | 4.25620  |
| H | -0.29806  | -1.43609 | 0.29397  | C              | -5.92980 | 3.13395  | 4.37561  |
| H | 7.52946   | -0.42590 | -4.26738 | C              | -5.22177 | 3.61710  | 3.11499  |
| H | 3.54406   | 1.06461  | -0.89280 | O              | -5.03734 | 4.81496  | 2.89406  |
| H | 4.08066   | -0.57662 | -0.67397 | N              | -4.78544 | 2.64963  | 2.25005  |
| H | 3.53732   | -0.97623 | -3.15455 | C              | -3.83652 | 3.04323  | 1.20318  |
| H | 2.34106   | 1.71909  | -2.88673 | C              | -4.50924 | 3.41113  | -0.12062 |
| N | -5.07371  | -2.61413 | 5.72814  | O              | -5.66932 | 3.11622  | -0.40480 |
| H | -5.61050  | -1.82428 | 6.06125  | C              | -2.84765 | 1.85425  | 1.06972  |
| C | -5.70225  | -3.93514 | 5.72914  | C              | -3.07719 | 1.09241  | 2.37847  |
| H | -6.73329  | -3.82172 | 6.06837  | C              | -4.57407 | 1.24167  | 2.61574  |
| H | -5.71056  | -4.36705 | 4.72402  | N              | -3.67422 | 4.06258  | -0.98597 |
| H | -5.19415  | -4.62634 | 6.40975  | C              | -4.22375 | 4.80162  | -2.12133 |
| H | 1.11972   | -1.25804 | -2.74860 | C              | -5.01572 | 3.95235  | -3.12400 |
| N | -9.87296  | 0.80256  | -3.87358 | O              | -5.90987 | 4.46814  | -3.78846 |
| H | -9.26770  | 1.60086  | -3.99770 | C              | -3.08440 | 5.51627  | -2.85885 |
| C | -10.99399 | 0.60409  | -4.77112 | N              | -4.62449 | 2.65609  | -3.29161 |
| H | -11.51314 | -0.30074 | -4.45303 | C              | -5.25781 | 1.79461  | -4.27474 |
| H | -11.68777 | 1.45058  | -4.72659 | C              | -6.36364 | 0.88213  | -3.69728 |
| H | -10.65830 | 0.47733  | -5.80680 | O              | -6.53563 | -0.26029 | -4.12258 |
| H | 5.62573   | 1.57888  | -3.84830 | C              | -4.22533 | 0.98492  | -5.08232 |
| H | 5.67083   | 1.59200  | -1.44883 | C              | -3.27841 | 0.17379  | -4.25807 |

|   |           |          |          |   |           |          |          |
|---|-----------|----------|----------|---|-----------|----------|----------|
| N | -3.53081  | -1.10020 | -3.78682 | C | 4.45687   | 5.17200  | -3.20656 |
| C | -2.01385  | 0.47152  | -3.80206 | C | 4.85944   | 6.45195  | -2.47337 |
| C | -2.44306  | -1.51277 | -3.08346 | S | 4.33469   | 7.91876  | -3.44021 |
| N | -1.49706  | -0.58128 | -3.07204 | C | 4.86553   | 9.22428  | -2.27747 |
| N | -7.17119  | 1.46877  | -2.77429 | N | 7.11241   | 3.79404  | -3.21674 |
| C | -8.24177  | 0.72061  | -2.11282 | C | 8.57532   | 3.81698  | -3.17427 |
| C | -9.51254  | 0.55091  | -2.97252 | C | 1.63909   | 1.84224  | -5.37416 |
| O | -10.30886 | -0.34453 | -2.70450 | C | 2.27244   | 0.62223  | -4.73789 |
| C | -8.54441  | 1.37665  | -0.73774 | O | 2.35198   | -0.45454 | -5.34213 |
| C | -9.13243  | 2.78931  | -0.87952 | O | 6.22135   | -1.42340 | -0.11529 |
| C | -9.44135  | 0.48711  | 0.13116  | C | 6.40914   | -0.85695 | -1.19892 |
| C | 8.96193   | -2.11444 | 2.17539  | N | 7.45031   | -1.07619 | -2.01865 |
| C | 8.82632   | -2.74132 | 0.80167  | C | 7.46112   | -0.23573 | -3.20714 |
| O | 9.35840   | -2.26890 | -0.20693 | C | 6.01607   | 0.31723  | -3.25759 |
| N | 8.10068   | -3.89605 | 0.78567  | C | 5.51947   | 0.24247  | -1.79695 |
| C | 7.71716   | -4.55286 | -0.44939 | C | 4.01453   | 0.03339  | -1.47946 |
| C | 6.22934   | -4.33797 | -0.70763 | C | 3.12702   | -0.35712 | -2.66567 |
| O | 5.41696   | -4.38175 | 0.23430  | N | 2.73209   | 0.78892  | -3.46907 |
| C | 7.97280   | -6.06739 | -0.37940 | C | 1.90909   | -1.19124 | -2.29182 |
| N | 5.84955   | -4.21608 | -1.98240 | O | 1.98526   | -2.12222 | -1.50122 |
| C | 4.43883   | -4.16557 | -2.30777 | H | -5.57478  | -5.67170 | -5.35268 |
| C | 3.73949   | -5.44449 | -1.76154 | H | -2.53331  | -7.12286 | -2.06976 |
| O | 4.35205   | -6.48903 | -1.68127 | H | -2.59384  | -8.67401 | -0.07249 |
| C | 4.21930   | -4.10507 | -3.83802 | H | -4.02417  | -7.82017 | 0.53131  |
| C | 5.13959   | -3.13565 | -4.58354 | H | -2.45873  | -6.98416 | 0.41928  |
| O | 6.36862   | -3.20092 | -4.46225 | H | -3.76077  | -9.09821 | -2.21466 |
| N | 4.54915   | -2.26641 | -5.43394 | H | -5.18438  | -6.12707 | -0.96740 |
| C | 1.85516   | -6.07895 | -0.12656 | H | -4.80684  | -6.62715 | -3.46796 |
| C | 1.81704   | -5.28148 | 1.17766  | H | -2.75975  | -1.82930 | -0.38355 |
| O | 1.00093   | -5.58784 | 2.04526  | H | -3.28192  | -1.25040 | 1.18394  |
| N | 2.72633   | -4.27335 | 1.34006  | H | -5.02756  | -2.54572 | -0.94592 |
| C | 2.88775   | -3.59775 | 2.62230  | H | -5.84119  | -0.44690 | -1.55053 |
| C | 2.20755   | -2.22248 | 2.71406  | H | -5.21496  | 0.38423  | -0.13270 |
| O | 2.33910   | -1.53622 | 3.73664  | H | -4.11362  | -0.16767 | -1.41014 |
| C | 4.36774   | -3.44866 | 3.03039  | H | -6.99281  | -1.74193 | 0.39762  |
| O | 5.08736   | -2.49446 | 2.26713  | H | -6.08963  | -3.01079 | 1.23461  |
| N | 1.48035   | -1.81770 | 1.65326  | H | -5.90363  | -1.33292 | 1.72785  |
| C | 0.81364   | -0.52557 | 1.66496  | H | -2.09736  | -3.53824 | 1.03440  |
| C | -0.00758  | -0.35235 | 2.94967  | H | -4.61436  | -4.87073 | 0.69585  |
| O | -0.62736  | -1.30303 | 3.45591  | H | -2.25905  | -3.24944 | 6.65601  |
| C | -0.15040  | -0.38510 | 0.46460  | H | -1.39709  | -2.17729 | 5.52566  |
| S | 0.42064   | 0.87044  | -0.74894 | H | 0.12396   | -4.86353 | 3.69318  |
| N | -0.05436  | 0.89155  | 3.42761  | H | -0.10782  | -3.16337 | 3.89180  |
| C | -0.76044  | 1.27344  | 4.63975  | H | -3.90469  | -3.80553 | 4.94082  |
| C | 0.18047   | 1.28648  | 5.83564  | H | -2.21564  | -2.26351 | 3.10650  |
| O | 0.37491   | 2.30521  | 6.51372  | H | -5.21287  | 2.67952  | 5.06844  |
| N | 0.78185   | 0.11238  | 6.10289  | H | -1.82376  | 2.21527  | 0.94760  |
| C | 1.73983   | 0.03751  | 7.18212  | H | -3.09292  | 1.23409  | 0.20376  |
| C | 1.15905   | 5.75408  | 6.66204  | H | -2.57427  | 1.61767  | 3.18482  |
| C | 1.70621   | 5.57824  | 5.24654  | H | -2.73138  | 0.06118  | 2.39817  |
| O | 2.04643   | 6.53220  | 4.54402  | H | -5.16190  | 0.59312  | 1.96051  |
| N | 1.85586   | 4.28273  | 4.85388  | H | -4.84265  | 1.02812  | 3.64727  |
| C | 2.67082   | 3.89521  | 3.71688  | H | -3.29595  | 3.91914  | 1.55771  |
| C | 1.86432   | 3.76929  | 2.41471  | H | -3.49153  | 6.09926  | -3.68773 |
| O | 0.74252   | 3.24872  | 2.39378  | H | -2.55091  | 6.18439  | -2.17668 |
| C | 3.33592   | 2.54122  | 4.04141  | H | -2.37011  | 4.78718  | -3.25548 |
| C | 4.20690   | 1.98612  | 2.95701  | H | -4.95268  | 5.53998  | -1.76728 |
| N | 5.00411   | 2.77344  | 2.14037  | H | -2.79337  | 4.42591  | -0.60669 |
| C | 4.42117   | 0.65424  | 2.68736  | H | -3.63937  | 1.69379  | -5.67435 |
| C | 5.69519   | 1.91336  | 1.40396  | H | -4.77378  | 0.33938  | -5.77244 |
| N | 5.37713   | 0.62473  | 1.70263  | H | -1.45075  | 1.38096  | -3.96596 |
| N | 2.46868   | 4.21559  | 1.28707  | H | -2.40016  | -2.48411 | -2.61112 |
| C | 1.81360   | 4.10034  | -0.00517 | H | -5.77591  | 2.47440  | -4.96114 |
| C | 2.69731   | 3.71783  | -1.19439 | H | -3.94338  | 2.25990  | -2.65709 |
| O | 2.12407   | 3.40310  | -2.24971 | H | -7.57055  | 1.47348  | -0.24198 |
| C | 1.04724   | 5.41027  | -0.39652 | H | -9.56895  | 0.94162  | 1.11943  |
| C | 0.03225   | 5.82037  | 0.62498  | H | -10.42523 | 0.34933  | -0.32295 |
| N | -1.32116  | 5.53721  | 0.49720  | H | -9.00326  | -0.50664 | 0.26831  |
| C | 0.26420   | 6.45360  | 1.82386  | H | -9.25818  | 3.24147  | 0.10873  |
| C | -1.89053  | 5.99756  | 1.60041  | H | -10.11241 | 2.76161  | -1.36813 |
| N | -0.96682  | 6.55272  | 2.43039  | H | -8.48267  | 3.45591  | -1.45520 |
| N | 4.04969   | 3.85620  | -1.15038 | H | -7.90175  | -0.30693 | -1.95001 |
| C | 4.80469   | 3.89131  | -2.40545 | H | -6.81239  | 2.28765  | -2.29455 |
| C | 6.31544   | 3.79970  | -2.11078 | H | 9.59139   | -1.22835 | 2.10363  |
| O | 6.74942   | 3.74318  | -0.96370 | H | 7.65021   | -6.55424 | -1.30375 |

|   |           |          |          |                |          |          |          |
|---|-----------|----------|----------|----------------|----------|----------|----------|
| H | 7.40317   | -6.50511 | 0.44571  | H              | 7.96707  | -1.83287 | 2.54044  |
| H | 8.31450   | -4.10409 | -1.24585 | H              | 9.39884  | -2.82235 | 2.88615  |
| H | 7.49252   | -4.07356 | 1.57539  | H              | 0.59067  | 6.68427  | 6.71331  |
| H | 3.16556   | -3.88870 | -4.03424 | H              | 0.54144  | 4.90849  | 6.97614  |
| H | 4.44060   | -5.09306 | -4.25919 | H              | -6.38315 | 4.00087  | 4.85597  |
| H | 5.17222   | -1.64678 | -5.93349 | H              | -6.70144 | 2.39205  | 4.15209  |
| H | 3.57655   | -1.96711 | -5.38361 | H              | -6.53577 | -4.22275 | -4.94829 |
| H | 3.98224   | -3.29104 | -1.83239 | H              | -4.90254 | -4.03787 | -5.58167 |
| H | 6.51156   | -4.05822 | -2.73891 | H              | 0.58082  | 1.61948  | -5.54226 |
| H | 2.52020   | -6.93858 | 0.02103  | H              | 1.72388  | 2.73866  | -4.75612 |
| H | 0.84229   | -6.46958 | -0.23009 | H              | 1.30913  | 0.46553  | 8.08968  |
| H | 4.83626   | -4.44092 | 2.98098  | H              | 1.99758  | -1.00803 | 7.35747  |
| H | 4.38334   | -3.09689 | 4.06400  | H              | 8.96226  | 4.75976  | -3.57317 |
| H | 5.28858   | -2.87834 | 1.39637  | H              | 8.87829  | 3.71688  | -2.13178 |
| H | 2.39832   | -4.21558 | 3.38316  | H              | 9.03643  | -6.25876 | -0.21872 |
| H | 3.49816   | -4.19605 | 0.68434  | H              | -4.41212 | -1.60891 | -3.82709 |
| H | -1.58794  | 0.58172  | 4.82257  | H              | -0.40075 | 0.42274  | -1.74071 |
| H | -1.13419  | 2.29048  | 4.51989  | O              | -0.15064 | -3.48128 | -0.39255 |
| H | 0.42170   | 1.66146  | 2.94961  | H              | 0.37493  | -3.06380 | -1.09295 |
| H | 2.65663   | 0.59256  | 6.94852  | H              | -0.94794 | -3.85778 | -0.82102 |
| H | 0.74895   | -0.63874 | 5.42331  | C              | 2.26598  | -5.33864 | -1.41405 |
| H | 2.00790   | 5.83652  | 7.34882  | H              | 1.94721  | -4.30267 | -1.38208 |
| H | 2.56077   | 1.80286  | 4.27802  | H              | 1.73938  | -5.80556 | -2.25759 |
| H | 3.91451   | 2.69352  | 4.96162  |                |          |          |          |
| H | 4.00942   | -0.24344 | 3.11690  | <b>TS-1-N2</b> |          |          |          |
| H | 5.70830   | -0.22044 | 1.23348  | C              | -5.24479 | -4.99620 | -4.99432 |
| H | 6.42867   | 2.18927  | 0.66194  | C              | -4.62637 | -4.80116 | -3.61835 |
| H | 3.44179   | 4.65876  | 3.58243  | O              | -4.61247 | -3.68892 | -3.08453 |
| H | 1.45296   | 3.55285  | 5.43774  | N              | -4.11824 | -5.92267 | -3.04783 |
| H | 0.55600   | 5.22947  | -1.35508 | C              | -3.56376 | -6.09170 | -1.71002 |
| H | 1.78358   | 6.21056  | -0.54170 | C              | -2.97622 | -4.81848 | -1.10367 |
| H | 1.16490   | 6.77302  | 2.32536  | O              | -2.07972 | -4.20146 | -1.70344 |
| H | -1.13877  | 6.94586  | 3.34320  | C              | -2.42045 | -7.12716 | -1.79318 |
| H | -2.94412  | 5.95096  | 1.84719  | O              | -3.03653 | -8.29472 | -2.34834 |
| H | 1.06890   | 3.30986  | 0.08956  | C              | -1.76329 | -7.40859 | -0.44430 |
| H | 3.41479   | 4.56079  | 1.37683  | N              | -3.39359 | -4.54544 | 0.13561  |
| H | 3.37999   | 5.16181  | -3.39021 | C              | -2.91789 | -3.44353 | 0.96136  |
| H | 4.93882   | 5.13531  | -4.19042 | C              | -3.38481 | -3.74464 | 2.39737  |
| H | 5.94416   | 6.48981  | -2.31990 | O              | -4.27308 | -4.57358 | 2.62498  |
| H | 4.37981   | 6.48342  | -1.48964 | C              | -3.41755 | -2.06129 | 0.45700  |
| H | 4.60949   | 10.18389 | -2.73138 | C              | -4.81378 | -2.02933 | -0.18574 |
| H | 4.34129   | 9.13390  | -1.32213 | C              | -5.94831 | -2.42284 | 0.77106  |
| H | 5.94560   | 9.18821  | -2.11041 | C              | -5.09795 | -0.65130 | -0.80041 |
| H | 4.51525   | 3.02429  | -3.01079 | N              | -2.75978 | -3.01739 | 3.34353  |
| H | 4.57596   | 3.88984  | -0.28143 | C              | -3.03209 | -3.18618 | 4.76565  |
| H | 8.98780   | 2.98429  | -3.75126 | C              | -3.87904 | -2.00326 | 5.25695  |
| H | 6.67136   | 3.88454  | -4.11963 | O              | -3.47916 | -0.84050 | 5.14857  |
| H | 2.09461   | 2.01124  | -6.35302 | C              | -1.72360 | -3.26414 | 5.57472  |
| H | 1.58054   | 0.25889  | 1.64939  | C              | -0.90550 | -4.45714 | 5.06364  |
| H | -1.13515  | -0.07976 | 0.81099  | O              | -1.23313 | -5.60213 | 5.35896  |
| H | -0.27213  | -1.34553 | -0.03382 | N              | 0.13914  | -4.13690 | 4.26064  |
| H | 7.70399   | -0.82990 | -4.09197 | C              | -6.12224 | 2.61162  | 4.44303  |
| H | 3.59720   | 0.93396  | -1.02194 | C              | -5.50402 | 3.18284  | 3.17164  |
| H | 3.93472   | -0.74950 | -0.71895 | O              | -5.49079 | 4.39228  | 2.94211  |
| H | 3.68178   | -1.03726 | -3.32094 | N              | -4.94471 | 2.28330  | 2.30166  |
| H | 2.50053   | 1.65546  | -2.98192 | C              | -4.08108 | 2.81564  | 1.24155  |
| N | -5.25243  | -1.81218 | 5.84661  | C              | -4.83377 | 3.18309  | -0.03700 |
| H | -5.68369  | -0.94732 | 6.14491  | O              | -5.97524 | 2.80463  | -0.29907 |
| C | -6.04954  | -3.03833 | 5.88724  | C              | -2.98481 | 1.74133  | 1.02103  |
| H | -7.07263  | -2.77121 | 6.15780  | C              | -3.03271 | 0.97408  | 2.34398  |
| H | -6.06553  | -3.53037 | 4.91044  | C              | -4.51971 | 0.92484  | 2.67164  |
| H | -5.67267  | -3.74468 | 6.63483  | N              | -4.08925 | 3.94344  | -0.89640 |
| H | 1.26636   | -2.48367 | 0.92004  | C              | -4.73806 | 4.68840  | -1.97372 |
| H | 0.99056   | -1.00899 | -2.87378 | C              | -5.41083 | 3.82508  | -3.04977 |
| N | -9.70644  | 1.45570  | -3.97086 | O              | -6.26742 | 4.31378  | -3.77889 |
| H | -8.97632  | 2.13610  | -4.12675 | C              | -3.71275 | 5.60962  | -2.64605 |
| C | -10.85400 | 1.41445  | -4.85443 | N              | -4.96095 | 2.54360  | -3.18446 |
| H | -11.39461 | 2.36713  | -4.84082 | C              | -5.50473 | 1.63976  | -4.17878 |
| H | -10.55706 | 1.19309  | -5.88633 | C              | -6.51863 | 0.62038  | -3.61276 |
| H | -11.51444 | 0.62275  | -4.49843 | O              | -6.59488 | -0.51914 | -4.07188 |
| H | 5.98829   | 1.32733  | -3.66808 | C              | -4.39351 | 0.92847  | -4.97728 |
| H | 5.84105   | 1.15316  | -1.27761 | C              | -3.39368 | 0.22314  | -4.11904 |
| H | 5.41364   | -0.32064 | -3.90443 | N              | -3.48133 | -1.10077 | -3.72487 |
| H | 8.19975   | 0.57122  | -3.10438 | C              | -2.24750 | 0.69748  | -3.52692 |
| H | 8.25536   | -1.59261 | -1.65928 | C              | -2.42313 | -1.39232 | -2.93679 |

|   |           |          |          |   |           |          |          |
|---|-----------|----------|----------|---|-----------|----------|----------|
| N | -1.65460  | -0.31465 | -2.80070 | C | 3.93749   | 9.44446  | -2.32631 |
| N | -7.35595  | 1.10434  | -2.65763 | N | 6.77523   | 4.24448  | -3.25954 |
| C | -8.34209  | 0.23724  | -2.00726 | C | 8.22237   | 4.46592  | -3.21591 |
| C | -9.56409  | -0.08842 | -2.88942 | C | 1.25662   | 1.58871  | -5.25285 |
| O | -10.25020 | -1.07357 | -2.63241 | C | 2.02446   | 0.44979  | -4.61279 |
| C | -8.74571  | 0.86173  | -0.64398 | O | 2.12346   | -0.65245 | -5.17075 |
| C | -9.51944  | 2.17849  | -0.81154 | O | 6.38611   | -0.96256 | -0.13298 |
| C | -9.52161  | -0.13412 | 0.22604  | C | 6.45974   | -0.42393 | -1.24398 |
| C | 9.09232   | -1.49830 | 2.03970  | N | 7.47094   | -0.57706 | -2.11455 |
| C | 9.04345   | -2.13560 | 0.66765  | C | 7.34217   | 0.21890  | -3.32644 |
| O | 9.50677   | -1.60146 | -0.34328 | C | 5.85284   | 0.64332  | -3.31012 |
| N | 8.46583   | -3.37244 | 0.65569  | C | 5.43668   | 0.56220  | -1.82460 |
| C | 8.08654   | -4.03026 | -0.57890 | C | 3.97836   | 0.21114  | -1.42748 |
| C | 6.57888   | -3.90645 | -0.77754 | C | 3.08614   | -0.33932 | -2.54092 |
| O | 5.80734   | -3.98818 | 0.19570  | N | 2.56798   | 0.71708  | -3.39902 |
| C | 8.44145   | -5.52563 | -0.55013 | C | 1.96218   | -1.25154 | -2.04848 |
| N | 6.14498   | -3.82094 | -2.03779 | O | 2.18048   | -2.12365 | -1.19344 |
| C | 4.72701   | -3.91320 | -2.31459 | H | -5.18481  | -6.02000 | -5.37128 |
| C | 4.18293   | -5.25169 | -1.73771 | H | -1.67724  | -6.71310 | -2.49040 |
| O | 4.90576   | -6.22455 | -1.66746 | H | -1.04079  | -8.22498 | -0.54924 |
| C | 4.45220   | -3.89065 | -3.83705 | H | -2.50496  | -7.70827 | 0.30194  |
| C | 5.26541   | -2.85912 | -4.62341 | H | -1.21919  | -6.53487 | -0.07334 |
| O | 6.50044   | -2.83471 | -4.55616 | H | -2.34901  | -8.95447 | -2.50466 |
| N | 4.57263   | -2.03992 | -5.44399 | H | -4.33849  | -6.50364 | -1.04926 |
| C | 2.45594   | -6.00127 | 0.00883  | H | -4.18860  | -6.79698 | -3.55068 |
| C | 2.37706   | -5.16094 | 1.28469  | H | -2.69229  | -1.69990 | -0.27609 |
| O | 1.67029   | -5.55936 | 2.20714  | H | -3.37773  | -1.36859 | 1.29844  |
| N | 3.13715   | -4.02337 | 1.37360  | H | -4.80756  | -2.74531 | -1.01119 |
| C | 3.27473   | -3.32740 | 2.65025  | H | -5.89780  | -0.74601 | -1.53123 |
| C | 2.47532   | -2.01797 | 2.77216  | H | -5.40772  | 0.09178  | -0.06061 |
| O | 2.47594   | -1.39948 | 3.84595  | H | -4.22658  | -0.25093 | -1.32765 |
| C | 4.74465   | -3.06168 | 3.02588  | H | -6.91353  | -2.35178 | 0.25860  |
| O | 5.37385   | -2.07288 | 2.22726  | H | -5.84062  | -3.43989 | 1.15241  |
| N | 1.79183   | -1.61686 | 1.68556  | H | -5.98536  | -1.75343 | 1.63917  |
| C | 0.94351   | -0.43580 | 1.67342  | H | -1.82266  | -3.44360 | 0.95562  |
| C | 0.09936   | -0.36844 | 2.95037  | H | -4.10958  | -5.10803 | 0.58633  |
| O | -0.43900  | -1.38110 | 3.43010  | H | -1.97524  | -3.45595 | 6.62144  |
| C | -0.04568  | -0.47981 | 0.48246  | H | -1.19372  | -2.31338 | 5.50394  |
| S | 0.46014   | 0.56580  | -0.93512 | H | 0.59201   | -4.86988 | 3.72221  |
| N | -0.07783  | 0.85680  | 3.44769  | H | 0.21349   | -3.19317 | 3.90024  |
| C | -0.83282  | 1.14125  | 4.65841  | H | -3.55124  | -4.13746 | 4.87205  |
| C | 0.10030   | 1.19246  | 5.85805  | H | -1.99105  | -2.39509 | 3.10144  |
| O | 0.24261   | 2.21462  | 6.54433  | H | -5.33969  | 2.28462  | 5.13661  |
| N | 0.77297   | 0.05403  | 6.10420  | H | -2.01638  | 2.20824  | 0.82561  |
| C | 1.77949   | 0.04538  | 7.13838  | H | -3.23018  | 1.09081  | 0.17788  |
| C | 0.77702   | 5.71093  | 6.70998  | H | -2.55197  | 1.58047  | 3.10625  |
| C | 1.25210   | 5.58810  | 5.26115  | H | -2.55201  | -0.00183 | 2.34621  |
| O | 1.46059   | 6.57210  | 4.54838  | H | -5.04775  | 0.18301  | 2.06393  |
| N | 1.50074   | 4.31284  | 4.85003  | H | -4.69665  | 0.69682  | 3.71985  |
| C | 2.31655   | 4.00234  | 3.68955  | H | -3.61309  | 3.72426  | 1.61892  |
| C | 1.50015   | 3.81872  | 2.39552  | H | -4.20208  | 6.18760  | -3.43221 |
| O | 0.37288   | 3.30862  | 2.39983  | H | -3.27407  | 6.29192  | -1.91287 |
| C | 3.11393   | 2.71677  | 4.00184  | H | -2.90370  | 5.02054  | -3.09113 |
| C | 4.03158   | 2.24677  | 2.91515  | H | -5.55868  | 5.28947  | -1.56429 |
| N | 4.72004   | 3.10218  | 2.06711  | H | -3.21184  | 4.33857  | -0.53804 |
| C | 4.40215   | 0.94523  | 2.67215  | H | -3.86910  | 1.68499  | -5.56729 |
| C | 5.50079   | 2.31255  | 1.33975  | H | -4.86562  | 0.22383  | -5.66475 |
| N | 5.34304   | 1.00505  | 1.67433  | H | -1.81715  | 1.68723  | -3.57225 |
| N | 2.11501   | 4.21661  | 1.25377  | H | -2.26612  | -2.36613 | -2.49160 |
| C | 1.47400   | 4.03204  | -0.04174 | H | -6.07383  | 2.27515  | -4.86719 |
| C | 2.39251   | 3.74050  | -1.23193 | H | -4.31953  | 2.18407  | -2.49076 |
| O | 1.85716   | 3.36301  | -2.28579 | H | -7.80011  | 1.09485  | -0.13846 |
| C | 0.61534   | 5.28316  | -0.45280 | H | -9.73925  | 0.31511  | 1.20081  |
| C | -0.36953  | 5.70669  | 0.59104  | H | -10.46266 | -0.42567 | -0.24588 |
| N | -1.71686  | 5.37448  | 0.54656  | H | -8.94182  | -1.04709 | 0.39558  |
| C | -0.10010  | 6.39528  | 1.75067  | H | -9.70755  | 2.62893  | 0.16750  |
| C | -2.24199  | 5.85306  | 1.66445  | H | -10.48564 | 2.00922  | -1.29897 |
| N | -1.29733  | 6.47256  | 2.42145  | H | -8.96461  | 2.91362  | -1.40330 |
| N | 3.72130   | 4.02869  | -1.19684 | H | -7.88884  | -0.74246 | -1.82784 |
| C | 4.46451   | 4.13829  | -2.45308 | H | -7.05042  | 1.92473  | -2.14247 |
| C | 5.97562   | 4.21523  | -2.15613 | H | 9.63752   | -0.55701 | 1.98050  |
| O | 6.40601   | 4.26485  | -1.00693 | H | 8.11520   | -6.01541 | -1.47140 |
| C | 3.98629   | 5.37300  | -3.25978 | H | 7.93254   | -6.01533 | 0.28547  |
| C | 4.24289   | 6.68954  | -2.52560 | H | 8.62346   | -3.52747 | -1.38622 |
| S | 3.55881   | 8.08947  | -3.49207 | H | 7.89773   | -3.61926 | 1.45674  |

|   |           |          |          |               |          |          |          |
|---|-----------|----------|----------|---------------|----------|----------|----------|
| H | 3.37863   | -3.76293 | -4.00059 | H             | 0.24801  | 4.81644  | 7.04954  |
| H | 4.74113   | -4.86204 | -4.25569 | H             | -6.70338 | 3.40319  | 4.91576  |
| H | 5.12422   | -1.37809 | -5.97256 | H             | -6.76780 | 1.75394  | 4.23442  |
| H | 3.57891   | -1.82472 | -5.34341 | H             | -6.29311 | -4.69135 | -4.93858 |
| H | 4.19938   | -3.08752 | -1.82631 | H             | -4.74737 | -4.32468 | -5.69927 |
| H | 6.76833   | -3.64588 | -2.82254 | H             | 0.19768  | 1.31061  | -5.26436 |
| H | 3.22299   | -6.76954 | 0.16578  | H             | 1.36901  | 2.53349  | -4.71670 |
| H | 1.49400   | -6.51310 | -0.02467 | H             | 1.34977  | 0.38808  | 8.08225  |
| H | 5.28720   | -4.01587 | 2.98690  | H             | 2.15763  | -0.97094 | 7.25665  |
| H | 4.75372   | -2.68829 | 4.05253  | H             | 8.48148  | 5.43796  | -3.64707 |
| H | 5.59924   | -2.45913 | 1.36357  | H             | 8.52937  | 4.44307  | -2.17014 |
| H | 2.85295   | -3.98125 | 3.42093  | H             | 9.52045  | -5.65024 | -0.43184 |
| H | 3.88067   | -3.88681 | 0.69480  | H             | -4.26519 | -1.73971 | -3.86227 |
| H | -1.60800  | 0.38371  | 4.80661  | H             | -0.64726 | 0.03956  | -1.92046 |
| H | -1.27961  | 2.13063  | 4.56438  | O             | 0.14669  | -3.77118 | -0.18993 |
| H | 0.28829   | 1.68181  | 2.96678  | H             | 0.79046  | -3.22206 | -0.67119 |
| H | 2.61823   | 0.70712  | 6.88986  | H             | -0.58987 | -3.91166 | -0.81531 |
| H | 0.79078   | -0.68199 | 5.40754  | C             | 2.71993  | -5.30429 | -1.34122 |
| H | 1.65723   | 5.85446  | 7.34530  | H             | 2.26929  | -4.31779 | -1.37453 |
| H | 2.41899   | 1.90432  | 4.24496  | H             | 2.23444  | -5.90295 | -2.12356 |
| H | 3.68209   | 2.92422  | 4.91772  |               |          |          |          |
| H | 4.10464   | 0.01795  | 3.13008  | <b>Int-N2</b> |          |          |          |
| H | 5.76248   | 0.19387  | 1.21446  | C             | -5.17505 | -5.15402 | -4.99002 |
| H | 6.18542   | 2.65644  | 0.57955  | C             | -4.50354 | -4.88111 | -3.65361 |
| H | 3.01122   | 4.83367  | 3.53981  | O             | -4.54284 | -3.75320 | -3.15108 |
| H | 1.19264   | 3.54910  | 5.44831  | N             | -3.89843 | -5.95214 | -3.08488 |
| H | 0.09550   | 5.03145  | -1.37974 | C             | -3.27100 | -6.07118 | -1.77270 |
| H | 1.30421   | 6.10903  | -0.66974 | C             | -2.80256 | -4.75278 | -1.16516 |
| H | 0.81199   | 6.76059  | 2.19476  | O             | -1.97435 | -4.04722 | -1.76992 |
| H | -1.41993  | 6.87590  | 3.33801  | C             | -2.02524 | -6.97454 | -1.91268 |
| H | -3.27974  | 5.77958  | 1.96449  | O             | -2.53662 | -8.19836 | -2.45293 |
| H | 0.80109   | 3.17563  | 0.03824  | C             | -1.28510 | -7.18380 | -0.59410 |
| H | 3.10508   | 4.42663  | 1.34011  | N             | -3.22765 | -4.52595 | 0.07796  |
| H | 2.91783   | 5.24514  | -3.44886 | C             | -2.79538 | -3.41997 | 0.92308  |
| H | 4.47803   | 5.38723  | -4.23937 | C             | -3.27867 | -3.75427 | 2.34490  |
| H | 5.31619   | 6.84846  | -2.36997 | O             | -4.15333 | -4.60594 | 2.54367  |
| H | 3.76120   | 6.66716  | -1.54262 | C             | -3.30944 | -2.04370 | 0.42155  |
| H | 3.57590   | 10.37007 | -2.77904 | C             | -4.69046 | -2.02939 | -0.25412 |
| H | 3.42537   | 9.29376  | -1.37200 | C             | -5.83736 | -2.47873 | 0.66232  |
| H | 5.01449   | 9.52968  | -2.15738 | C             | -4.99842 | -0.64266 | -0.84005 |
| H | 4.26335   | 3.24365  | -3.05311 | N             | -2.67654 | -3.03933 | 3.31354  |
| H | 4.24205   | 4.17576  | -0.33782 | C             | -2.96149 | -3.25547 | 4.72586  |
| H | 8.74580   | 3.67648  | -3.76264 | C             | -3.86630 | -2.12900 | 5.23885  |
| H | 6.33115   | 4.24456  | -4.16567 | O             | -3.54276 | -0.94274 | 5.12566  |
| H | 1.57770   | 1.69735  | -6.29141 | C             | -1.66437 | -3.29679 | 5.55391  |
| H | 1.56758   | 0.46481  | 1.62155  | C             | -0.80576 | -4.46496 | 5.05124  |
| H | -1.01750  | -0.10835 | 0.80490  | O             | -1.13022 | -5.61970 | 5.31277  |
| H | -0.18308  | -1.51771 | 0.17195  | N             | 0.26438  | -4.11249 | 4.30090  |
| H | 7.58695   | -0.38298 | -4.20562 | C             | -6.17706 | 2.39039  | 4.48576  |
| H | 3.48515   | 1.08570  | -0.99633 | C             | -5.59995 | 3.02769  | 3.22791  |
| H | 4.01562   | -0.53184 | -0.62521 | O             | -5.64244 | 4.24215  | 3.03631  |
| H | 3.67079   | -1.01629 | -3.17486 | N             | -5.00983 | 2.18065  | 2.32234  |
| H | 2.32456   | 1.60277  | -2.95466 | C             | -4.16114 | 2.78862  | 1.29287  |
| N | -5.07090  | -2.29239 | 5.83310  | C             | -4.90040 | 3.13896  | 0.00231  |
| H | -5.57786  | -1.47654 | 6.14985  | O             | -6.03110 | 2.74291  | -0.28185 |
| C | -5.75134  | -3.58736 | 5.85112  | C             | -2.98919 | 1.79417  | 1.07598  |
| H | -6.78996  | -3.42269 | 6.14326  | C             | -3.02948 | 0.97188  | 2.36564  |
| H | -5.73790  | -4.05306 | 4.86137  | C             | -4.51956 | 0.83360  | 2.65250  |
| H | -5.29887  | -4.27490 | 6.57370  | N             | -4.15174 | 3.91196  | -0.84388 |
| H | 1.86405   | -2.17220 | 0.84369  | C             | -4.79148 | 4.67492  | -1.91406 |
| H | 1.11332   | -1.34101 | -2.74190 | C             | -5.42540 | 3.84016  | -3.03464 |
| N | -9.84423  | 0.78245  | -3.89627 | O             | -6.20867 | 4.36540  | -3.81731 |
| H | -9.20666  | 1.55319  | -4.03390 | C             | -3.77049 | 5.63771  | -2.53371 |
| C | -10.96178 | 0.60215  | -4.80099 | N             | -5.03063 | 2.53482  | -3.14458 |
| H | -11.62447 | 1.47440  | -4.78697 | C             | -5.58244 | 1.65925  | -4.15820 |
| H | -10.62005 | 0.43596  | -5.82921 | C             | -6.55573 | 0.59771  | -3.60202 |
| H | -11.51753 | -0.27442 | -4.46574 | O             | -6.57941 | -0.54320 | -4.06840 |
| H | 5.71749   | 1.63779  | -3.73823 | C             | -4.48214 | 0.99373  | -5.01065 |
| H | 5.68682   | 1.51508  | -1.34226 | C             | -3.48988 | 0.23223  | -4.19550 |
| H | 5.27443   | -0.05702 | -3.91205 | N             | -3.61776 | -1.10352 | -3.83936 |
| H | 8.01119   | 1.09003  | -3.29115 | C             | -2.33126 | 0.66124  | -3.60427 |
| H | 8.33358   | -1.01446 | -1.78647 | C             | -2.58403 | -1.47446 | -3.07364 |
| H | 8.06583   | -1.31108 | 2.37714  | N             | -1.79148 | -0.41160 | -2.92439 |
| H | 9.57549   | -2.16048 | 2.76462  | N             | -7.40536 | 1.03400  | -2.63853 |
| H | 0.14097   | 6.59241  | 6.80522  | C             | -8.32777 | 0.10845  | -1.97055 |

|   |           |          |          |   |           |          |          |
|---|-----------|----------|----------|---|-----------|----------|----------|
| C | -9.52848  | -0.31666 | -2.84001 | C | 1.24846   | 1.55035  | -5.19781 |
| O | -10.12965 | -1.35157 | -2.56891 | C | 1.96238   | 0.39305  | -4.52152 |
| C | -8.76445  | 0.72110  | -0.61211 | O | 1.99677   | -0.72578 | -5.05607 |
| C | -9.63166  | 1.97669  | -0.79010 | O | 6.48186   | -0.78219 | -0.11074 |
| C | -9.46199  | -0.31619 | 0.27581  | C | 6.49308   | -0.30025 | -1.24945 |
| C | 9.11123   | -1.38940 | 2.00961  | N | 7.47902   | -0.46313 | -2.14806 |
| C | 9.08287   | -1.99830 | 0.62398  | C | 7.27563   | 0.25822  | -3.39606 |
| O | 9.55086   | -1.44160 | -0.37226 | C | 5.77250   | 0.62744  | -3.34374 |
| N | 8.51288   | -3.23868 | 0.58395  | C | 5.41236   | 0.61360  | -1.84224 |
| C | 8.11445   | -3.85987 | -0.66322 | C | 3.98267   | 0.23037  | -1.37518 |
| C | 6.60076   | -3.74245 | -0.82358 | C | 3.04131   | -0.35837 | -2.42435 |
| O | 5.85411   | -3.81469 | 0.16929  | N | 2.53869   | 0.67590  | -3.33012 |
| C | 8.48258   | -5.35240 | -0.69028 | C | 1.87130   | -1.16853 | -1.80620 |
| N | 6.13432   | -3.67485 | -2.07293 | O | 2.19782   | -2.07469 | -0.93542 |
| C | 4.71249   | -3.80841 | -2.31704 | H | -5.03134  | -6.17014 | -5.36489 |
| C | 4.21461   | -5.14668 | -1.70395 | H | -1.36180  | -6.47917 | -2.63676 |
| O | 4.95717   | -6.10634 | -1.64497 | H | -0.48428  | -7.91779 | -0.73486 |
| C | 4.40970   | -3.83097 | -3.83389 | H | -1.95705  | -7.56338 | 0.18129  |
| C | 5.19182   | -2.80931 | -4.66150 | H | -0.82137  | -6.25659 | -0.24365 |
| O | 6.42894   | -2.77759 | -4.63468 | H | -1.79145  | -8.78761 | -2.62573 |
| N | 4.46643   | -2.00699 | -5.46986 | H | -3.96930  | -6.57546 | -1.09161 |
| C | 2.56894   | -5.90812 | 0.10399  | H | -3.91877  | -6.83422 | -3.57910 |
| C | 2.52062   | -5.07248 | 1.38414  | H | -2.57153  | -1.66290 | -0.29075 |
| O | 1.88414   | -5.51187 | 2.34170  | H | -3.29911  | -1.35900 | 1.27011  |
| N | 3.22962   | -3.90630 | 1.44216  | H | -4.64899  | -2.72639 | -1.09512 |
| C | 3.37793   | -3.18634 | 2.70065  | H | -5.77148  | -0.73935 | -1.59943 |
| C | 2.55406   | -1.89148 | 2.82976  | H | -5.35417  | 0.06976  | -0.09125 |
| O | 2.48389   | -1.33317 | 3.93688  | H | -4.12127  | -0.19693 | -1.32205 |
| C | 4.84938   | -2.90121 | 3.05209  | H | -6.78914  | -2.43517 | 0.12231  |
| O | 5.45980   | -1.92353 | 2.22522  | H | -5.70104  | -3.49761 | 1.02866  |
| N | 1.92950   | -1.44609 | 1.72849  | H | -5.92377  | -1.82702 | 1.53994  |
| C | 1.01041   | -0.32269 | 1.73129  | H | -1.69962  | -3.40171 | 0.93548  |
| C | 0.13362   | -0.33197 | 2.98703  | H | -3.89246  | -5.14609 | 0.53303  |
| O | -0.38010  | -1.37841 | 3.42039  | H | -1.92626  | -3.50076 | 6.59598  |
| C | 0.04574   | -0.43273 | 0.52761  | H | -1.16162  | -2.33056 | 5.49725  |
| S | 0.62445   | 0.34108  | -1.02193 | H | 0.75944   | -4.82696 | 3.77242  |
| N | -0.11042  | 0.86937  | 3.51847  | H | 0.33834   | -3.16177 | 3.95995  |
| C | -0.88444  | 1.07627  | 4.73328  | H | -3.43724  | -4.23201 | 4.80173  |
| C | 0.05931   | 1.12325  | 5.92542  | H | -1.91071  | -2.40390 | 3.09529  |
| O | 0.22648   | 2.15032  | 6.59889  | H | -5.37405  | 2.05859  | 5.15305  |
| N | 0.72628   | -0.02085 | 6.16195  | H | -2.04779  | 2.33135  | 0.93675  |
| C | 1.78626   | -0.02240 | 7.14119  | H | -3.16391  | 1.16204  | 0.20078  |
| C | 0.66411   | 5.62285  | 6.74279  | H | -2.59740  | 1.56853  | 3.16434  |
| C | 1.07682   | 5.52930  | 5.27280  | H | -2.49726  | 0.02347  | 2.33614  |
| O | 1.19802   | 6.52574  | 4.55599  | H | -4.99292  | 0.09052  | 2.00352  |
| N | 1.37623   | 4.27059  | 4.84442  | H | -4.71158  | 0.55352  | 3.68487  |
| C | 2.19463   | 4.00234  | 3.67374  | H | -3.76690  | 3.72060  | 1.69738  |
| O | 1.38159   | 3.80440  | 2.37753  | H | -4.25296  | 6.22658  | -3.31555 |
| C | 0.25008   | 3.30211  | 2.38148  | H | -3.36582  | 6.30659  | -1.76966 |
| C | 3.04521   | 2.74874  | 3.97995  | H | -2.93678  | 5.07978  | -2.97363 |
| C | 3.98077   | 2.31503  | 2.89399  | H | -5.63224  | 5.24866  | -1.50521 |
| N | 4.61618   | 3.19225  | 2.02645  | H | -3.28667  | 4.31639  | -0.46231 |
| C | 4.41909   | 1.03238  | 2.66738  | H | -3.95315  | 1.78132  | -5.55294 |
| C | 5.43091   | 2.43252  | 1.30289  | H | -4.95673  | 0.33207  | -5.73770 |
| N | 5.34630   | 1.12588  | 1.66057  | H | -1.85385  | 1.62774  | -3.60998 |
| N | 2.00601   | 4.18662  | 1.23491  | H | -2.43790  | -2.45973 | -2.64019 |
| C | 1.36626   | 3.98959  | -0.05972 | H | -6.17296  | 2.31274  | -4.81066 |
| C | 2.28777   | 3.72793  | -1.25335 | H | -4.47119  | 2.14335  | -2.39989 |
| O | 1.75844   | 3.33812  | -2.30535 | H | -7.83394  | 1.02591  | -0.11629 |
| C | 0.48223   | 5.22627  | -0.47128 | H | -9.70601  | 0.13019  | 1.24543  |
| C | -0.46242  | 5.67222  | 0.59774  | H | -10.38247 | -0.68077 | -0.18582 |
| N | -1.80662  | 5.32690  | 0.63150  | H | -8.81713  | -1.18230 | 0.45446  |
| C | -0.13749  | 6.37632  | 1.73272  | H | -9.84172  | 2.42747  | 0.18415  |
| C | -2.27142  | 5.80971  | 1.77499  | H | -10.58806 | 1.73206  | -1.26448 |
| N | -1.29296  | 6.44774  | 2.47071  | H | -9.13732  | 2.74073  | -1.39908 |
| N | 3.60585   | 4.05306  | -1.22078 | H | -7.80444  | -0.83369 | -1.78111 |
| C | 4.35144   | 4.16285  | -2.47411 | H | -7.13450  | 1.86757  | -2.12365 |
| C | 5.85293   | 4.31061  | -2.16460 | H | 9.65458   | -0.44561 | 1.97793  |
| O | 6.26052   | 4.48066  | -1.01837 | H | 8.14270   | -5.81575 | -1.62014 |
| C | 3.84341   | 5.36580  | -3.31101 | H | 7.99415   | -5.87389 | 0.13829  |
| C | 4.04770   | 6.70383  | -2.59933 | H | 8.62907   | -3.32780 | -1.46627 |
| S | 3.31287   | 8.05941  | -3.59176 | H | 7.94192   | -3.50029 | 1.37850  |
| C | 3.65183   | 9.45050  | -2.45666 | H | 3.33180   | -3.72100 | -3.97920 |
| N | 6.66641   | 4.27772  | -3.25652 | H | 4.70683   | -4.80866 | -4.23176 |
| C | 8.09780   | 4.57938  | -3.21501 | H | 4.99568   | -1.34138 | -6.01618 |



|   |           |          |          |                 |           |          |          |
|---|-----------|----------|----------|-----------------|-----------|----------|----------|
| H | 3.47714   | -1.79450 | -5.31938 | H               | -6.24517  | -4.96090 | -4.87526 |
| H | 4.16675   | -2.99038 | -1.83474 | H               | -4.79255  | -4.44253 | -5.72650 |
| H | 6.74010   | -3.52782 | -2.87664 | H               | 0.20211   | 1.26263  | -5.33934 |
| H | 3.35733   | -6.65953 | 0.23461  | H               | 1.29536   | 2.47921  | -4.62603 |
| H | 1.61916   | -6.44243 | 0.10879  | H               | 1.41538   | 0.36661  | 8.09156  |
| H | 5.39978   | -3.85141 | 3.02501  | H               | 2.14180   | -1.04458 | 7.27729  |
| H | 4.87007   | -2.50787 | 4.07169  | H               | 8.31325   | 5.52241  | -3.72736 |
| H | 5.67026   | -2.32438 | 1.36363  | H               | 8.38773   | 4.66459  | -2.16763 |
| H | 2.97906   | -3.83759 | 3.48477  | H               | 9.56475   | -5.47046 | -0.59608 |
| H | 3.89287   | -3.70120 | 0.70281  | H               | -4.42866  | -1.70416 | -3.99380 |
| H | -1.63083  | 0.28498  | 4.84818  | H               | -0.95069  | -0.31999 | -2.29948 |
| H | -1.37063  | 2.04986  | 4.67591  | O               | 0.19141   | -3.73708 | -0.08126 |
| H | 0.21552   | 1.72334  | 3.05959  | H               | 0.91885   | -3.15200 | -0.39347 |
| H | 2.62976   | 0.60289  | 6.82349  | H               | -0.42882  | -3.78991 | -0.82805 |
| H | 0.74269   | -0.74198 | 5.44928  | C               | 2.76843   | -5.20782 | -1.25477 |
| H | 1.56819   | 5.78650  | 7.33855  | H               | 2.31760   | -4.21874 | -1.27260 |
| H | 2.38514   | 1.90797  | 4.22452  | H               | 2.25573   | -5.80990 | -2.01751 |
| H | 3.60539   | 2.97919  | 4.89532  |                 |           |          |          |
| H | 4.17206   | 0.09847  | 3.14024  |                 |           |          |          |
| H | 5.79880   | 0.33060  | 1.20051  | <b>Reac-N23</b> |           |          |          |
| H | 6.08869   | 2.79932  | 0.52964  | C               | -5.54401  | -4.46256 | -5.12022 |
| H | 2.85580   | 4.86103  | 3.52485  | C               | -5.09390  | -4.43403 | -3.66934 |
| H | 1.13710   | 3.49409  | 5.45774  | O               | -5.03456  | -3.37194 | -3.04571 |
| H | -0.06416  | 4.94970  | -1.37561 | N               | -4.76780  | -5.63407 | -3.12715 |
| H | 1.15901   | 6.04946  | -0.73132 | C               | -4.46647  | -5.88640 | -1.72664 |
| H | 0.79319   | 6.75451  | 2.12116  | C               | -3.54358  | -4.82053 | -1.11474 |
| H | -1.34706  | 6.83383  | 3.40186  | O               | -2.54337  | -4.43152 | -1.73255 |
| H | -3.29108  | 5.73381  | 2.12990  | C               | -3.75231  | -7.25222 | -1.63537 |
| H | 0.71505   | 3.11576  | 0.01448  | O               | -4.59393  | -8.16324 | -2.35423 |
| H | 3.00972   | 4.34141  | 1.32418  | C               | -3.53257  | -7.71658 | -0.19918 |
| H | 2.78218   | 5.19947  | -3.51011 | N               | -3.86912  | -4.46185 | 0.13501  |
| H | 4.35074   | 5.37641  | -4.28247 | C               | -3.21184  | -3.42858 | 0.92444  |
| H | 5.11327   | 6.90706  | -2.44376 | C               | -3.66348  | -3.63927 | 2.38180  |
| H | 3.56490   | 6.68089  | -1.61691 | O               | -4.64381  | -4.34219 | 2.65179  |
| H | 3.25802   | 10.35421 | -2.92645 | C               | -3.54117  | -2.00098 | 0.40145  |
| H | 3.14970   | 9.30308  | -1.49653 | C               | -4.95562  | -1.79365 | -0.16803 |
| H | 4.72625   | 9.57424  | -2.29528 | C               | -6.08472  | -2.02836 | 0.84627  |
| H | 4.18844   | 3.24966  | -3.05711 | C               | -5.09223  | -0.39987 | -0.79879 |
| H | 4.11766   | 4.25082  | -0.36674 | N               | -2.92832  | -2.98677 | 3.30770  |
| H | 8.67174   | 3.77428  | -3.68248 | C               | -3.21649  | -3.10178 | 4.73427  |
| H | 6.23739   | 4.16858  | -4.16338 | C               | -3.97049  | -1.84988 | 5.20963  |
| H | 1.67640   | 1.69857  | -6.19310 | O               | -3.47083  | -0.72546 | 5.11319  |
| H | 1.55981   | 0.62611  | 1.68806  | C               | -1.92767  | -3.26383 | 5.56032  |
| H | -0.87831  | 0.09667  | 0.76328  | C               | -1.17104  | -4.49925 | 5.05869  |
| H | -0.19480  | -1.48618 | 0.36893  | O               | -1.58362  | -5.62593 | 5.31065  |
| H | 7.50792   | -0.38196 | -4.25135 | N               | -0.06770  | -4.22876 | 4.31414  |
| H | 3.49700   | 1.09916  | -0.92299 | C               | -5.89459  | 2.95986  | 4.49728  |
| H | 4.07144   | -0.50577 | -0.57105 | C               | -5.19709  | 3.47603  | 3.24262  |
| H | 3.57345   | -1.09373 | -3.03418 | O               | -5.03548  | 4.68068  | 3.04068  |
| H | 2.33509   | 1.58932  | -2.92487 | N               | -4.74370  | 2.53276  | 2.36042  |
| N | -5.01845  | -2.49689 | 5.84921  | C               | -3.81632  | 2.96652  | 1.30909  |
| H | -5.56736  | -1.71752 | 6.18712  | C               | -4.51750  | 3.39417  | 0.01871  |
| C | -5.61192  | -3.83356 | 5.87908  | O               | -5.68145  | 3.10594  | -0.25657 |
| H | -6.63949  | -3.74221 | 6.23529  | C               | -2.83674  | 1.78084  | 1.10547  |
| H | -5.62707  | -4.28008 | 4.88040  | C               | -3.01118  | 0.99781  | 2.40892  |
| H | -5.07369  | -4.50230 | 6.55893  | C               | -4.50129  | 1.12265  | 2.69883  |
| H | 2.13090   | -1.85636 | 0.80903  | N               | -3.70366  | 4.09090  | -0.83125 |
| H | 1.20262   | -1.49454 | -2.62239 | C               | -4.27965  | 4.87385  | -1.92318 |
| N | -9.89022  | 0.52209  | -3.84880 | C               | -5.07065  | 4.05957  | -2.95547 |
| H | -9.32029  | 1.34111  | -4.00076 | O               | -5.96987  | 4.59575  | -3.59662 |
| C | -11.00111 | 0.24528  | -4.73818 | C               | -3.16231  | 5.64194  | -2.64017 |
| H | -11.72869 | 1.06397  | -4.72482 | N               | -4.67454  | 2.77230  | -3.17076 |
| H | -10.65916 | 0.09384  | -5.76851 | C               | -5.31152  | 1.93969  | -4.17578 |
| H | -11.48351 | -0.66751 | -4.38674 | C               | -6.41686  | 1.01210  | -3.62194 |
| H | 5.57960   | 1.59044  | -3.82099 | O               | -6.60426  | -0.10888 | -4.09436 |
| H | 5.64590   | 1.59965  | -1.42013 | C               | -4.28171  | 1.15049  | -5.00652 |
| H | 5.19875   | -0.12591 | -3.88131 | C               | -3.33676  | 0.31737  | -4.20244 |
| H | 7.91181   | 1.15397  | -3.43446 | N               | -3.58777  | -0.97090 | -3.77109 |
| H | 8.36322   | -0.86364 | -1.83158 | C               | -2.07695  | 0.60677  | -3.72767 |
| H | 8.07892   | -1.21279 | 2.33452  | C               | -2.50306  | -1.39972 | -3.07247 |
| H | 9.58622   | -2.06524 | 2.72748  | N               | -1.56144  | -0.46501 | -3.02552 |
| H | 0.00565   | 6.48243  | 6.87703  | N               | -7.20918  | 1.56532  | -2.66570 |
| H | 0.18018   | 4.70783  | 7.09460  | C               | -8.28491  | 0.80041  | -2.03312 |
| H | -6.77313  | 3.14530  | 4.99812  | C               | -9.55035  | 0.66345  | -2.90553 |
| H | -6.80077  | 1.52218  | 4.25476  | O               | -10.35526 | -0.23320 | -2.66881 |
|   |           |          |          | C               | -8.59240  | 1.41542  | -0.64054 |

|   |          |          |          |   |           |          |          |
|---|----------|----------|----------|---|-----------|----------|----------|
| C | -9.18246 | 2.83054  | -0.74406 | C | 6.35366   | -0.77686 | -1.33524 |
| C | -9.48977 | 0.49894  | 0.19930  | N | 7.39150   | -0.93708 | -2.17234 |
| C | 8.99677  | -2.14711 | 1.98406  | C | 7.35781   | -0.06420 | -3.33676 |
| C | 8.90190  | -2.68800 | 0.57265  | C | 5.89346   | 0.43576  | -3.35569 |
| O | 9.34606  | -2.08930 | -0.40999 | C | 5.42322   | 0.31211  | -1.88973 |
| N | 8.29889  | -3.90969 | 0.48810  | C | 3.93046   | 0.05346  | -1.55126 |
| C | 7.86146  | -4.47078 | -0.77540 | C | 3.02476   | -0.29675 | -2.73571 |
| C | 6.35125  | -4.28764 | -0.91063 | N | 2.62493   | 0.87830  | -3.49204 |
| O | 5.62012  | -4.38574 | 0.09297  | C | 1.80627   | -1.14227 | -2.37940 |
| C | 8.17522  | -5.97289 | -0.85924 | O | 1.89210   | -2.12489 | -1.65427 |
| N | 5.87656  | -4.12646 | -2.14658 | H | -5.57635  | -5.46320 | -5.55805 |
| C | 4.44674  | -4.08415 | -2.38115 | H | -2.78651  | -7.13773 | -2.15037 |
| C | 3.79907  | -5.38448 | -1.81890 | H | -3.06645  | -8.70728 | -0.19520 |
| O | 4.41990  | -6.42741 | -1.83922 | H | -4.48720  | -7.78821 | 0.33082  |
| C | 4.13409  | -3.99719 | -3.89421 | H | -2.87537  | -7.03868 | 0.35093  |
| C | 5.00293  | -3.01433 | -4.68339 | H | -4.13795  | -9.01258 | -2.40999 |
| O | 6.23768  | -3.04833 | -4.61196 | H | -5.40177  | -5.94615 | -1.15277 |
| N | 4.36160  | -2.16972 | -5.52161 | H | -4.92788  | -6.47741 | -3.66109 |
| C | 2.06542  | -6.13908 | -0.07337 | H | -2.81617  | -1.77086 | -0.38373 |
| C | 2.09007  | -5.38826 | 1.25666  | H | -3.35501  | -1.29573 | 1.21321  |
| O | 1.25878  | -5.64151 | 2.12841  | H | -5.08130  | -2.51302 | -0.97945 |
| N | 3.06936  | -4.45580 | 1.42993  | H | -5.92554  | -0.40525 | -1.49896 |
| C | 3.22055  | -3.73593 | 2.68431  | H | -5.28491  | 0.38598  | -0.06404 |
| C | 2.41546  | -2.42151 | 2.76620  | H | -4.19889  | -0.11955 | -1.36498 |
| O | 2.47533  | -1.75590 | 3.79154  | H | -7.05254  | -1.80051 | 0.38749  |
| C | 4.69842  | -3.44680 | 3.00729  | H | -6.11719  | -3.05681 | 1.21021  |
| O | 5.28195  | -2.47247 | 2.15687  | H | -5.97643  | -1.38166 | 1.72482  |
| C | 0.90006  | -0.66564 | 1.65572  | H | -2.12787  | -3.57013 | 0.87535  |
| C | 0.10549  | -0.49045 | 2.94218  | H | -4.68648  | -4.85628 | 0.58925  |
| O | -0.48769 | -1.44948 | 3.47737  | H | -2.20900  | -3.44177 | 6.60209  |
| C | -0.08761 | -0.47951 | 0.46771  | H | -1.34295  | -2.34554 | 5.50171  |
| S | 0.42856  | 0.86777  | -0.66987 | H | 0.33968   | -4.97203 | 3.75380  |
| N | 0.03050  | 0.75459  | 3.41995  | H | 0.05695   | -3.28352 | 3.97194  |
| C | -0.68906 | 1.12379  | 4.63012  | H | -3.80837  | -4.00749 | 4.85550  |
| C | 0.23684  | 1.12156  | 5.83665  | H | -2.10763  | -2.44400 | 3.04800  |
| O | 0.45712  | 2.14302  | 6.50320  | H | -5.16600  | 2.51942  | 5.18696  |
| N | 0.80856  | -0.06857 | 6.09236  | H | -1.81803  | 2.14145  | 0.94662  |
| C | 1.80558  | -0.21746 | 7.12411  | H | -3.12094  | 1.17642  | 0.24057  |
| C | 1.20285  | 5.51305  | 6.83230  | H | -2.48880  | 1.52329  | 3.20206  |
| C | 1.74086  | 5.42079  | 5.40402  | H | -2.64857  | -0.02805 | 2.40404  |
| O | 2.06537  | 6.41355  | 4.74929  | H | -5.10030  | 0.47254  | 2.05489  |
| N | 1.90149  | 4.14816  | 4.94797  | H | -4.73192  | 0.89196  | 3.73585  |
| C | 2.70675  | 3.81490  | 3.78887  | H | -3.26125  | 3.82375  | 1.68758  |
| C | 1.88304  | 3.71058  | 2.49559  | H | -3.59062  | 6.25570  | -3.43539 |
| O | 0.76511  | 3.18329  | 2.47907  | H | -2.63045  | 6.28618  | -1.93424 |
| C | 3.40114  | 2.46407  | 4.06596  | H | -2.44152  | 4.94471  | -3.08008 |
| C | 4.25451  | 1.94016  | 2.95237  | H | -5.01572  | 5.58195  | -1.52489 |
| N | 5.02904  | 2.74815  | 2.13538  | H | -2.81660  | 4.44100  | -0.45423 |
| C | 4.47125  | 0.61623  | 2.64798  | H | -3.69512  | 1.87332  | -5.58079 |
| C | 5.70799  | 1.90873  | 1.36448  | H | -4.83245  | 0.52375  | -5.71185 |
| N | 5.40457  | 0.61226  | 1.64109  | H | -1.51641  | 1.52292  | -3.86029 |
| N | 2.47265  | 4.18676  | 1.37162  | H | -2.45860  | -2.38478 | -2.62933 |
| C | 1.80468  | 4.10442  | 0.08396  | H | -5.83096  | 2.63813  | -4.84219 |
| C | 2.67915  | 3.75945  | -1.12436 | H | -3.98864  | 2.35784  | -2.55329 |
| O | 2.09766  | 3.46466  | -2.18074 | H | -7.62018  | 1.49903  | -0.13913 |
| C | 1.02905  | 5.42228  | -0.25942 | H | -9.62620  | 0.92663  | 1.19833  |
| C | 0.02491  | 5.79600  | 0.78691  | H | -10.46984 | 0.36757  | -0.26486 |
| N | -1.32800 | 5.50802  | 0.66656  | H | -9.04601  | -0.49530 | 0.31339  |
| C | 0.26732  | 6.39118  | 2.00342  | H | -9.30874  | 3.25628  | 0.25583  |
| C | -1.88698 | 5.92752  | 1.79113  | H | -10.16258 | 2.81436  | -1.23292 |
| N | -0.95685 | 6.46182  | 2.62761  | H | -8.53397  | 3.51236  | -1.30320 |
| N | 4.03070  | 3.90951  | -1.08975 | H | -7.95083  | -0.23340 | -1.90025 |
| C | 4.77825  | 3.97785  | -2.34809 | H | -6.83701  | 2.35647  | -2.15077 |
| C | 6.29261  | 3.90202  | -2.06062 | H | 9.61269   | -1.24859 | 1.98543  |
| O | 6.73011  | 3.84939  | -0.91465 | H | 7.81632   | -6.38772 | -1.80486 |
| C | 4.41374  | 5.27042  | -3.12243 | H | 7.67242   | -6.50779 | -0.04785 |
| C | 4.80343  | 6.54022  | -2.36499 | H | 8.38624   | -3.92861 | -1.56485 |
| S | 4.26218  | 8.01957  | -3.30320 | H | 7.76021   | -4.21126 | 1.29037  |
| C | 4.77761  | 9.30806  | -2.11483 | H | 3.06981   | -3.78055 | -4.01950 |
| N | 7.08839  | 3.91203  | -3.16806 | H | 4.32976   | -4.97824 | -4.34381 |
| C | 8.55141  | 3.98752  | -3.12654 | H | 4.95125   | -1.54149 | -6.05025 |
| C | 1.51341  | 1.99780  | -5.34810 | H | 3.38731   | -1.88629 | -5.43810 |
| C | 2.14411  | 0.75367  | -4.75778 | H | 4.01130   | -3.22271 | -1.86423 |
| O | 2.20359  | -0.30633 | -5.39304 | H | 6.48209   | -3.92544 | -2.94048 |
| O | 6.19492  | -1.38308 | -0.26858 | H | 2.76933   | -6.97850 | -0.02286 |

|   |           |          |          |                 |           |          |          |
|---|-----------|----------|----------|-----------------|-----------|----------|----------|
| H | 1.05950   | -6.55356 | -0.13430 | H               | 2.12566   | 0.77438  | 7.44420  |
| H | 5.25300   | -4.39454 | 2.97800  | H               | 8.90292   | 4.95533  | -3.49756 |
| H | 4.73910   | -3.04279 | 4.02141  | H               | 8.85995   | 3.86731  | -2.08787 |
| H | 5.48283   | -2.87767 | 1.29510  | H               | 9.25272   | -6.13393 | -0.77679 |
| H | 2.81462   | -4.36678 | 3.48521  | H               | -4.46573  | -1.48469 | -3.83346 |
| H | 3.81930   | -4.37914 | 0.74858  | H               | -0.43375  | 0.49909  | -1.65787 |
| H | -1.52048  | 0.43201  | 4.79515  | O               | -0.21778  | -3.67628 | -0.47527 |
| H | -1.05673  | 2.14314  | 4.51552  | H               | 0.33222   | -3.15432 | -1.08039 |
| H | 0.47840   | 1.53535  | 2.93537  | H               | -1.00331  | -3.95700 | -0.98552 |
| H | 1.40875   | -0.75322 | 7.99413  | C               | 1.56406   | -2.04496 | 1.58482  |
| H | 0.64195   | -0.83872 | 5.45626  | H               | 0.81054   | -2.83289 | 1.46094  |
| H | 2.05654   | 5.54984  | 7.51711  | H               | 2.17314   | -2.11484 | 0.67856  |
| H | 2.63970   | 1.71192  | 4.30370  | C               | 2.36937   | -5.29071 | -1.32424 |
| H | 3.99779   | 2.60328  | 4.97633  | H               | 2.08496   | -4.25671 | -1.16600 |
| H | 4.08388   | -0.29297 | 3.07229  | H               | 1.74855   | -5.65433 | -2.15437 |
| H | 5.73204   | -0.22036 | 1.14823  |                 |           |          |          |
| H | 6.42300   | 2.20543  | 0.61239  | <b>TS-1-N23</b> |           |          |          |
| H | 3.45979   | 4.59842  | 3.66806  | C               | -5.54401  | -4.46256 | -5.12022 |
| H | 1.48649   | 3.39072  | 5.48781  | C               | -5.09390  | -4.43403 | -3.66934 |
| H | 0.52685   | 5.26928  | -1.21720 | O               | -5.03456  | -3.37194 | -3.04571 |
| H | 1.76075   | 6.22959  | -0.38851 | N               | -4.76780  | -5.63407 | -3.12715 |
| H | 1.17122   | 6.70108  | 2.50545  | C               | -4.46647  | -5.88640 | -1.72664 |
| H | -1.11921  | 6.82270  | 3.55541  | C               | -3.54358  | -4.82053 | -1.11474 |
| H | -2.93735  | 5.86424  | 2.04808  | O               | -2.54337  | -4.43152 | -1.73255 |
| H | 1.06547   | 3.30702  | 0.16422  | C               | -3.75231  | -7.25222 | -1.63537 |
| H | 3.41612   | 4.53909  | 1.46017  | O               | -4.59393  | -8.16324 | -2.35423 |
| H | 3.33649   | 5.25141  | -3.30333 | C               | -3.53257  | -7.71658 | -0.19918 |
| H | 4.89420   | 5.25833  | -4.10765 | N               | -3.86912  | -4.46185 | 0.13501  |
| H | 5.88776   | 6.58700  | -2.21122 | C               | -3.21184  | -3.42858 | 0.92444  |
| H | 4.32433   | 6.54767  | -1.38053 | C               | -3.66348  | -3.63927 | 2.38180  |
| H | 4.51104   | 10.27338 | -2.55018 | O               | -4.64381  | -4.34219 | 2.65179  |
| H | 4.25383   | 9.19323  | -1.16186 | C               | -3.54117  | -2.00098 | 0.40145  |
| H | 5.85791   | 9.28090  | -1.94759 | C               | -4.95562  | -1.79365 | -0.16803 |
| H | 4.49259   | 3.12080  | -2.96893 | C               | -6.08472  | -2.02836 | 0.84627  |
| H | 4.56320   | 3.93741  | -0.22452 | C               | -5.09223  | -0.39987 | -0.79879 |
| H | 8.99103   | 3.18773  | -3.72900 | N               | -2.92832  | -2.98677 | 3.30770  |
| H | 6.64401   | 4.00613  | -4.06909 | C               | -3.21649  | -3.10178 | 4.73427  |
| H | 1.94620   | 2.18413  | -6.33402 | C               | -3.97049  | -1.84988 | 5.20963  |
| H | 1.68139   | 0.10278  | 1.63267  | O               | -3.47083  | -0.72546 | 5.11319  |
| H | -1.08540  | -0.23565 | 0.83035  | C               | -1.92767  | -3.26383 | 5.56032  |
| H | -0.17260  | -1.40443 | -0.09949 | C               | -1.17104  | -4.49925 | 5.05869  |
| H | 7.61164   | -0.62318 | -4.24124 | O               | -1.58362  | -5.62593 | 5.31065  |
| H | 3.50406   | 0.91888  | -1.03838 | N               | -0.06770  | -4.22876 | 4.31414  |
| H | 3.88881   | -0.76901 | -0.83091 | C               | -5.89459  | 2.95986  | 4.49728  |
| H | 3.57262   | -0.95230 | -3.41987 | C               | -5.19709  | 3.47603  | 3.24262  |
| H | 2.41743   | 1.73322  | -2.97484 | O               | -5.03548  | 4.68068  | 3.04068  |
| N | -5.19062  | -2.03761 | 5.76864  | N               | -4.74370  | 2.53276  | 2.36042  |
| H | -5.62895  | -1.18122 | 6.08089  | C               | -3.81632  | 2.96652  | 1.30909  |
| C | -5.98692  | -3.26535 | 5.76306  | C               | -4.51750  | 3.39417  | 0.01871  |
| H | -7.01818  | -3.00382 | 6.00701  | O               | -5.68145  | 3.10594  | -0.25657 |
| H | -5.97089  | -3.73762 | 4.77682  | C               | -2.83674  | 1.78084  | 1.10547  |
| H | -5.63181  | -3.98411 | 6.50962  | C               | -3.01118  | 0.99781  | 2.40892  |
| H | 0.87223   | -0.91314 | -2.91775 | C               | -4.50129  | 1.12265  | 2.69883  |
| N | -9.72830  | 1.59617  | -3.88046 | N               | -3.70366  | 4.09090  | -0.83125 |
| H | -8.99482  | 2.27896  | -4.00720 | C               | -4.27965  | 4.87385  | -1.92318 |
| C | -10.86887 | 1.58886  | -4.77377 | C               | -5.07065  | 4.05957  | -2.95547 |
| H | -11.53362 | 0.78646  | -4.45122 | O               | -5.96987  | 4.59575  | -3.59662 |
| H | -11.40818 | 2.54151  | -4.73099 | C               | -3.16231  | 5.64194  | -2.64017 |
| H | -10.56375 | 1.40355  | -5.81033 | N               | -4.67454  | 2.77230  | -3.17076 |
| H | 5.82298   | 1.45213  | -3.74520 | C               | -5.31152  | 1.93969  | -4.17578 |
| H | 5.72927   | 1.21820  | -1.35234 | C               | -6.41686  | 1.01210  | -3.62194 |
| H | 5.30463   | -0.21052 | -4.00701 | O               | -6.60426  | -0.10888 | -4.09436 |
| H | 8.06678   | 0.76702  | -3.21956 | C               | -4.28171  | 1.15049  | -5.00652 |
| H | 8.21822   | -1.43274 | -1.83369 | C               | -3.33676  | 0.31737  | -4.20244 |
| H | 7.98481   | -1.90117 | 2.32919  | N               | -3.58777  | -0.97090 | -3.77109 |
| H | 9.42061   | -2.88917 | 2.66730  | C               | -2.07695  | 0.60677  | -3.72767 |
| H | 0.63887   | 6.44068  | 6.94359  | C               | -2.50306  | -1.39972 | -3.07247 |
| H | 0.58440   | 4.65214  | 7.09820  | N               | -1.56144  | -0.46501 | -3.02552 |
| H | -6.37303  | 3.80881  | 4.98531  | N               | -7.20918  | 1.56532  | -2.66570 |
| H | -6.64389  | 2.19821  | 4.26450  | C               | -8.28491  | 0.80041  | -2.03312 |
| H | -6.53612  | -4.00726 | -5.17488 | C               | -9.55035  | 0.66345  | -2.90553 |
| H | -4.86514  | -3.83719 | -5.70679 | O               | -10.35526 | -0.23320 | -2.66881 |
| H | 0.44778   | 1.79484  | -5.49340 | C               | -8.59240  | 1.41542  | -0.64054 |
| H | 1.62759   | 2.87744  | -4.71088 | C               | -9.18246  | 2.83054  | -0.74406 |
| H | 2.66159   | -0.77272 | 6.72987  | C               | -9.48977  | 0.49894  | 0.19930  |

|   |          |          |          |   |           |          |          |
|---|----------|----------|----------|---|-----------|----------|----------|
| C | 8.99677  | -2.14711 | 1.98406  | C | 7.35781   | -0.06420 | -3.33676 |
| C | 8.90190  | -2.68800 | 0.57265  | C | 5.89346   | 0.43576  | -3.35569 |
| O | 9.34606  | -2.08930 | -0.40999 | C | 5.42322   | 0.31211  | -1.88973 |
| N | 8.29889  | -3.90969 | 0.48810  | C | 3.93046   | 0.05346  | -1.55126 |
| C | 7.86146  | -4.47078 | -0.77540 | C | 3.02476   | -0.29675 | -2.73571 |
| C | 6.35125  | -4.28764 | -0.91063 | N | 2.62493   | 0.87830  | -3.49204 |
| O | 5.62012  | -4.38574 | 0.09297  | C | 1.80627   | -1.14227 | -2.37940 |
| C | 8.17522  | -5.97289 | -0.85924 | O | 1.89210   | -2.12489 | -1.65427 |
| N | 5.87656  | -4.12646 | -2.14658 | H | -5.57635  | -5.46320 | -5.55805 |
| C | 4.44674  | -4.08415 | -2.38115 | H | -2.78651  | -7.13773 | -2.15037 |
| C | 3.79907  | -5.38448 | -1.81890 | H | -3.06645  | -8.70728 | -0.19520 |
| O | 4.41990  | -6.42741 | -1.83922 | H | -4.48720  | -7.78821 | 0.33082  |
| C | 4.13409  | -3.99719 | -3.89421 | H | -2.87537  | -7.03868 | 0.35093  |
| C | 5.00293  | -3.01433 | -4.68339 | H | -4.13795  | -9.01258 | -2.40999 |
| O | 6.23768  | -3.04833 | -4.61196 | H | -5.40177  | -5.94615 | -1.15277 |
| N | 4.36160  | -2.16972 | -5.52161 | H | -4.92788  | -6.47741 | -3.66109 |
| C | 2.06542  | -6.13908 | -0.07337 | H | -2.81617  | -1.77086 | -0.38373 |
| C | 2.09007  | -5.38826 | 1.25666  | H | -3.35501  | -1.29573 | 1.21321  |
| O | 1.25878  | -5.64151 | 2.12841  | H | -5.08130  | -2.51302 | -0.97945 |
| N | 3.06936  | -4.45580 | 1.42993  | H | -5.92554  | -0.40525 | -1.49896 |
| C | 3.22055  | -3.73593 | 2.68431  | H | -5.28491  | 0.38598  | -0.06404 |
| C | 2.41546  | -2.42151 | 2.76620  | H | -4.19889  | -0.11955 | -1.36498 |
| O | 2.47533  | -1.75590 | 3.79154  | H | -7.05254  | -1.80051 | 0.38749  |
| C | 4.69842  | -3.44680 | 3.00729  | H | -6.11719  | -3.05681 | 1.21021  |
| O | 5.28195  | -2.47247 | 2.15687  | H | -5.97643  | -1.38166 | 1.72482  |
| C | 0.90006  | -0.66564 | 1.65572  | H | -2.12787  | -3.57013 | 0.87535  |
| C | 0.10549  | -0.49045 | 2.94218  | H | -4.68648  | -4.85628 | 0.58925  |
| O | -0.48769 | -1.44948 | 3.47737  | H | -2.20900  | -3.44177 | 6.60209  |
| C | -0.08761 | -0.47951 | 0.46771  | H | -1.34295  | -2.34554 | 5.50171  |
| S | 0.42856  | 0.86777  | -0.66987 | H | 0.33968   | -4.97203 | 3.75380  |
| N | 0.03050  | 0.75459  | 3.41995  | H | 0.05695   | -3.28352 | 3.97194  |
| C | -0.68906 | 1.12379  | 4.63012  | H | -3.80837  | -4.00749 | 4.85550  |
| C | 0.23684  | 1.12156  | 5.83665  | H | -2.10763  | -2.44400 | 3.04800  |
| O | 0.45712  | 2.14302  | 6.50320  | H | -5.16600  | 2.51942  | 5.18696  |
| N | 0.80856  | -0.06857 | 6.09236  | H | -1.81803  | 2.14145  | 0.94662  |
| C | 1.80558  | -0.21746 | 7.12411  | H | -3.12094  | 1.17642  | 0.24057  |
| C | 1.20285  | 5.51305  | 6.83230  | H | -2.48880  | 1.52329  | 3.20206  |
| C | 1.74086  | 5.42079  | 5.40402  | H | -2.64857  | -0.02805 | 2.40404  |
| O | 2.06537  | 6.41355  | 4.74929  | H | -5.10030  | 0.47254  | 2.05489  |
| N | 1.90149  | 4.14816  | 4.94797  | H | -4.73192  | 0.89196  | 3.73585  |
| C | 2.70675  | 3.81490  | 3.78887  | H | -3.26125  | 3.82375  | 1.68758  |
| C | 1.88304  | 3.71058  | 2.49559  | H | -3.59062  | 6.25570  | -3.43539 |
| O | 0.76511  | 3.18329  | 2.47907  | H | -2.63045  | 6.28618  | -1.93424 |
| C | 3.40114  | 2.46407  | 4.06596  | H | -2.44152  | 4.94471  | -3.08008 |
| C | 4.25451  | 1.94016  | 2.95237  | H | -5.01572  | 5.58195  | -1.52489 |
| N | 5.02904  | 2.74815  | 2.13538  | H | -2.81660  | 4.44100  | -0.45423 |
| C | 4.47125  | 0.61623  | 2.64798  | H | -3.69512  | 1.87332  | -5.58079 |
| C | 5.70799  | 1.90873  | 1.36448  | H | -4.83245  | 0.52375  | -5.71185 |
| N | 5.40457  | 0.61226  | 1.64109  | H | -1.51641  | 1.52292  | -3.86029 |
| N | 2.47265  | 4.18676  | 1.37162  | H | -2.45860  | -2.38478 | -2.62933 |
| C | 1.80468  | 4.10442  | 0.08396  | H | -5.83096  | 2.63813  | -4.84219 |
| C | 2.67915  | 3.75945  | -1.12436 | H | -3.98864  | 2.35784  | -2.55329 |
| O | 2.09766  | 3.46466  | -2.18074 | H | -7.62018  | 1.49903  | -0.13913 |
| C | 1.02905  | 5.42228  | -0.25942 | H | -9.62620  | 0.92663  | 1.19833  |
| C | 0.02491  | 5.79600  | 0.78691  | H | -10.46984 | 0.36757  | -0.26486 |
| N | -1.32800 | 5.50802  | 0.66656  | H | -9.04601  | -0.49530 | 0.31339  |
| C | 0.26732  | 6.39118  | 2.00342  | H | -9.30874  | 3.25628  | 0.25583  |
| C | -1.88698 | 5.92752  | 1.79113  | H | -10.16258 | 2.81436  | -1.23292 |
| N | -0.95685 | 6.46182  | 2.62761  | H | -8.53397  | 3.51236  | -1.30320 |
| N | 4.03070  | 3.90951  | -1.08975 | H | -7.95083  | -0.23340 | -1.90025 |
| C | 4.77825  | 3.97785  | -2.34809 | H | -6.83701  | 2.35647  | -2.15077 |
| C | 6.29261  | 3.90202  | -2.06062 | H | 9.61269   | -1.24859 | 1.98543  |
| O | 6.73011  | 3.84939  | -0.91465 | H | 7.81632   | -6.38772 | -1.80486 |
| C | 4.41374  | 5.27042  | -3.12243 | H | 7.67242   | -6.50779 | -0.04785 |
| C | 4.80343  | 6.54022  | -2.36499 | H | 8.38624   | -3.92861 | -1.56485 |
| S | 4.26218  | 8.01957  | -3.30320 | H | 7.76021   | -4.21126 | 1.29037  |
| C | 4.77761  | 9.30806  | -2.11483 | H | 3.06981   | -3.78055 | -4.01950 |
| N | 7.08839  | 3.91203  | -3.16806 | H | 4.32976   | -4.97824 | -4.34381 |
| C | 8.55141  | 3.98752  | -3.12654 | H | 4.95125   | -1.54149 | -6.05025 |
| C | 1.51341  | 1.99780  | -5.34810 | H | 3.38731   | -1.88629 | -5.43810 |
| C | 2.14411  | 0.75367  | -4.75778 | H | 4.01130   | -3.22271 | -1.86423 |
| O | 2.20359  | -0.30633 | -5.39304 | H | 6.48209   | -3.92544 | -2.94048 |
| O | 6.19492  | -1.38308 | -0.26858 | H | 2.76933   | -6.97850 | -0.02286 |
| C | 6.35366  | -0.77686 | -1.33524 | H | 1.05950   | -6.55356 | -0.13430 |
| N | 7.39150  | -0.93708 | -2.17234 | H | 5.25300   | -4.39454 | 2.97800  |

|   |           |          |          |                |           |          |          |
|---|-----------|----------|----------|----------------|-----------|----------|----------|
| H | 4.73910   | -3.04279 | 4.02141  | H              | 8.85995   | 3.86731  | -2.08787 |
| H | 5.48283   | -2.87767 | 1.29510  | H              | 9.25272   | -6.13393 | -0.77679 |
| H | 2.81462   | -4.36678 | 3.48521  | H              | -4.46573  | -1.48469 | -3.83346 |
| H | 3.81930   | -4.37914 | 0.74858  | H              | -0.43375  | 0.49909  | -1.65787 |
| H | -1.52048  | 0.43201  | 4.79515  | O              | -0.21778  | -3.67628 | -0.47527 |
| H | -1.05673  | 2.14314  | 4.51552  | H              | 0.33222   | -3.15432 | -1.08039 |
| H | 0.47840   | 1.53535  | 2.93537  | H              | -1.00331  | -3.95700 | -0.98552 |
| H | 1.40875   | -0.75322 | 7.99413  | C              | 1.56406   | -2.04496 | 1.58482  |
| H | 0.64195   | -0.83872 | 5.45626  | H              | 0.81054   | -2.83289 | 1.46094  |
| H | 2.05654   | 5.54984  | 7.51711  | H              | 2.17314   | -2.11484 | 0.67856  |
| H | 2.63970   | 1.71192  | 4.30370  | C              | 2.36937   | -5.29071 | -1.32424 |
| H | 3.99779   | 2.60328  | 4.97633  | H              | 2.08496   | -4.25671 | -1.16600 |
| H | 4.08388   | -0.29297 | 3.07229  | H              | 1.74855   | -5.65433 | -2.15437 |
| H | 5.73204   | -0.22036 | 1.14823  |                |           |          |          |
| H | 6.42300   | 2.20543  | 0.61239  | <b>Int-N23</b> |           |          |          |
| H | 3.45979   | 4.59842  | 3.66806  | C              | -5.54401  | -4.46256 | -5.12022 |
| H | 1.48649   | 3.39072  | 5.48781  | C              | -5.09390  | -4.43403 | -3.66934 |
| H | 0.52685   | 5.26928  | -1.21720 | O              | -5.03456  | -3.37194 | -3.04571 |
| H | 1.76075   | 6.22959  | -0.38851 | N              | -4.76780  | -5.63407 | -3.12715 |
| H | 1.17122   | 6.70108  | 2.50545  | C              | -4.46647  | -5.88640 | -1.72664 |
| H | -1.11921  | 6.82270  | 3.55541  | C              | -3.54358  | -4.82053 | -1.11474 |
| H | -2.93735  | 5.86424  | 2.04808  | O              | -2.54337  | -4.43152 | -1.73255 |
| H | 1.06547   | 3.30702  | 0.16422  | C              | -3.75231  | -7.25222 | -1.63537 |
| H | 3.41612   | 4.53909  | 1.46017  | O              | -4.59393  | -8.16324 | -2.35423 |
| H | 3.33649   | 5.25141  | -3.30333 | C              | -3.53257  | -7.71658 | -0.19918 |
| H | 4.89420   | 5.25833  | -4.10765 | N              | -3.86912  | -4.46185 | 0.13501  |
| H | 5.88776   | 6.58700  | -2.21122 | C              | -3.21184  | -3.42858 | 0.92444  |
| H | 4.32433   | 6.54767  | -1.38053 | C              | -3.66348  | -3.63927 | 2.38180  |
| H | 4.51104   | 10.27338 | -2.55018 | O              | -4.64381  | -4.34219 | 2.65179  |
| H | 4.25383   | 9.19323  | -1.16186 | C              | -3.54117  | -2.00098 | 0.40145  |
| H | 5.85791   | 9.28090  | -1.94759 | C              | -4.95562  | -1.79365 | -0.16803 |
| H | 4.49259   | 3.12080  | -2.96893 | C              | -6.08472  | -2.02836 | 0.84627  |
| H | 4.56320   | 3.93741  | -0.22452 | C              | -5.09223  | -0.39987 | -0.79879 |
| H | 8.99103   | 3.18773  | -3.72900 | N              | -2.92832  | -2.98677 | 3.30770  |
| H | 6.64401   | 4.00613  | -4.06909 | C              | -3.21649  | -3.10178 | 4.73427  |
| H | 1.94620   | 2.18413  | -6.33402 | C              | -3.97049  | -1.84988 | 5.20963  |
| H | 1.68139   | 0.10278  | 1.63267  | O              | -3.47083  | -0.72546 | 5.11319  |
| H | -1.08540  | -0.23565 | 0.83035  | C              | -1.92767  | -3.26383 | 5.56032  |
| H | -0.17260  | -1.40443 | -0.09949 | C              | -1.17104  | -4.49925 | 5.05869  |
| H | 7.61164   | -0.62318 | -4.24124 | O              | -1.58362  | -5.62593 | 5.31065  |
| H | 3.50406   | 0.91888  | -1.03838 | N              | -0.06770  | -4.22876 | 4.31414  |
| H | 3.88881   | -0.76901 | -0.83091 | C              | -5.89459  | 2.95986  | 4.49728  |
| H | 3.57262   | -0.95230 | -3.41987 | C              | -5.19709  | 3.47603  | 3.24262  |
| H | 2.41743   | 1.73322  | -2.97484 | O              | -5.03548  | 4.68068  | 3.04068  |
| N | -5.19062  | -2.03761 | 5.76864  | N              | -4.74370  | 2.53276  | 2.36042  |
| H | -5.62895  | -1.18122 | 6.08089  | C              | -3.81632  | 2.96652  | 1.30909  |
| C | -5.98692  | -3.26535 | 5.76306  | C              | -4.51750  | 3.39417  | 0.01871  |
| H | -7.01818  | -3.00382 | 6.00701  | O              | -5.68145  | 3.10594  | -0.25657 |
| H | -5.97089  | -3.73762 | 4.77682  | C              | -2.83674  | 1.78084  | 1.10547  |
| H | -5.63181  | -3.98411 | 6.50962  | C              | -3.01118  | 0.99781  | 2.40892  |
| H | 0.87223   | -0.91314 | -2.91775 | C              | -4.50129  | 1.12265  | 2.69883  |
| N | -9.72830  | 1.59617  | -3.88046 | N              | -3.70366  | 4.09090  | -0.83125 |
| H | -8.99482  | 2.27896  | -4.00720 | C              | -4.27965  | 4.87385  | -1.92318 |
| C | -10.86887 | 1.58886  | -4.77377 | C              | -5.07065  | 4.05957  | -2.95547 |
| H | -11.53362 | 0.78646  | -4.45122 | O              | -5.96987  | 4.59575  | -3.59662 |
| H | -11.40818 | 2.54151  | -4.73099 | C              | -3.16231  | 5.64199  | -2.64017 |
| H | -10.56375 | 1.40355  | -5.81033 | N              | -4.67454  | 2.77230  | -3.17076 |
| H | 5.82298   | 1.45213  | -3.74520 | C              | -5.31152  | 1.93969  | -4.17578 |
| H | 5.72927   | 1.21820  | -1.35234 | C              | -6.41686  | 1.01210  | -3.62194 |
| H | 5.30463   | -0.21052 | -4.00701 | O              | -6.60426  | -0.10888 | -4.09436 |
| H | 8.06678   | 0.76702  | -3.21956 | C              | -4.28171  | 1.15049  | -5.00652 |
| H | 8.21822   | -1.43274 | -1.83369 | C              | -3.33676  | 0.31737  | -4.20244 |
| H | 7.98481   | -1.90117 | 2.32919  | N              | -3.58777  | -0.97090 | -3.77109 |
| H | 9.42061   | -2.88917 | 2.66730  | C              | -2.07695  | 0.60677  | -3.72767 |
| H | 0.63887   | 6.44068  | 6.94359  | C              | -2.50306  | -1.39972 | -3.07247 |
| H | 0.58440   | 4.65214  | 7.09820  | N              | -1.56144  | -0.46501 | -3.02552 |
| H | -6.37303  | 3.80881  | 4.98531  | N              | -7.20918  | 1.56532  | -2.66570 |
| H | -6.64389  | 2.19821  | 4.26450  | C              | -8.28491  | 0.80041  | -2.03312 |
| H | -6.53612  | -4.00726 | -5.17488 | C              | -9.55035  | 0.66345  | -2.90553 |
| H | -4.86514  | -3.83719 | -5.70679 | O              | -10.35526 | -0.23320 | -2.66881 |
| H | 0.44778   | 1.79484  | -5.49340 | C              | -8.59240  | 1.41542  | -0.64054 |
| H | 1.62759   | 2.87744  | -4.71088 | C              | -9.18246  | 2.83054  | -0.74406 |
| H | 2.66159   | -0.77272 | 6.72987  | C              | -9.48977  | 0.49894  | 0.19930  |
| H | 2.12566   | 0.77438  | 7.44420  | C              | 8.99677   | -2.14711 | 1.98406  |
| H | 8.90292   | 4.95533  | -3.49756 | C              | 8.90190   | -2.68800 | 0.57265  |

|   |          |          |          |   |           |          |          |
|---|----------|----------|----------|---|-----------|----------|----------|
| O | 9.34606  | -2.08930 | -0.40999 | C | 5.42322   | 0.31211  | -1.88973 |
| N | 8.29889  | -3.90969 | 0.48810  | C | 3.93046   | 0.05346  | -1.55126 |
| C | 7.86146  | -4.47078 | -0.77540 | C | 3.02476   | -0.29675 | -2.73571 |
| C | 6.35125  | -4.28764 | -0.91063 | N | 2.62493   | 0.87830  | -3.49204 |
| O | 5.62012  | -4.38574 | 0.09297  | C | 1.80627   | -1.14227 | -2.37940 |
| C | 8.17522  | -5.97289 | -0.85924 | O | 1.89210   | -2.12489 | -1.65427 |
| N | 5.87656  | -4.12646 | -2.14658 | H | -5.57635  | -5.46320 | -5.55805 |
| C | 4.44674  | -4.08415 | -2.38115 | H | -2.78651  | -7.13773 | -2.15037 |
| C | 3.79907  | -5.38448 | -1.81890 | H | -3.06645  | -8.70728 | -0.19520 |
| O | 4.41990  | -6.42741 | -1.83922 | H | -4.48720  | -7.78821 | 0.33082  |
| C | 4.13409  | -3.99719 | -3.89421 | H | -2.87537  | -7.03868 | 0.35093  |
| C | 5.00293  | -3.01433 | -4.68339 | H | -4.13795  | -9.01258 | -2.40999 |
| O | 6.23768  | -3.04833 | -4.61196 | H | -5.40177  | -5.94615 | -1.15277 |
| N | 4.36160  | -2.16972 | -5.52161 | H | -4.92788  | -6.47741 | -3.66109 |
| C | 2.06542  | -6.13908 | -0.07337 | H | -2.81617  | -1.77086 | -0.38373 |
| C | 2.09007  | -5.38826 | 1.25666  | H | -3.35501  | -1.29573 | 1.21321  |
| O | 1.25878  | -5.64151 | 2.12841  | H | -5.08130  | -2.51302 | -0.97945 |
| N | 3.06936  | -4.45580 | 1.42993  | H | -5.92554  | -0.40525 | -1.49896 |
| C | 3.22055  | -3.73593 | 2.68431  | H | -5.28491  | 0.38598  | -0.06404 |
| C | 2.41546  | -2.42151 | 2.76620  | H | -4.19889  | -0.11955 | -1.36498 |
| O | 2.47533  | -1.75590 | 3.79154  | H | -7.05254  | -1.80051 | 0.38749  |
| C | 4.69842  | -3.44680 | 3.00729  | H | -6.11719  | -3.05681 | 1.21021  |
| O | 5.28195  | -2.47247 | 2.15687  | H | -5.97643  | -1.38166 | 1.72482  |
| C | 0.90006  | -0.66564 | 1.65572  | H | -2.12787  | -3.57013 | 0.87535  |
| C | 0.10549  | -0.49045 | 2.94218  | H | -4.68648  | -4.85628 | 0.58925  |
| O | -0.48769 | -1.44948 | 3.47737  | H | -2.20900  | -3.44177 | 6.60209  |
| C | -0.08761 | -0.47951 | 0.46771  | H | -1.34295  | -2.34554 | 5.50171  |
| S | 0.42856  | 0.86777  | -0.66987 | H | 0.33968   | -4.97203 | 3.75380  |
| N | 0.03050  | 0.75459  | 3.41995  | H | 0.05695   | -3.28352 | 3.97194  |
| C | -0.68906 | 1.12379  | 4.63012  | H | -3.80837  | -4.00749 | 4.85550  |
| C | 0.23684  | 1.12156  | 5.83665  | H | -2.10763  | -2.44400 | 3.04800  |
| O | 0.45712  | 2.14302  | 6.50320  | H | -5.16600  | 2.51942  | 5.18696  |
| N | 0.80856  | -0.06857 | 6.09236  | H | -1.81803  | 2.14145  | 0.94662  |
| C | 1.80558  | -0.21746 | 7.12411  | H | -3.12094  | 1.17642  | 0.24057  |
| C | 1.20285  | 5.51305  | 6.83230  | H | -2.48880  | 1.52329  | 3.20206  |
| C | 1.74086  | 5.42079  | 5.40402  | H | -2.64857  | -0.02805 | 2.40404  |
| O | 2.06537  | 6.41355  | 4.74929  | H | -5.10030  | 0.47254  | 2.05489  |
| N | 1.90149  | 4.14816  | 4.94797  | H | -4.73192  | 0.89196  | 3.73585  |
| C | 2.70675  | 3.81490  | 3.78887  | H | -3.26125  | 3.82375  | 1.68758  |
| C | 1.88304  | 3.71058  | 2.49559  | H | -3.59062  | 6.25570  | -3.43539 |
| O | 0.76511  | 3.18329  | 2.47907  | H | -2.63045  | 6.28618  | -1.93424 |
| C | 3.40114  | 2.46407  | 4.06596  | H | -2.44152  | 4.94471  | -3.08008 |
| C | 4.25451  | 1.94016  | 2.95237  | H | -5.01572  | 5.58195  | -1.52489 |
| N | 5.02904  | 2.74815  | 2.13538  | H | -2.81660  | 4.44100  | -0.45423 |
| C | 4.47125  | 0.61623  | 2.64798  | H | -3.69512  | 1.87332  | -5.58079 |
| C | 5.70799  | 1.90873  | 1.36448  | H | -4.83245  | 0.52375  | -5.71185 |
| N | 5.40457  | 0.61226  | 1.64109  | H | -1.51641  | 1.52292  | -3.86029 |
| N | 2.47265  | 4.18676  | 1.37162  | H | -2.45860  | -2.38478 | -2.62933 |
| C | 1.80468  | 4.10442  | 0.08396  | H | -5.83096  | 2.63813  | -4.84219 |
| C | 2.67915  | 3.75945  | -1.12436 | H | -3.98864  | 2.35784  | -2.55329 |
| O | 2.09766  | 3.46466  | -2.18074 | H | -7.62018  | 1.49903  | -0.13913 |
| C | 1.02905  | 5.42228  | -0.25942 | H | -9.62620  | 0.92663  | 1.19833  |
| C | 0.02491  | 5.79600  | 0.78691  | H | -10.46984 | 0.36757  | -0.26486 |
| N | -1.32800 | 5.50802  | 0.66656  | H | -9.04601  | -0.49530 | 0.31339  |
| C | 0.26732  | 6.39118  | 2.00342  | H | -9.30874  | 3.25628  | 0.25583  |
| C | -1.88698 | 5.92752  | 1.79113  | H | -10.16258 | 2.81436  | -1.23292 |
| N | -0.95685 | 6.46182  | 2.62761  | H | -8.53397  | 3.51236  | -1.30320 |
| N | 4.03070  | 3.90951  | -1.08975 | H | -7.95083  | -0.23340 | -1.90025 |
| C | 4.77825  | 3.97785  | -2.34809 | H | -6.83701  | 2.35647  | -2.15077 |
| C | 6.29261  | 3.90202  | -2.06062 | H | 9.61269   | -1.24859 | 1.98543  |
| O | 6.73011  | 3.84939  | -0.91465 | H | 7.81632   | -6.38772 | -1.80486 |
| C | 4.41374  | 5.27042  | -3.12243 | H | 7.67242   | -6.50779 | -0.04785 |
| C | 4.80343  | 6.54022  | -2.36499 | H | 8.38624   | -3.92861 | -1.56485 |
| S | 4.26218  | 8.01957  | -3.30320 | H | 7.76021   | -4.21126 | 1.29037  |
| C | 4.77761  | 9.30806  | -2.11483 | H | 3.06981   | -3.78055 | -4.01950 |
| N | 7.08839  | 3.91203  | -3.16806 | H | 4.32976   | -4.97824 | -4.34381 |
| C | 8.55141  | 3.98752  | -3.12654 | H | 4.95125   | -1.54149 | -6.05025 |
| C | 1.51341  | 1.99780  | -5.34810 | H | 3.38731   | -1.88629 | -5.43810 |
| C | 2.14411  | 0.75367  | -4.75778 | H | 4.01130   | -3.22271 | -1.86423 |
| O | 2.20359  | -0.30633 | -5.39304 | H | 6.48209   | -3.92544 | -2.94048 |
| O | 6.19492  | -1.38308 | -0.26858 | H | 2.76933   | -6.97850 | -0.02286 |
| C | 6.35366  | -0.77686 | -1.33524 | H | 1.05950   | -6.55356 | -0.13430 |
| N | 7.39150  | -0.93708 | -2.17234 | H | 5.25300   | -4.39454 | 2.97800  |
| C | 7.35781  | -0.06420 | -3.33676 | H | 4.73910   | -3.04279 | 4.02141  |
| C | 5.89346  | 0.43576  | -3.35569 | H | 5.48283   | -2.87767 | 1.29510  |

|   |           |          |          |   |          |          |          |
|---|-----------|----------|----------|---|----------|----------|----------|
| H | 2.81462   | -4.36678 | 3.48521  | H | -4.46573 | -1.48469 | -3.83346 |
| H | 3.81930   | -4.37914 | 0.74858  | H | -0.43375 | 0.49909  | -1.65787 |
| H | -1.52048  | 0.43201  | 4.79515  | O | -0.21778 | -3.67628 | -0.47527 |
| H | -1.05673  | 2.14314  | 4.51552  | H | 0.33222  | -3.15432 | -1.08039 |
| H | 0.47840   | 1.53535  | 2.93537  | H | -1.00331 | -3.95700 | -0.98552 |
| H | 1.40875   | -0.75322 | 7.99413  | C | 1.56406  | -2.04496 | 1.58482  |
| H | 0.64195   | -0.83872 | 5.45626  | H | 0.81054  | -2.83289 | 1.46094  |
| H | 2.05654   | 5.54984  | 7.51711  | H | 2.17314  | -2.11484 | 0.67856  |
| H | 2.63970   | 1.71192  | 4.30370  | C | 2.36937  | -5.29071 | -1.32424 |
| H | 3.99779   | 2.60328  | 4.97633  | H | 2.08496  | -4.25671 | -1.16600 |
| H | 4.08388   | -0.29297 | 3.07229  | H | 1.74855  | -5.65433 | -2.15437 |
| H | 5.73204   | -0.22036 | 1.14823  |   |          |          |          |
| H | 6.42300   | 2.20543  | 0.61239  |   |          |          |          |
| H | 3.45979   | 4.59842  | 3.66806  |   |          |          |          |
| H | 1.48649   | 3.39072  | 5.48781  |   |          |          |          |
| H | 0.52685   | 5.26928  | -1.21720 |   |          |          |          |
| H | 1.76075   | 6.22959  | -0.38851 |   |          |          |          |
| H | 1.17122   | 6.70108  | 2.50545  |   |          |          |          |
| H | -1.11921  | 6.82270  | 3.55541  |   |          |          |          |
| H | -2.93735  | 5.86424  | 2.04808  |   |          |          |          |
| H | 1.06547   | 3.30702  | 0.16422  |   |          |          |          |
| H | 3.41612   | 4.53909  | 1.46017  |   |          |          |          |
| H | 3.33649   | 5.25141  | -3.30333 |   |          |          |          |
| H | 4.89420   | 5.25833  | -4.10765 |   |          |          |          |
| H | 5.88776   | 6.58700  | -2.21122 |   |          |          |          |
| H | 4.32433   | 6.54767  | -1.38053 |   |          |          |          |
| H | 4.51104   | 10.27338 | -2.55018 |   |          |          |          |
| H | 4.25383   | 9.19323  | -1.16186 |   |          |          |          |
| H | 5.85791   | 9.28090  | -1.94759 |   |          |          |          |
| H | 4.49259   | 3.12080  | -2.96893 |   |          |          |          |
| H | 4.56320   | 3.93741  | -0.22452 |   |          |          |          |
| H | 8.99103   | 3.18773  | -3.72900 |   |          |          |          |
| H | 6.64401   | 4.00613  | -4.06909 |   |          |          |          |
| H | 1.94620   | 2.18413  | -6.33402 |   |          |          |          |
| H | 1.68139   | 0.10278  | 1.63267  |   |          |          |          |
| H | -1.08540  | -0.23565 | 0.83035  |   |          |          |          |
| H | -0.17260  | -1.40443 | -0.09949 |   |          |          |          |
| H | 7.61164   | -0.62318 | -4.24124 |   |          |          |          |
| H | 3.50406   | 0.91888  | -1.03838 |   |          |          |          |
| H | 3.88881   | -0.76901 | -0.83091 |   |          |          |          |
| H | 3.57262   | -0.95230 | -3.41987 |   |          |          |          |
| H | 2.41743   | 1.73322  | -2.97484 |   |          |          |          |
| N | -5.19062  | -2.03761 | 5.76864  |   |          |          |          |
| H | -5.62895  | -1.18122 | 6.08089  |   |          |          |          |
| C | -5.98692  | -3.26535 | 5.76306  |   |          |          |          |
| H | -7.01818  | -3.00382 | 6.00701  |   |          |          |          |
| H | -5.97089  | -3.73762 | 4.77682  |   |          |          |          |
| H | -5.63181  | -3.98411 | 6.50962  |   |          |          |          |
| H | 0.87223   | -0.91314 | -2.91775 |   |          |          |          |
| N | -9.72830  | 1.59617  | -3.88046 |   |          |          |          |
| H | -8.99482  | 2.27896  | -4.00720 |   |          |          |          |
| C | -10.86887 | 1.58886  | -4.77377 |   |          |          |          |
| H | -11.53362 | 0.78646  | -4.45122 |   |          |          |          |
| H | -11.40818 | 2.54151  | -4.73099 |   |          |          |          |
| H | -10.56375 | 1.40355  | -5.81033 |   |          |          |          |
| H | 5.82298   | 1.45213  | -3.74520 |   |          |          |          |
| H | 5.72927   | 1.21820  | -1.35234 |   |          |          |          |
| H | 5.30463   | -0.21052 | -4.00701 |   |          |          |          |
| H | 8.06678   | 0.76702  | -3.21956 |   |          |          |          |
| H | 8.21822   | -1.43274 | -1.83369 |   |          |          |          |
| H | 7.98481   | -1.90117 | 2.32919  |   |          |          |          |
| H | 9.42061   | -2.88917 | 2.66730  |   |          |          |          |
| H | 0.63887   | 6.44068  | 6.94359  |   |          |          |          |
| H | 0.58440   | 4.65214  | 7.09820  |   |          |          |          |
| H | -6.37303  | 3.80881  | 4.98531  |   |          |          |          |
| H | -6.64389  | 2.19821  | 4.26450  |   |          |          |          |
| H | -6.53612  | -4.00726 | -5.17488 |   |          |          |          |
| H | -4.86514  | -3.83719 | -5.70679 |   |          |          |          |
| H | 0.44778   | 1.79484  | -5.49340 |   |          |          |          |
| H | 1.62759   | 2.87744  | -4.71088 |   |          |          |          |
| H | 2.66159   | -0.77272 | 6.72987  |   |          |          |          |
| H | 2.12566   | 0.77438  | 7.44420  |   |          |          |          |
| H | 8.90292   | 4.95533  | -3.49756 |   |          |          |          |
| H | 8.85995   | 3.86731  | -2.08787 |   |          |          |          |
| H | 9.25272   | -6.13393 | -0.77679 |   |          |          |          |
